# Supplementary material for: Cobalt complexes with α-amino acid ligands catalyze the incorporation of CO2into cyclic carbonates
Source: Royal Society of Chemistry journal article supplement (doi:10.1039/d2dt03595b), 2023-01-01
Supplement: d2dt03595b1.pdf [file d2dt03595b1.pdf]

# Supplementary Information for Cobalt complexes with $\alpha$ -amino acid ligands catalyzes incorporation of CO<sub>2</sub> into cyclic carbonates.

Andrés Castro Ruiz<sup>1</sup>, Lea Grefe<sup>2</sup>, Esteban Mejía<sup>2</sup>, Sigridur G. Suman<sup>1</sup>

<sup>1</sup>Science Institute, University of Iceland, Dunhagi 3, 107 Reykjavik, Iceland

<sup>2</sup>Leibniz Institute for Catalysis, Albert-Einstein-Str. 29a, 18059 Rostock, Germany

## Contents

Figure S1A Structural connectivity of **1**, **7** and **9**

Table S1. Summary of crystal data and structural refinement parameters for **6**.

Table S2. Summary of unit cell parameters for **1**, **7**, and **9**.

Figures S1 Binary and Bifunctional salen catalysts system.

Figures S2 – S41: NMR spectroscopy of compounds 1-9

Figures S42 – S43: UV characterization of compounds 1-9

Figure S44 – S53: Infrared spectra of compounds 1-9

Figure S54 – S63: HRMS of compounds 1-9

Tables S3 –S4: Catalytic Studies

Table S5. NMR of cyclic carbonates.

Figures S64-S69: NMR chemical shifts of cyclic carbonates.

Figures S70. Tables S5-S6: Kinetic Studies

Table S6. Data obtained for Eyring analysis, linear fits, and calculated apparent reaction rate  $k_p$  for CO<sub>2</sub>/PO coupling at various temperatures.

Table S6. Data obtained for Arrhenius analysis, linear fits, and calculated rate coefficients for CO<sub>2</sub>/PO coupling at various temperatures.

Figures S71 – S72: Three- and two-dimensional stack plots of the IR *in situ* experiment for PC formation

Figures S73-S75 Experiments for carbamate salt formation

Figures S76-S78 Experiments supporting the mechanistic proposal

Table S1. Summary of crystal data and structural refinement parameters for **6**.

| Parameter                                             | <b>6</b>                                                           |
|-------------------------------------------------------|--------------------------------------------------------------------|
| Empirical formula                                     | C <sub>20</sub> H <sub>24</sub> N <sub>4</sub> O <sub>4</sub> CoCl |
| Colour                                                | Red block                                                          |
| Formula weight (g mol <sup>-1</sup> )                 | 478.81                                                             |
| Crystal size (mm)                                     | 0.45 × 0.35 × 0.30                                                 |
| Crystal system                                        | Orthorhombic                                                       |
| Space group                                           | P 2 <sub>1</sub> 2 <sub>1</sub> 2 <sub>1</sub>                     |
| a (Å)                                                 | 8.3459(6)                                                          |
| b (Å)                                                 | 12.9372(9)                                                         |
| c (Å)                                                 | 19.0279(14)                                                        |
| α (°)                                                 |                                                                    |
| β (°)                                                 |                                                                    |
| γ (°)                                                 |                                                                    |
| Volume (Å <sup>3</sup> )                              | 2054.5(3)                                                          |
| Z                                                     | 4                                                                  |
| ρ <sub>calc.</sub> (g/cm <sup>3</sup> )               | 1.548                                                              |
| F(000)                                                | 992.0                                                              |
| μ K <sub>α</sub> (mm <sup>-1</sup> )                  | 1.001                                                              |
| Temperature (K)                                       | 296(2) K                                                           |
| Reflections collected/unique/ observed<br>[I > 2σ(I)] | 74894/8384/                                                        |
| Data/restraints/parameters                            | 8384/0/279                                                         |
| Goodness of fit on F <sup>2</sup>                     | 1.042                                                              |
| Final R indices [I > 2σ(I)]                           | R <sub>1</sub> = 0.0279, wR <sub>2</sub> =<br>0.0770               |
| R indices (all data)                                  | R <sub>1</sub> = 0.0302, wR <sub>2</sub> =<br>0.0796               |

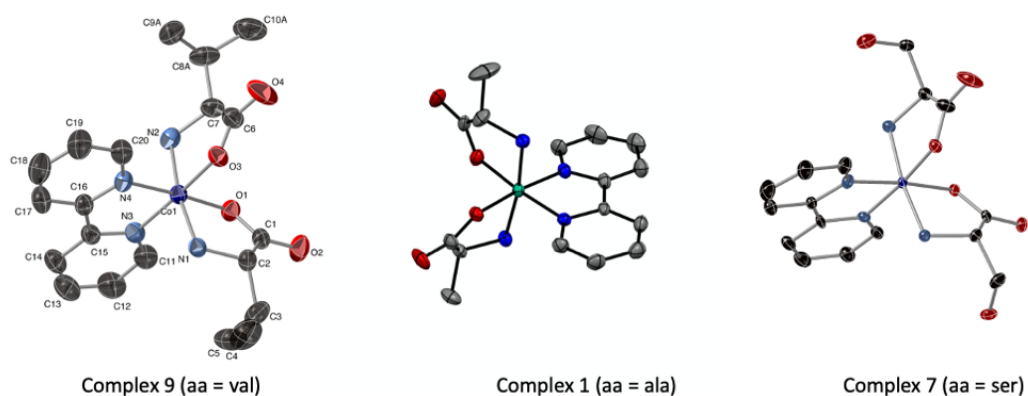

Figure S1A Structural connectivity of **1**, **7** and **9**. Figures obtained after partial refinement described in the main text.

SI Table 2. Unit cell parameters for **1**, **7** and **9**.

| Parameter/compound                      | <b>1</b>                                                           | <b>7</b>                                                           | <b>9</b>                                                           |
|-----------------------------------------|--------------------------------------------------------------------|--------------------------------------------------------------------|--------------------------------------------------------------------|
| Empirical formula                       | C <sub>16</sub> H <sub>24</sub> N <sub>4</sub> O <sub>6</sub> CoCl | C <sub>17</sub> H <sub>21</sub> N <sub>4</sub> O <sub>7</sub> CoCl | C <sub>16</sub> H <sub>24</sub> N <sub>4</sub> O <sub>6</sub> CoCl |
| Colour                                  | pink block                                                         | pink block                                                         | pink needle                                                        |
| Formula weight (g mol <sup>-1</sup> )   | 462.77                                                             | 463.74                                                             | 489.77                                                             |
| Crystal size (mm)                       | 0.40 × 0.30 × 0.20                                                 | 0.45 × 0.35 × 0.30                                                 | 0.52 × 0.14 × 0.12                                                 |
| Crystal system                          | Monoclinic                                                         | Monoclinic                                                         | Hexagonal                                                          |
| Space group                             | P 2 <sub>1</sub>                                                   | P 2 <sub>1</sub>                                                   | P 6 <sub>5</sub>                                                   |
| a (Å)                                   | 11.788(2)                                                          | 11.7639(15)                                                        | 16.5159(11)                                                        |
| b (Å)                                   | 10.3789(18)                                                        | 12.3920(15)                                                        | 16.5159(11)                                                        |
| c (Å)                                   | 19.083(3)                                                          | 15.4726(19)                                                        | 16.5811(11)                                                        |
| α (°)                                   | 90                                                                 | 90                                                                 | 90                                                                 |
| β (°)                                   | 107.52(6)                                                          | 111.65(4)                                                          | 90                                                                 |
| γ (°)                                   | 90                                                                 | 90                                                                 | 120                                                                |
| Volume (Å <sup>3</sup> )                | 2226.4(7)                                                          | 2096.4(5)                                                          | 3917.0(5)                                                          |
| Z                                       | 4                                                                  | 4                                                                  | 6                                                                  |
| ρ <sub>calc.</sub> (g/cm <sup>3</sup> ) | 1.396                                                              | 1.497                                                              | 1.291                                                              |
| Temperature (K)                         | 296(2) K                                                           | 150(2) K                                                           | 296(2) K                                                           |

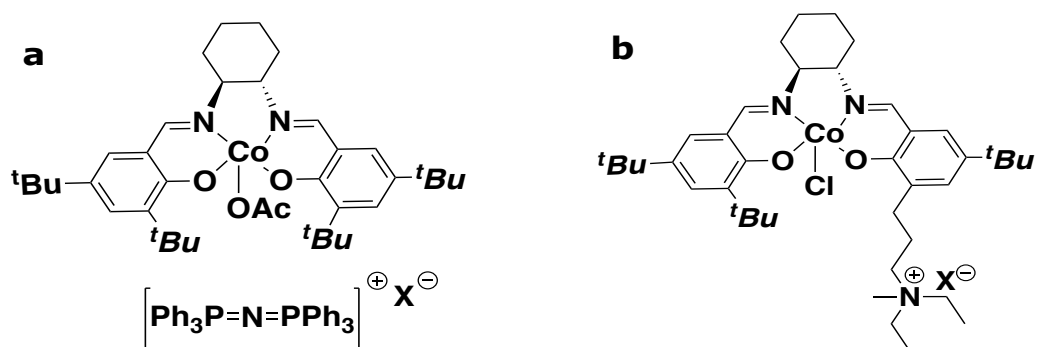

Figure S1. a) binary Co(III) salen/PPNCl catalyst. b) bifunctional Co(III) salen

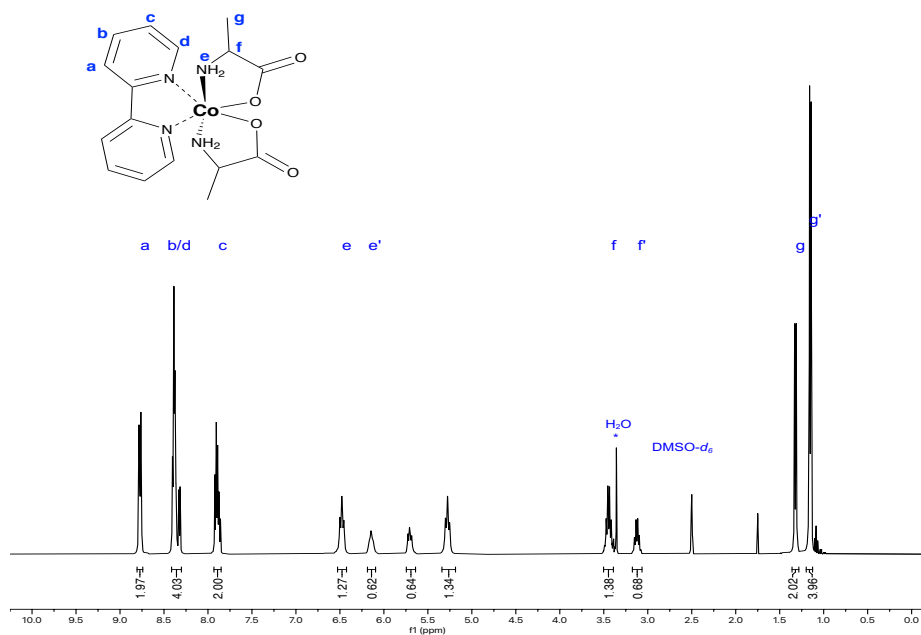

Figure S2.  $^1\text{H}$  NMR of **1** in  $\text{DMSO-}d_6$  mixture of diastereomers major product  $\Delta\text{-}RR/\Lambda\text{-}SS$  and minor product  $\Delta\text{-}SS/\Lambda\text{-}RR$  2:1

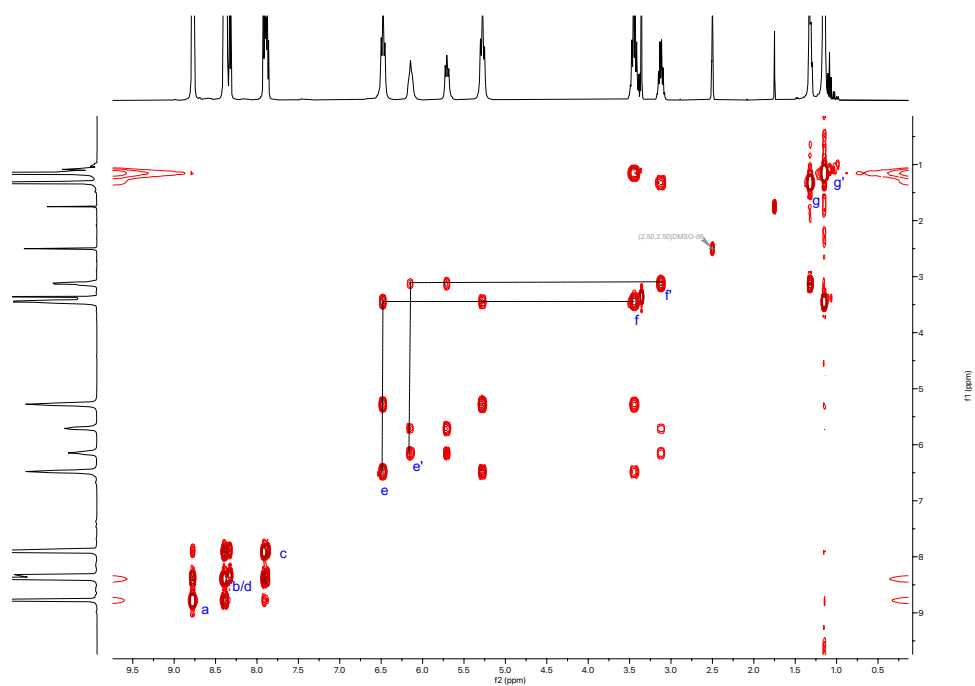

Figure S3. 2D COSY NMR of **1** ( $\text{DMSO-}d_6$ , 298 K)

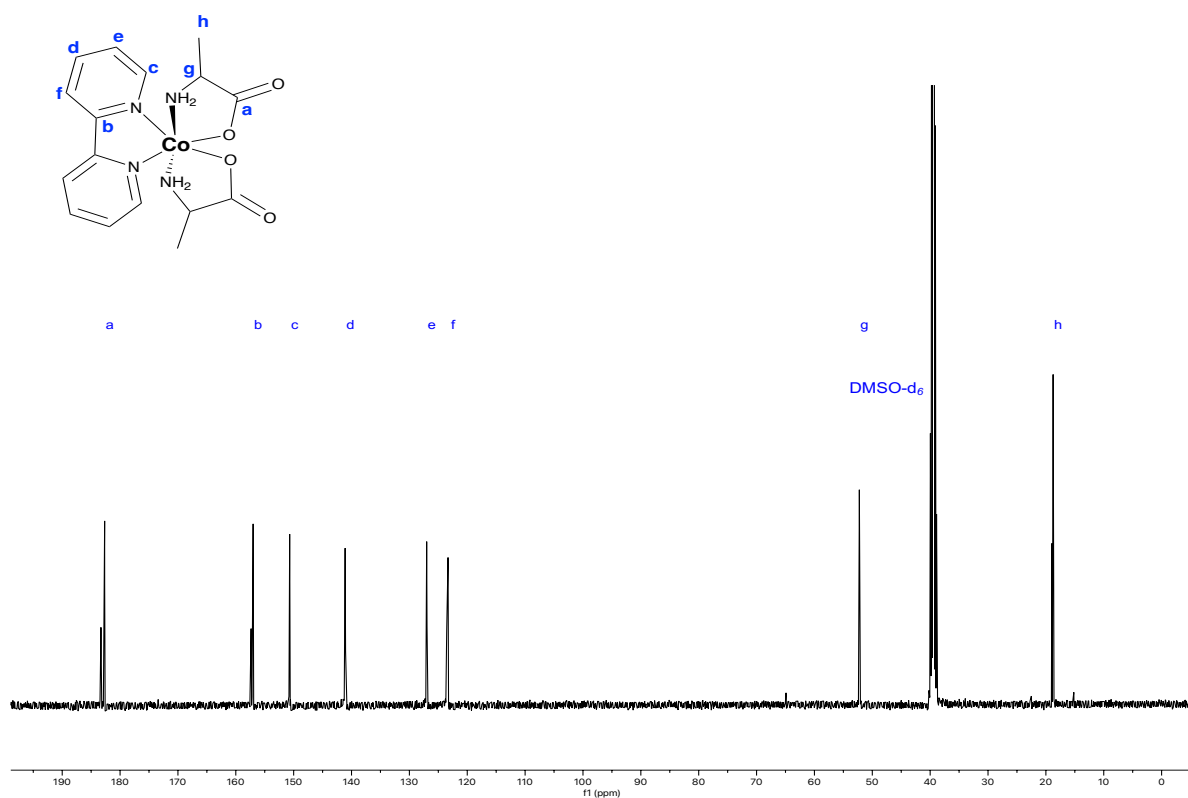

Figure S4.  $^{13}\text{C}\{^1\text{H}\}$  NMR of **1** (DMSO- $d_6$ , 298 K)

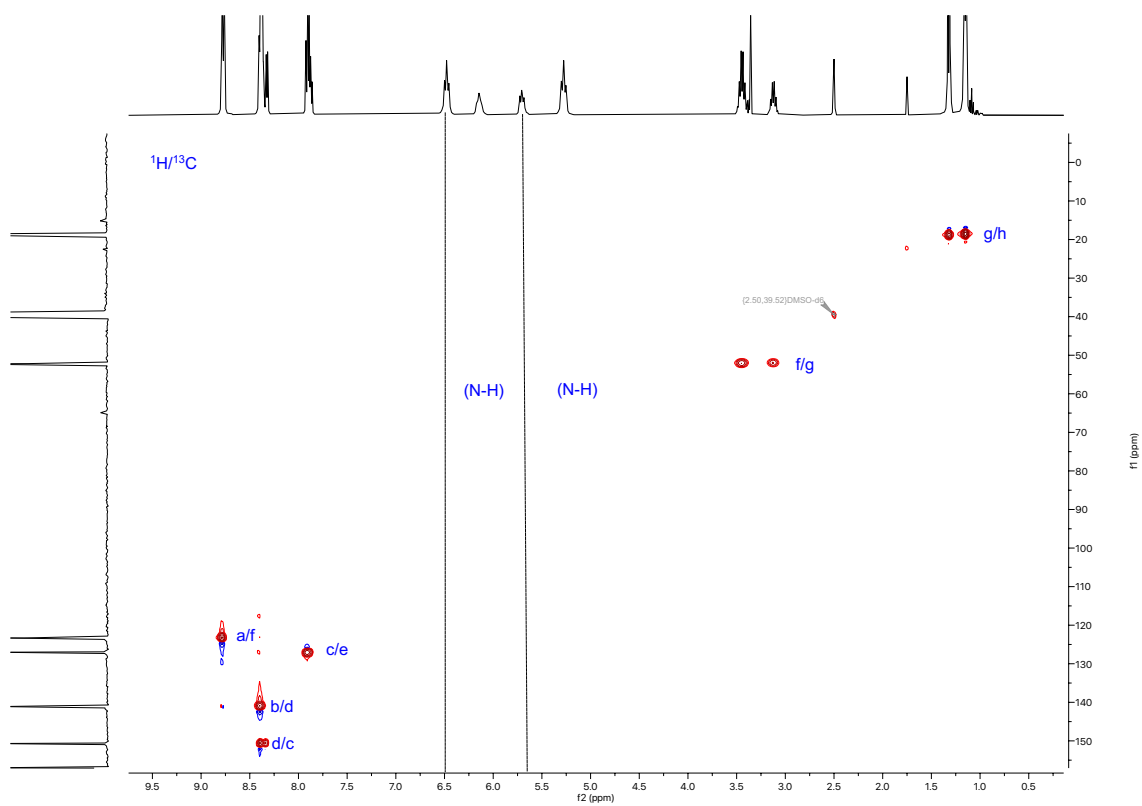

Figure S5. 2D HSQC NMR of **1** (DMSO- $d_6$ , 298 K)

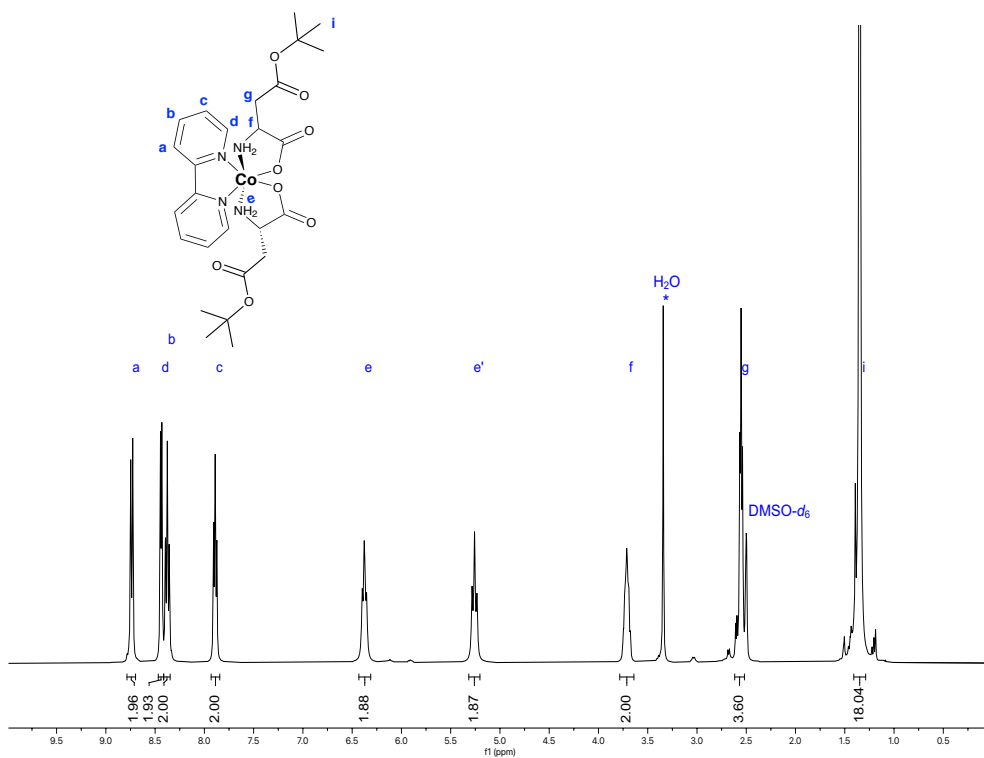

Figure S6.  $^1\text{H}$  NMR of **2** in ( $\text{DMSO-}d_6$ , 298 K)

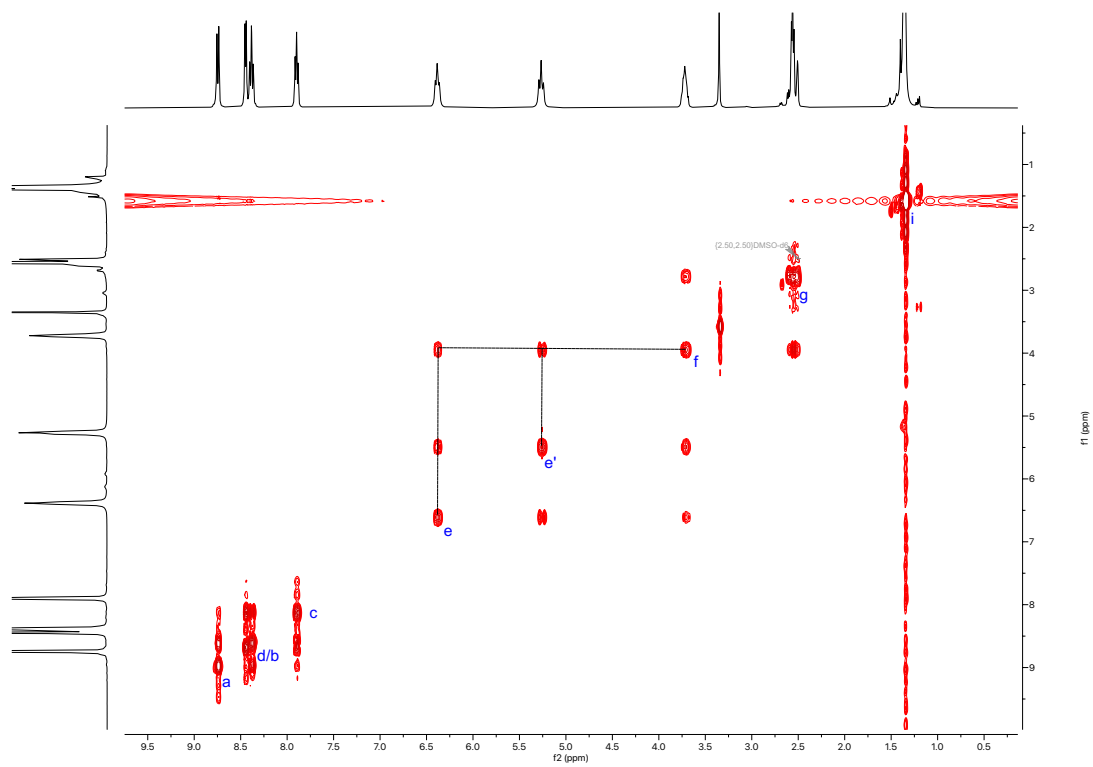

Figure S7. 2D COSY NMR of **2** ( $\text{DMSO-}d_6$ , 298 K)



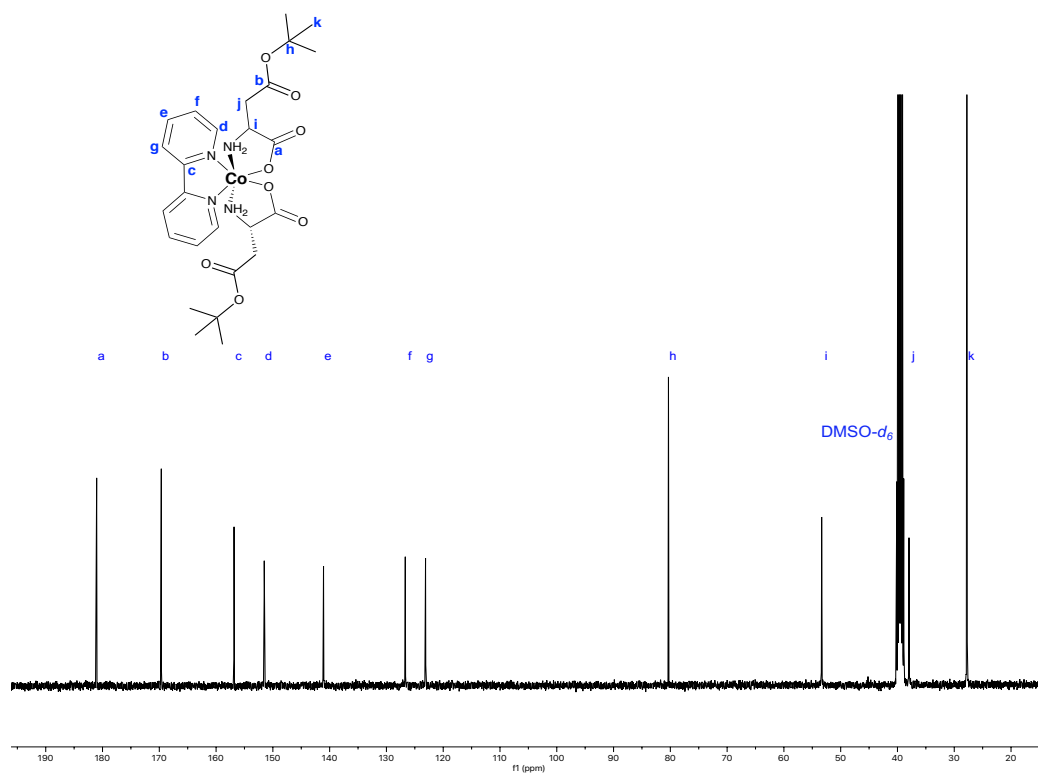

Figure S8.  $^{13}\text{C}\{^1\text{H}\}$  NMR of **2** (DMSO- $d_6$ , 298 K)

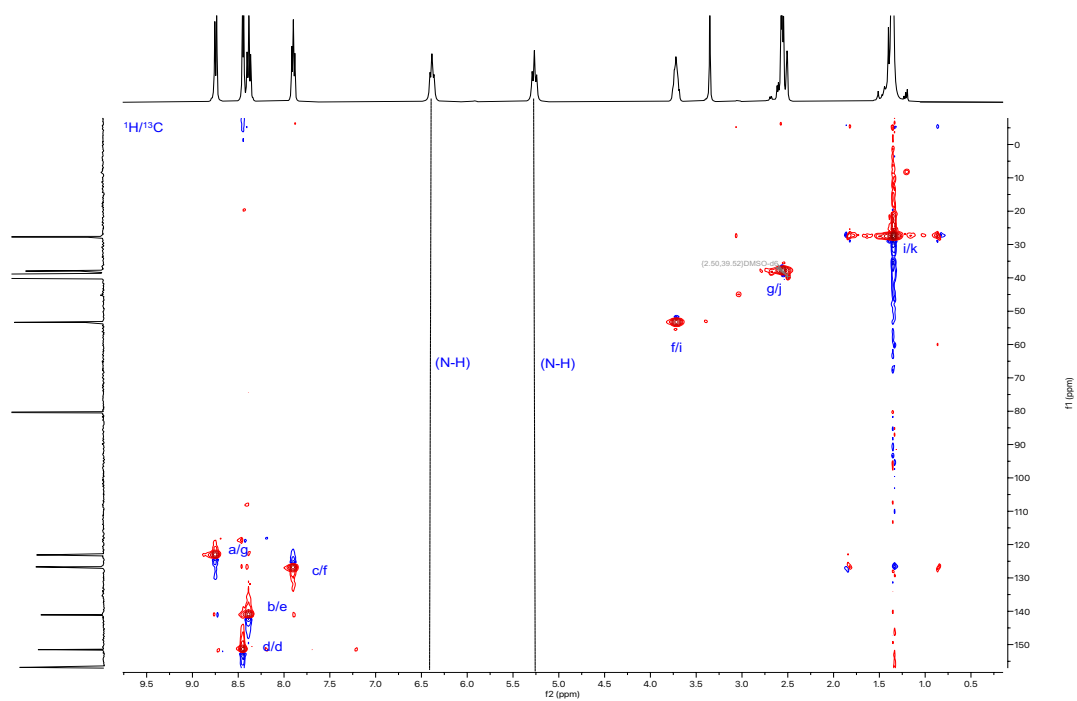

Figure S9. 2D HSQC NMR of **2** (DMSO- $d_6$ , 298 K)

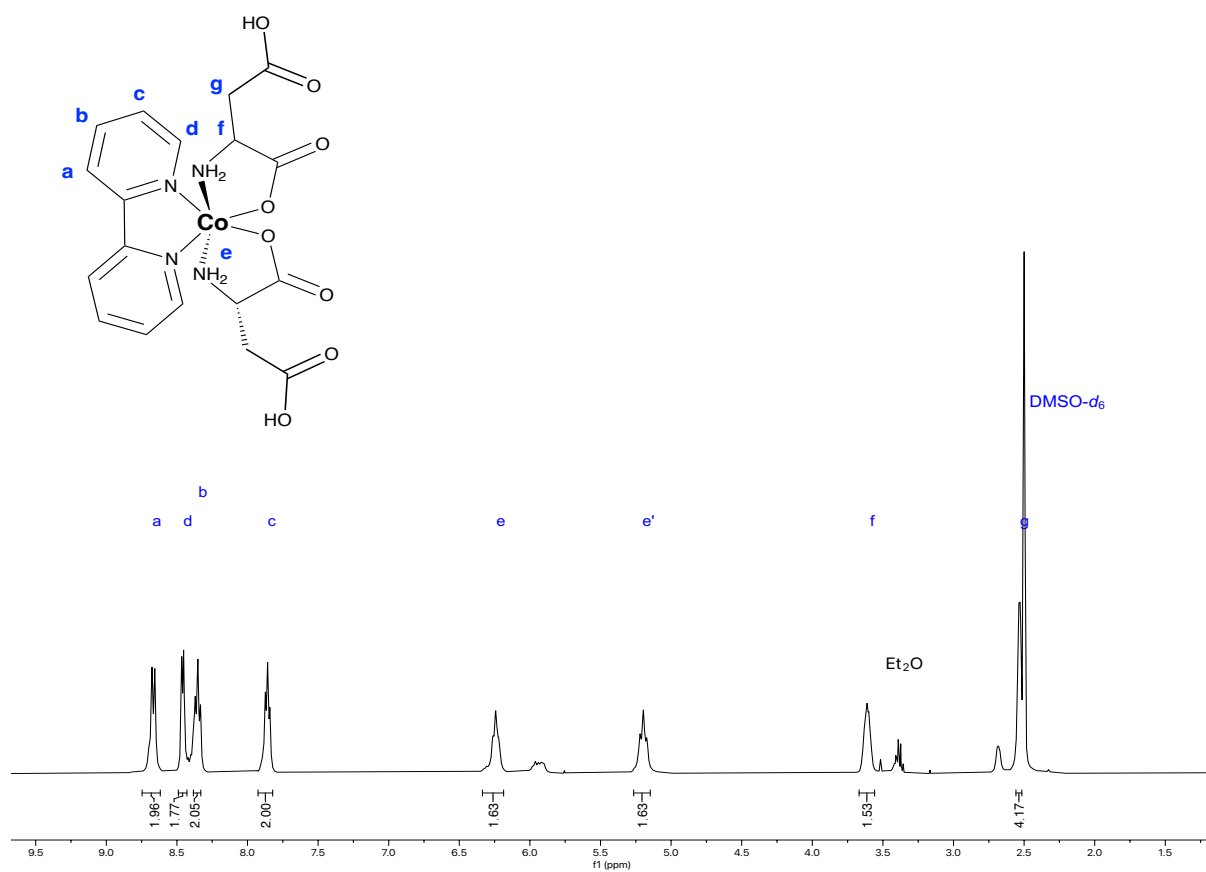

Figure S10.  $^1\text{H}$  NMR of **2a** in ( $\text{DMSO-}d_6$ , 298 K)

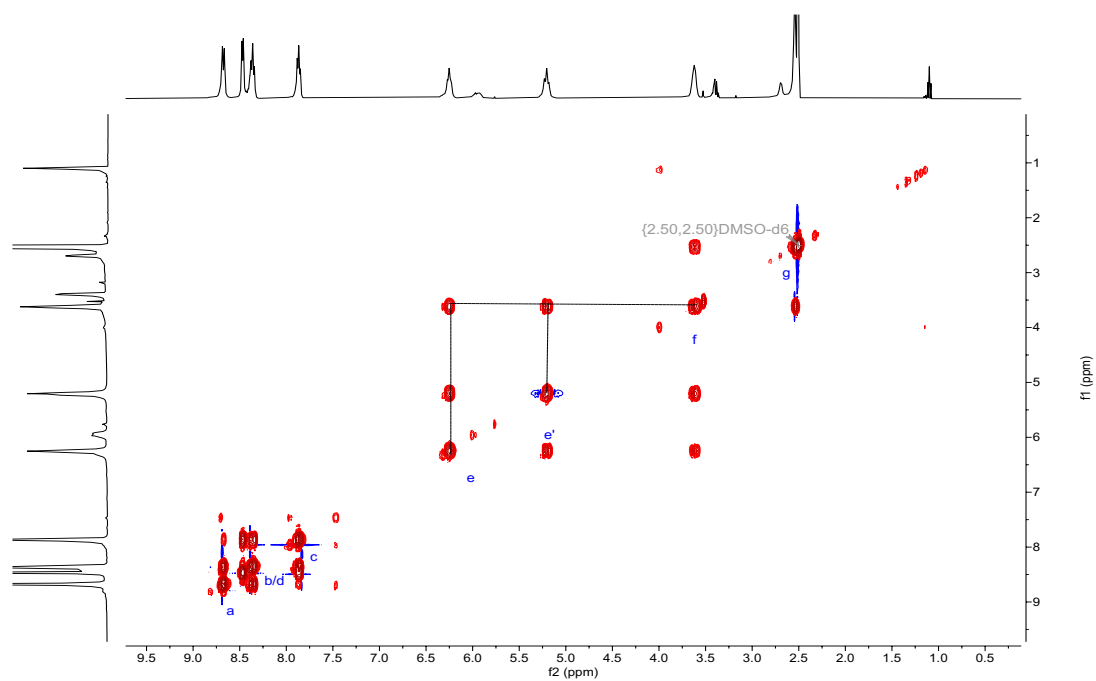

Figure S11. 2D COSY NMR of **2a** ( $\text{DMSO-}d_6$ , 298 K)

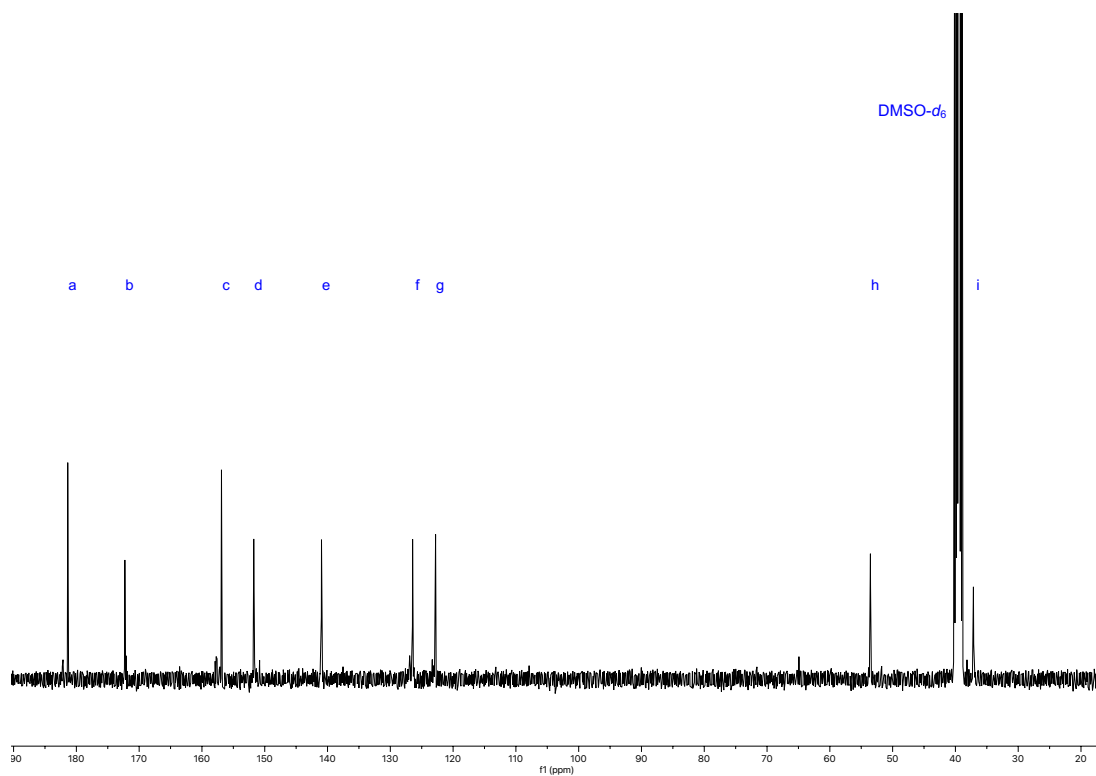

Figure S12.  $^{13}\text{C}\{^1\text{H}\}$  NMR of **2a** ( $\text{DMSO-}d_6$ , 298 K)

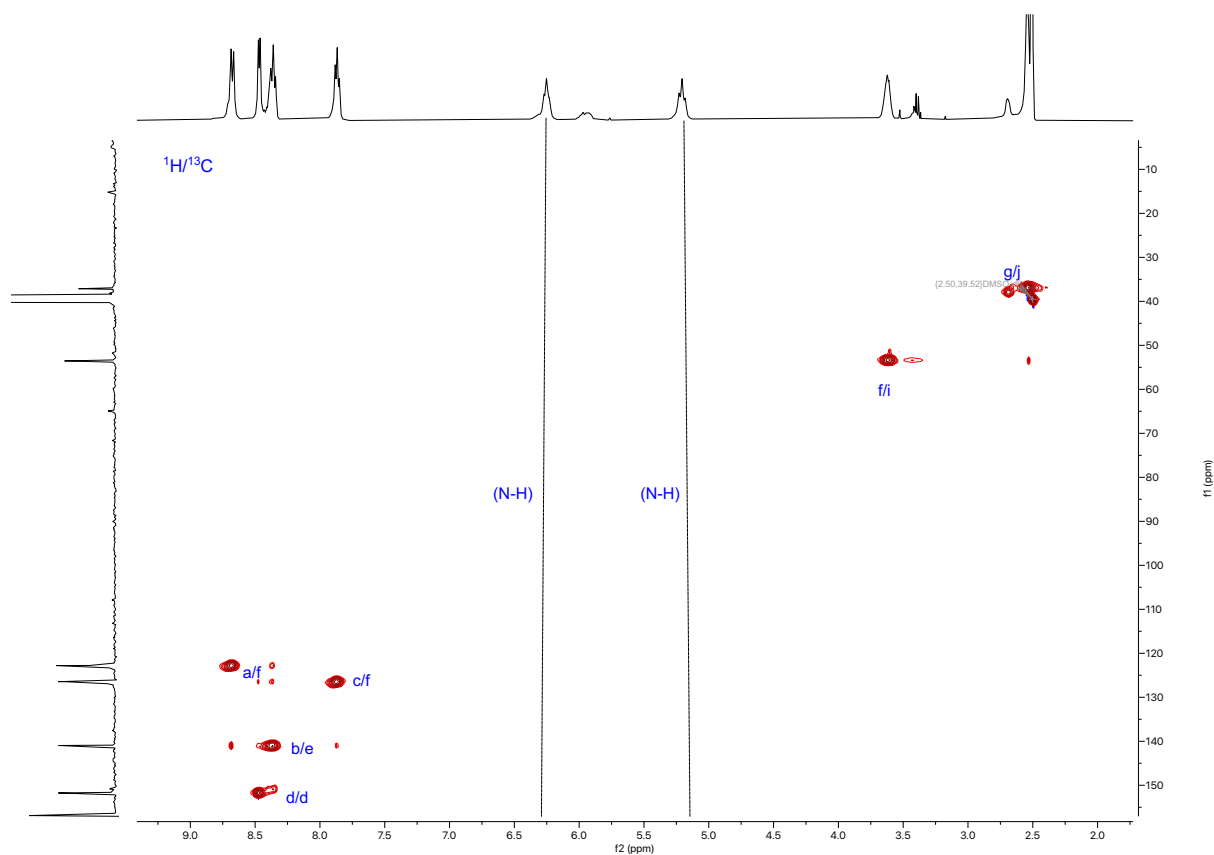

Figure S13. 2D HSQC NMR of **2a** ( $\text{DMSO-}d_6$ , 298 K)

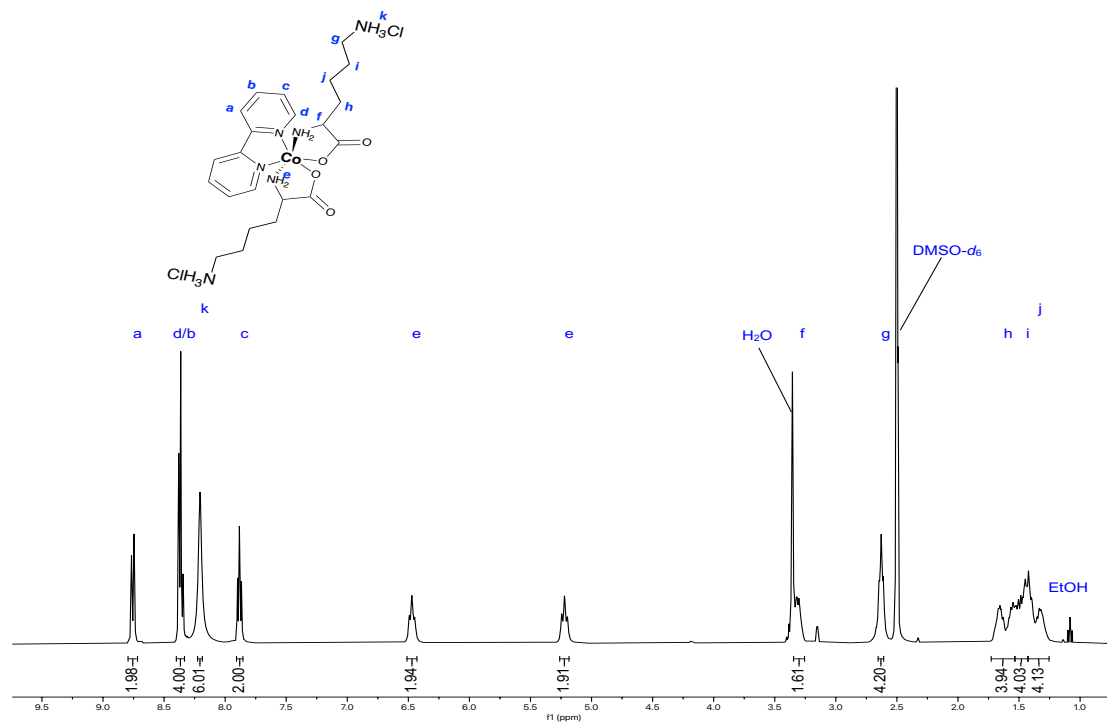

Figure S14.  $^1\text{H}$  NMR of **3** in ( $\text{DMSO-}d_6$ , 298 K)

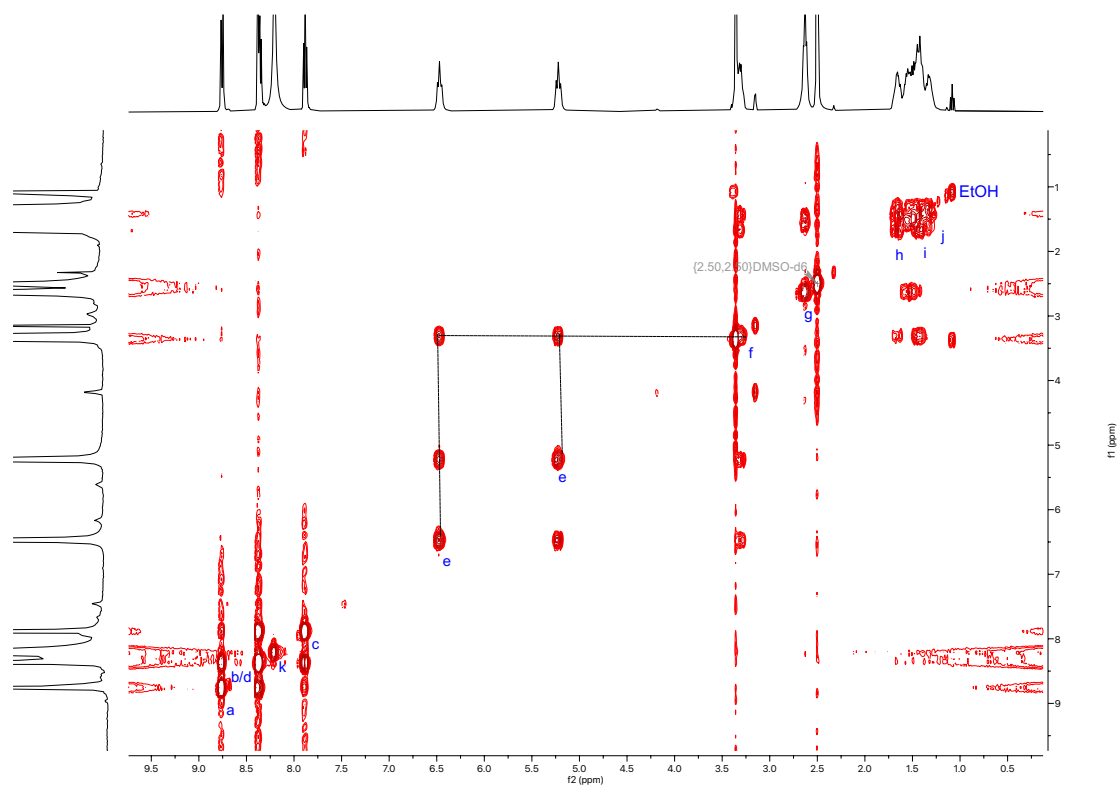

Figure S15. 2D COSY NMR of **3** ( $\text{DMSO-}d_6$ , 298 K)

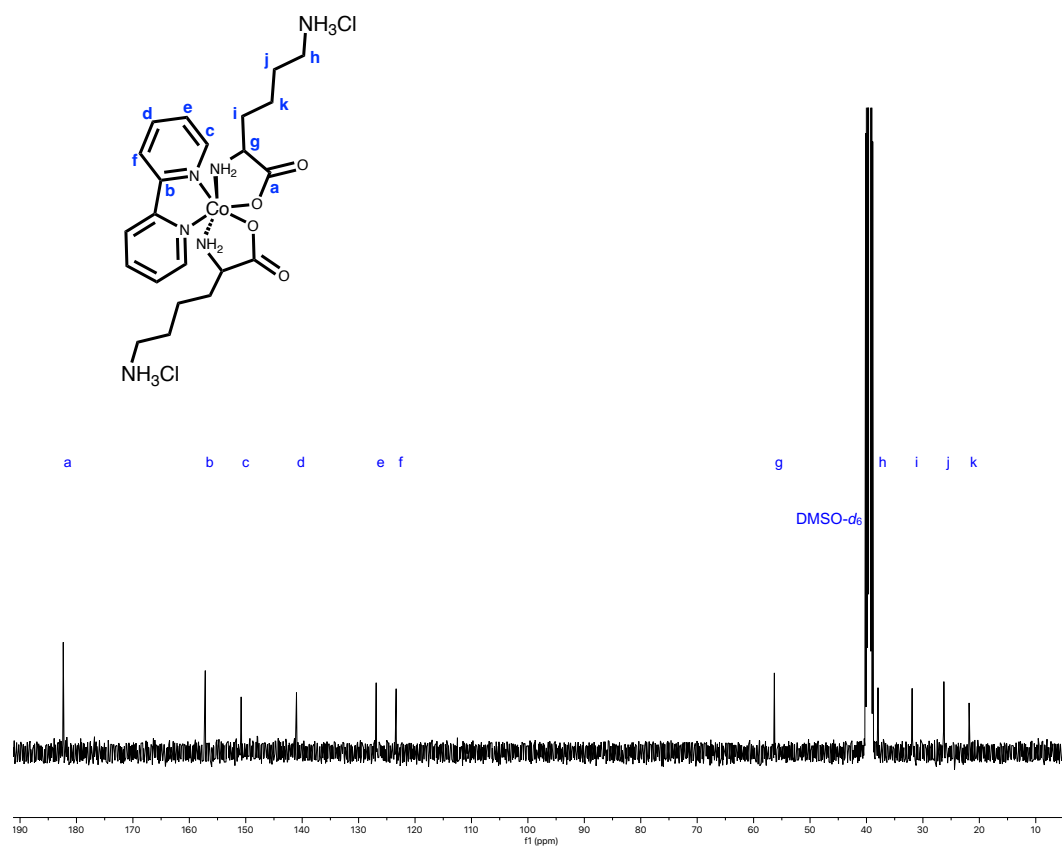

Figure S16.  $^{13}\text{C}\{^1\text{H}\}$  NMR of **3** (DMSO- $d_6$ , 298 K)

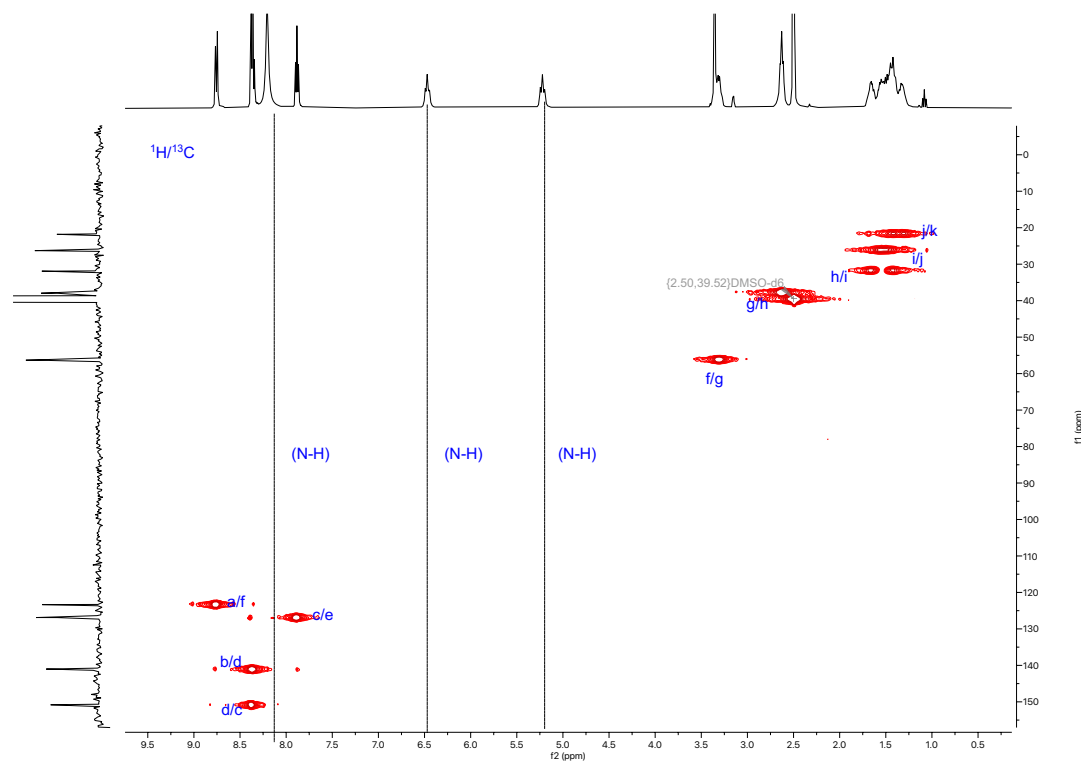

Figure S17. 2D HSQC NMR of **3** (DMSO- $d_6$ , 298 K)

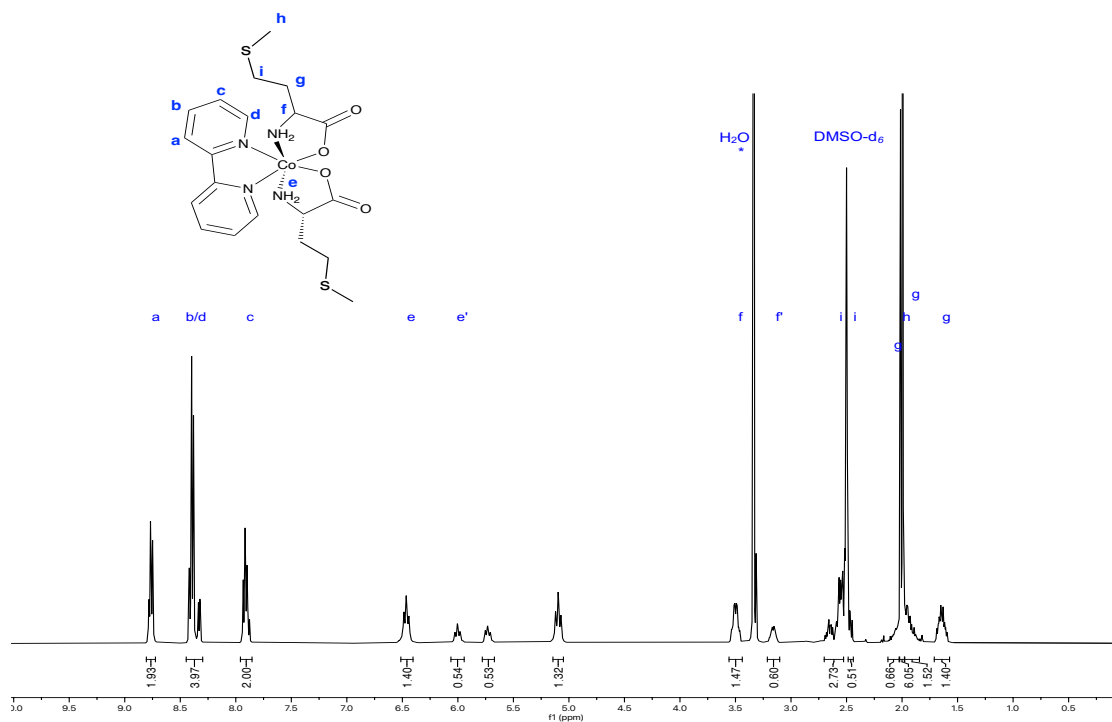

Figure S18.  $^1\text{H}$  NMR of **4** in ( $\text{DMSO-}d_6$ , 298 K) mixture of diastereomers major product  $\Delta$ -*RR/A-SS* and minor product  $\Delta$ -*SS/A-RR* 2.4:1

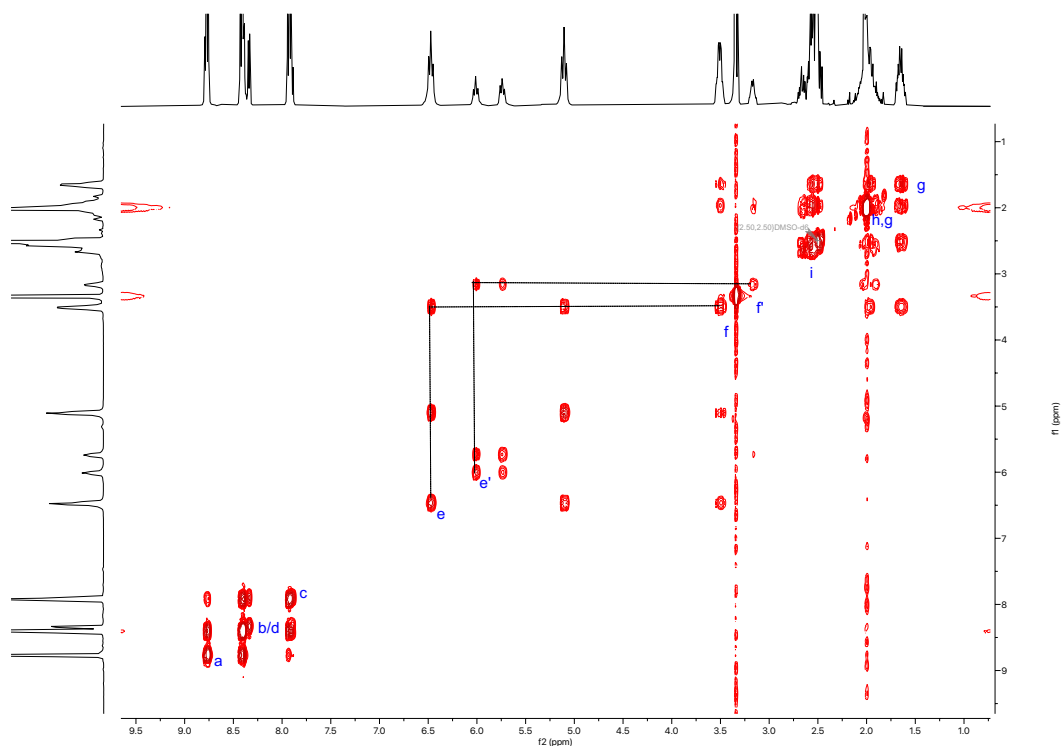

Figure S19. 2D COSY NMR of **4** ( $\text{DMSO-}d_6$ , 298 K)

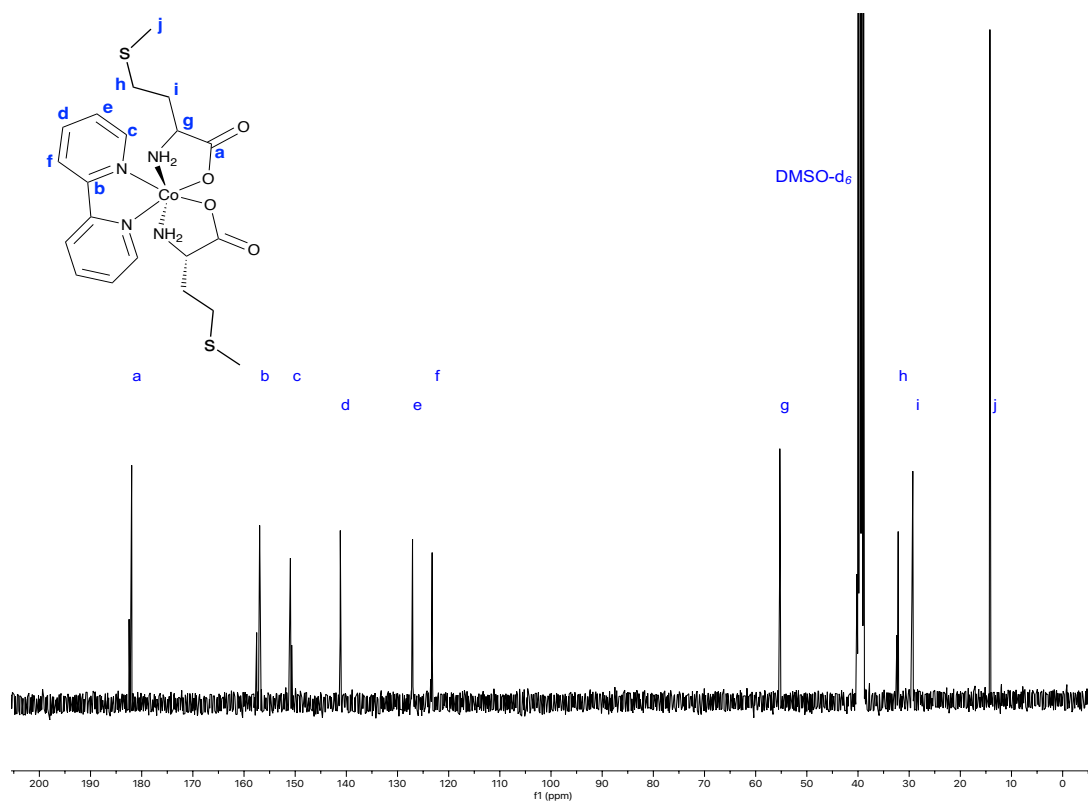

Figure S20.  $^{13}\text{C}\{^1\text{H}\}$  NMR of **4** (DMSO- $d_6$ , 298 K)

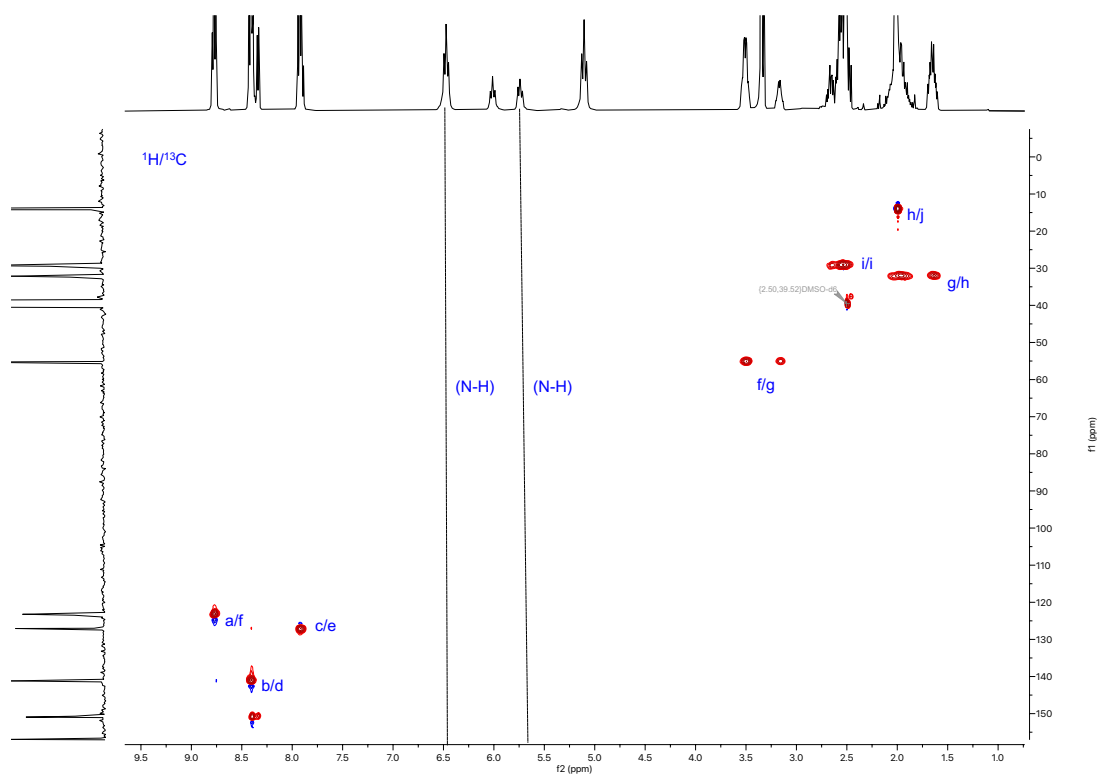

Figure S21. 2D HSQC NMR of **4** (DMSO- $d_6$ , 298 K)

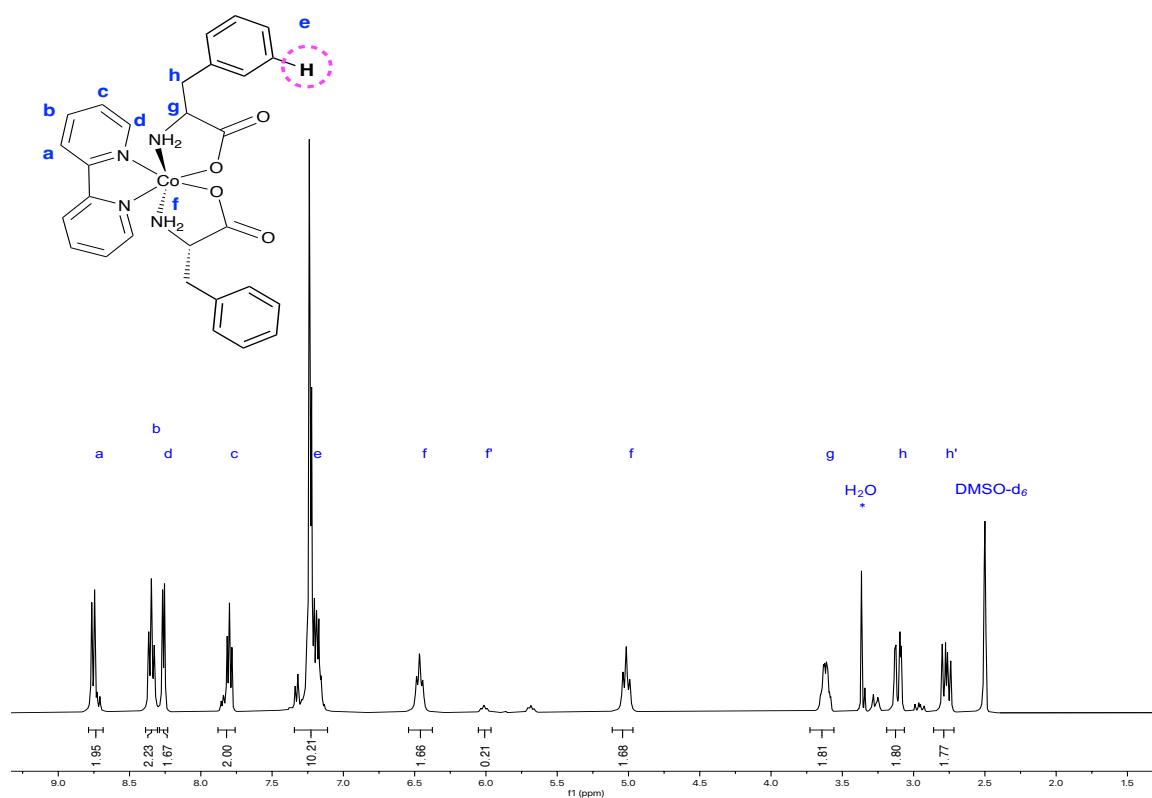

Figure S22.  $^1\text{H}$  NMR of **5** in ( $\text{DMSO-}d_6$ , 298 K) precise signal integration could not be obtained for protons **e** due to overlapping with neighboring signal. In this case signals were integrated together. 4.15:1

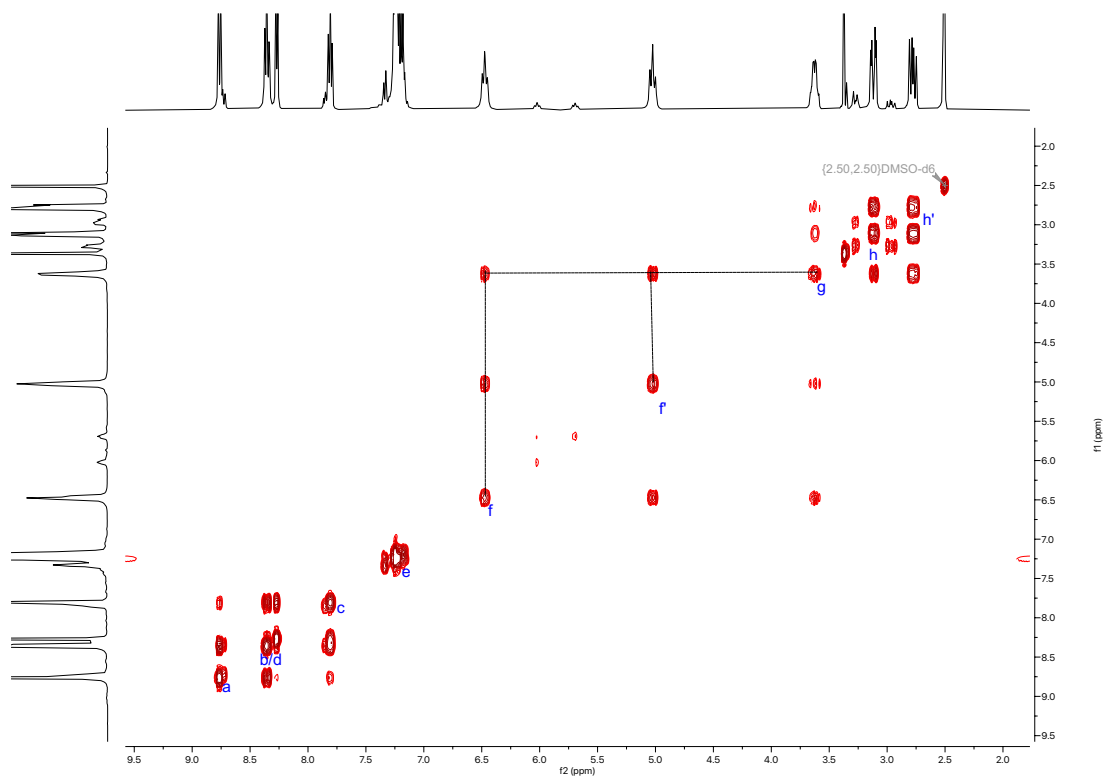

Figure S23. 2D COSY NMR of **5** ( $\text{DMSO-}d_6$ , 298 K)



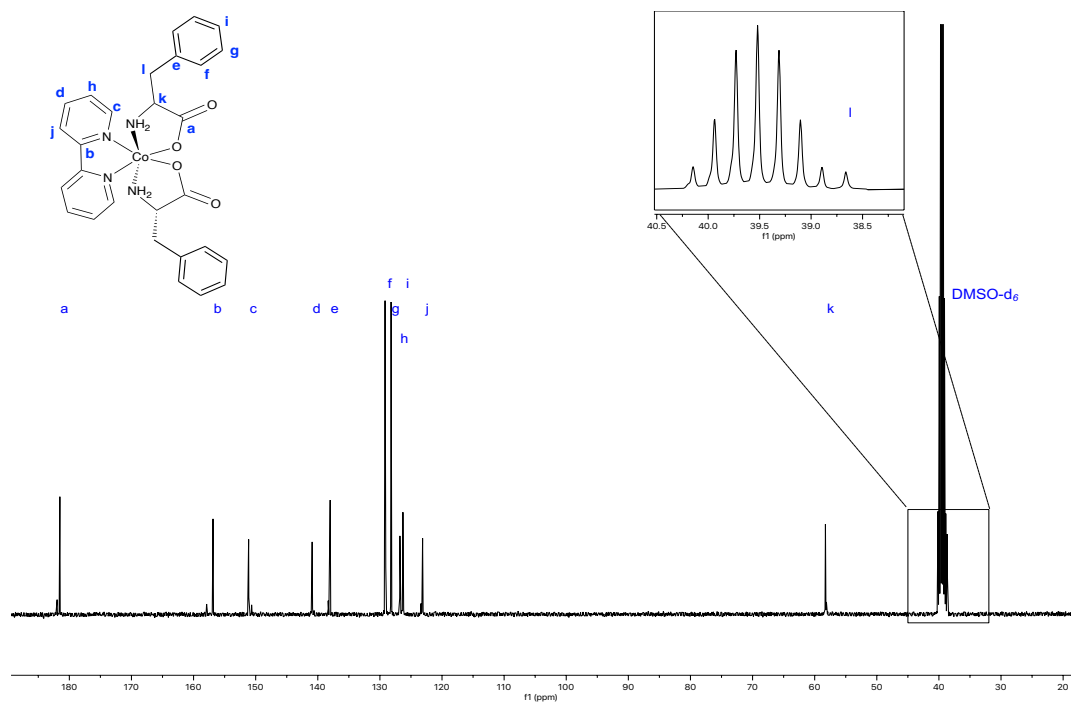

Figure S24.  $^{13}\text{C}\{^1\text{H}\}$  NMR of **5** (DMSO- $d_6$ , 298 K)

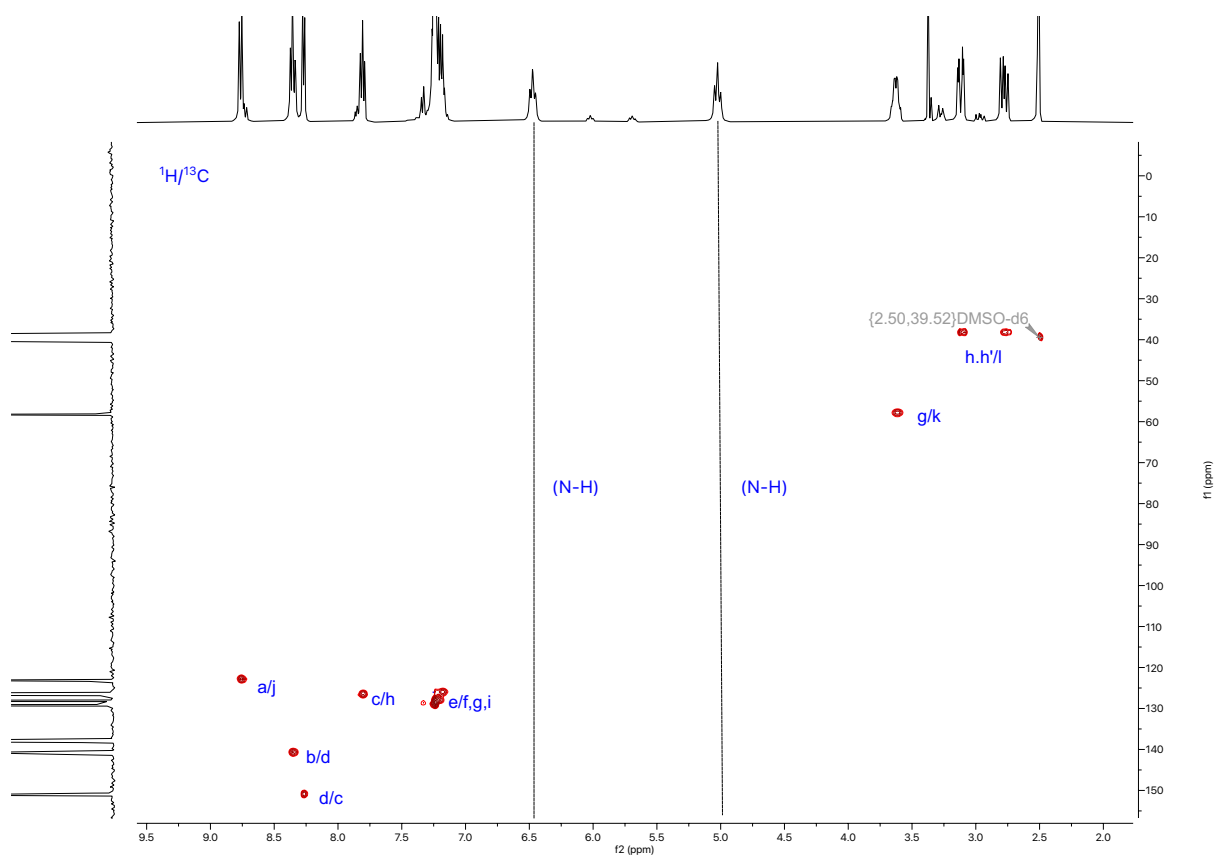

Figure S25. 2D HSQC NMR of **5** (DMSO- $d_6$ , 298 K)

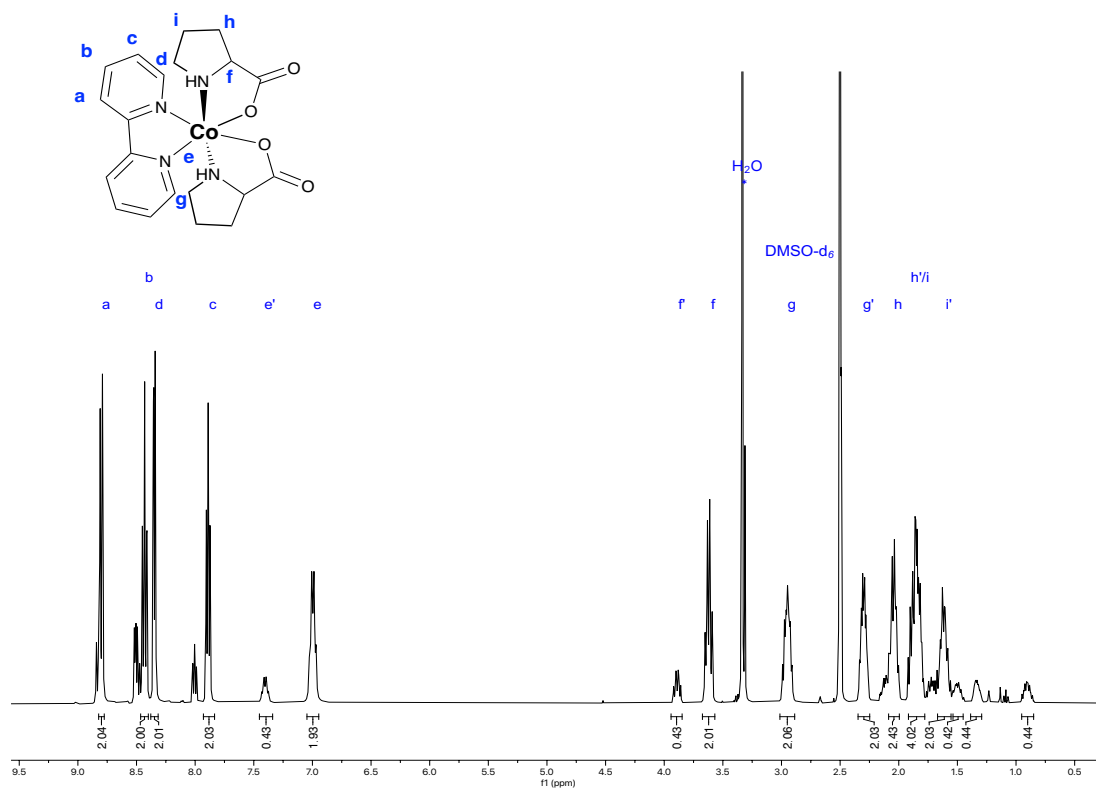

Figure S26.  $^1\text{H}$  NMR of **6** in ( $\text{DMSO-}d_6$ , 298 K) 4.7:1

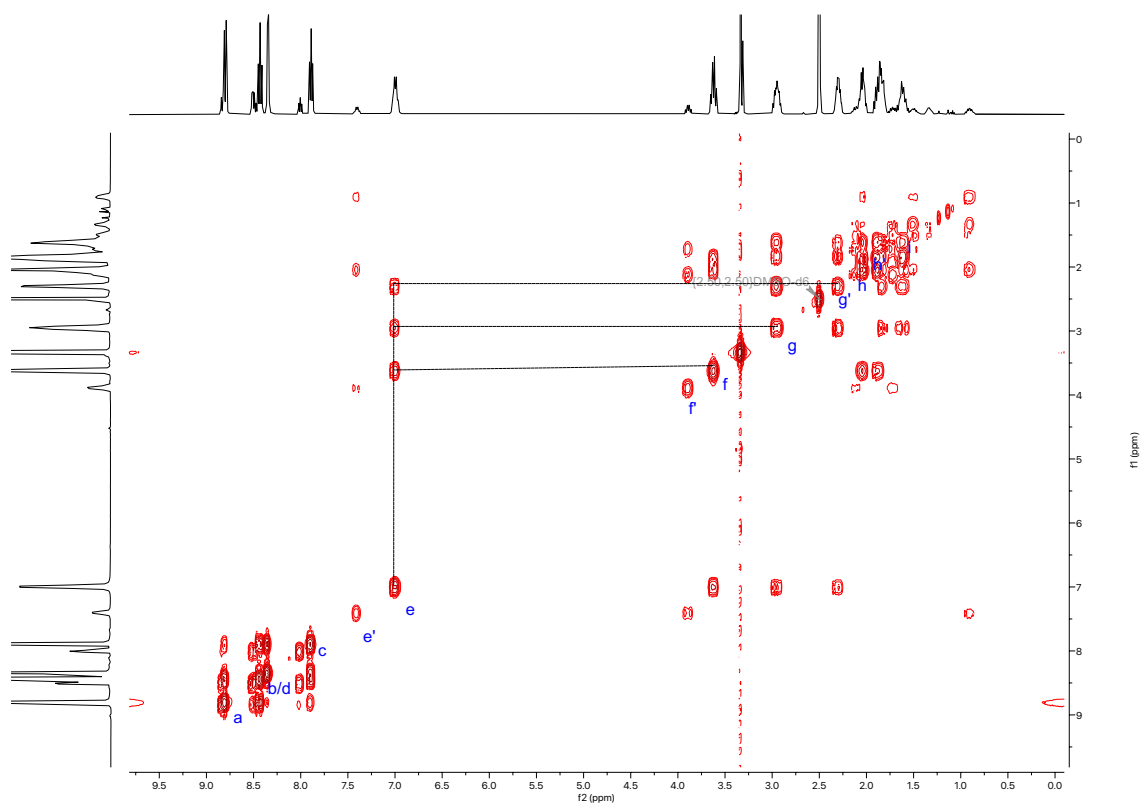

Figure S27. 2D COSY NMR of **6** ( $\text{DMSO-}d_6$ , 298 K)

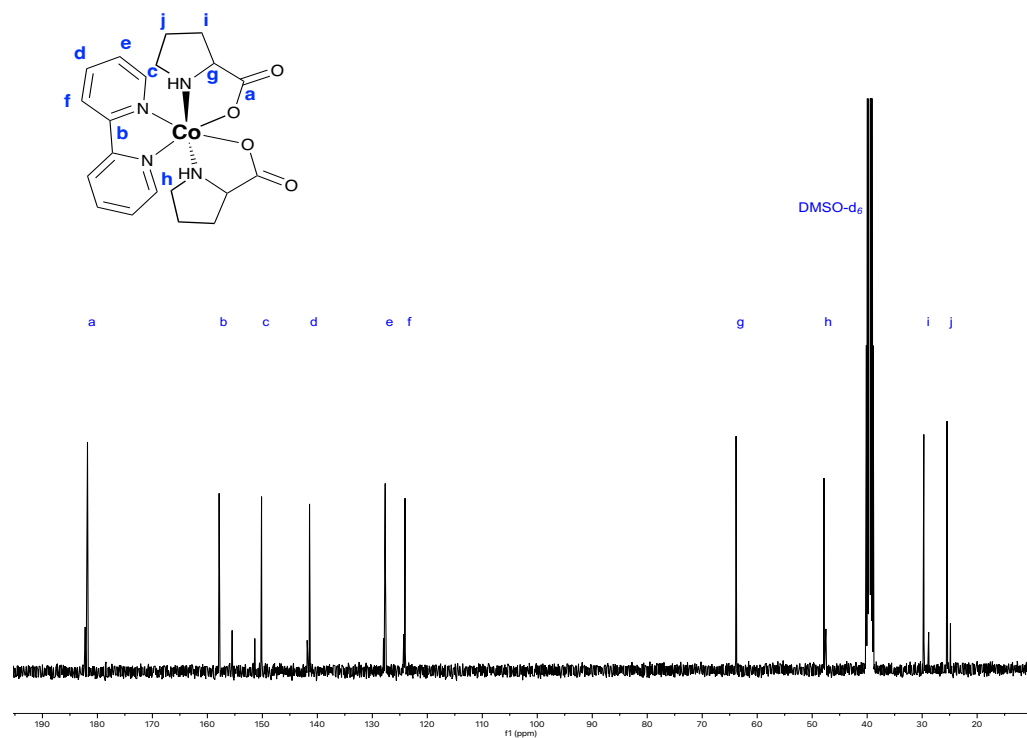

Figure S28.  $^{13}\text{C}\{^1\text{H}\}$  NMR of **6** ( $\text{DMSO-}d_6$ , 298 K)

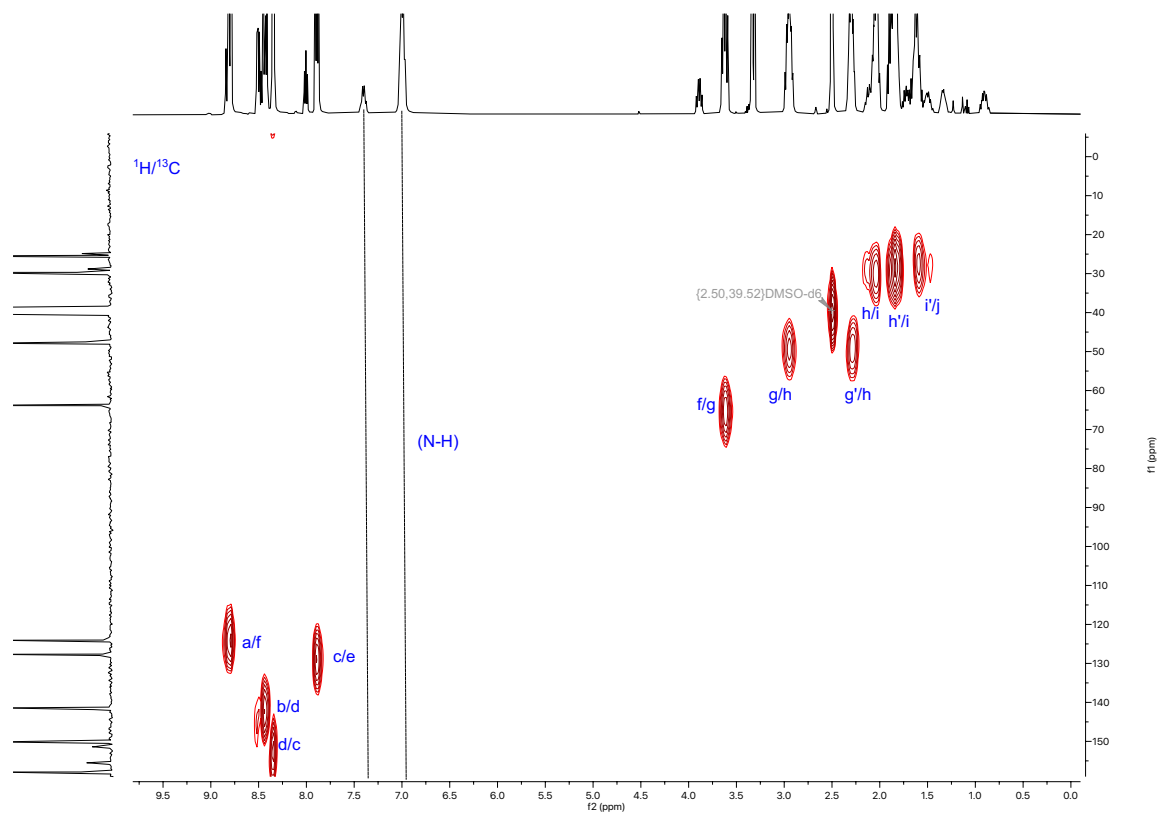

Figure S29. 2D HSQC NMR of **6** ( $\text{DMSO-}d_6$ , 298 K)

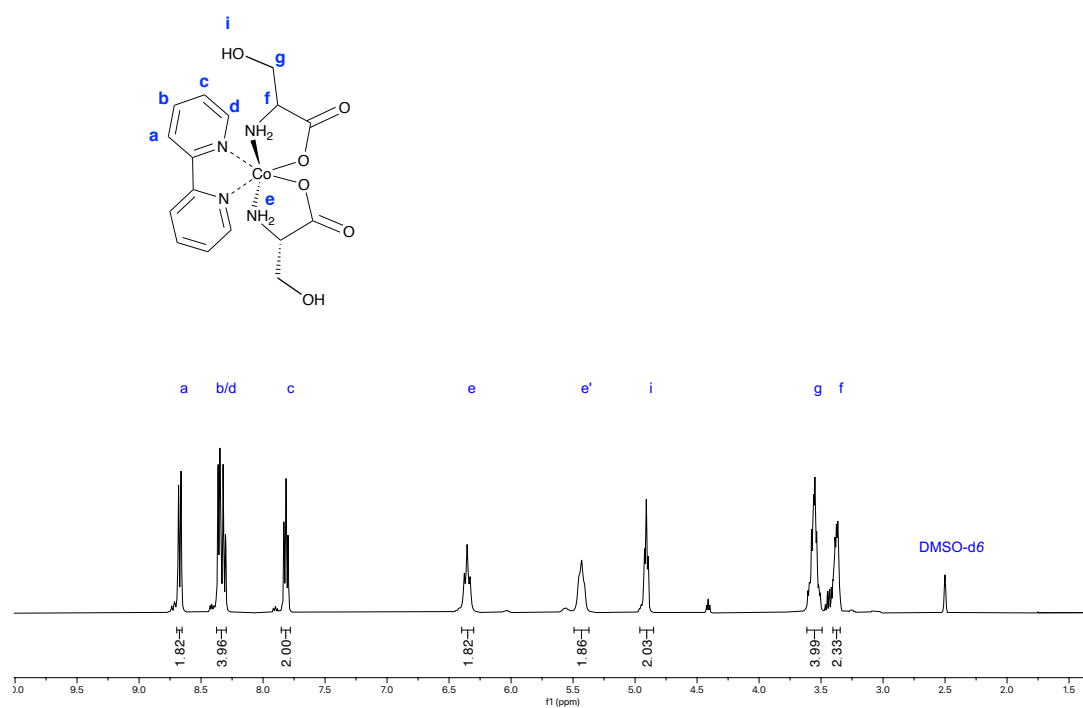

Figure S30.  $^1\text{H}$  NMR of **7** in ( $\text{DMSO-}d_6$ , 298 K)

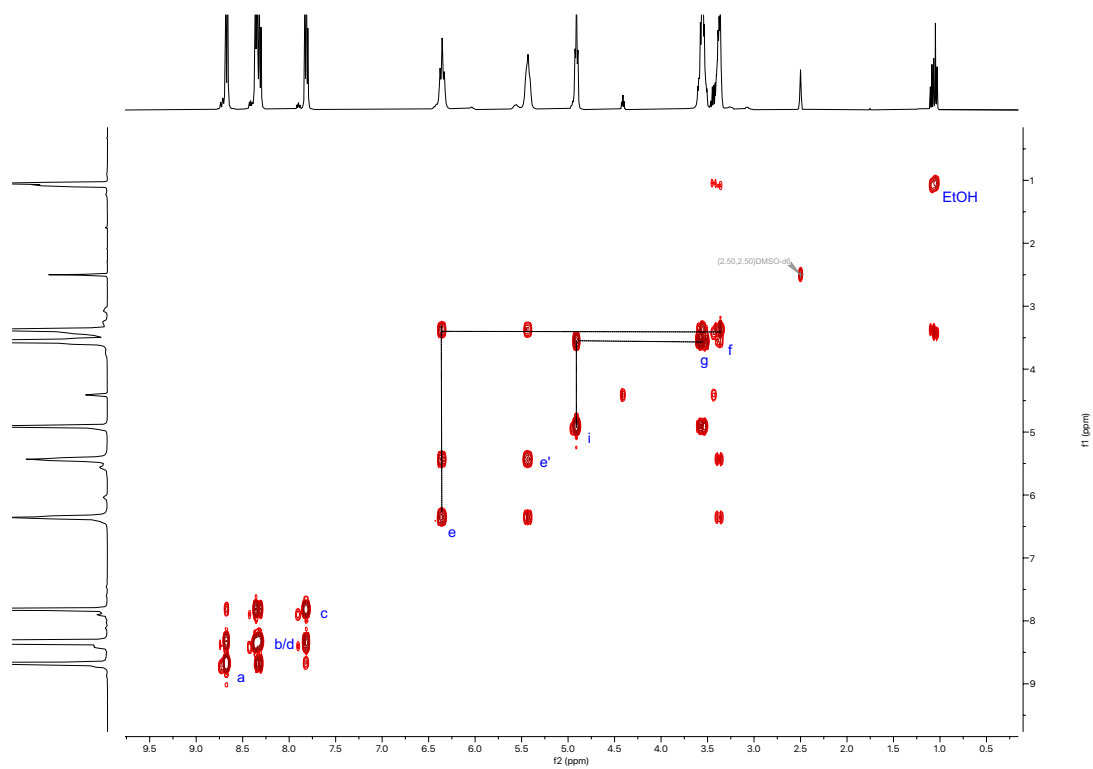

Figure S31. 2D COSY NMR of **7** ( $\text{DMSO-}d_6$ , 298 K)

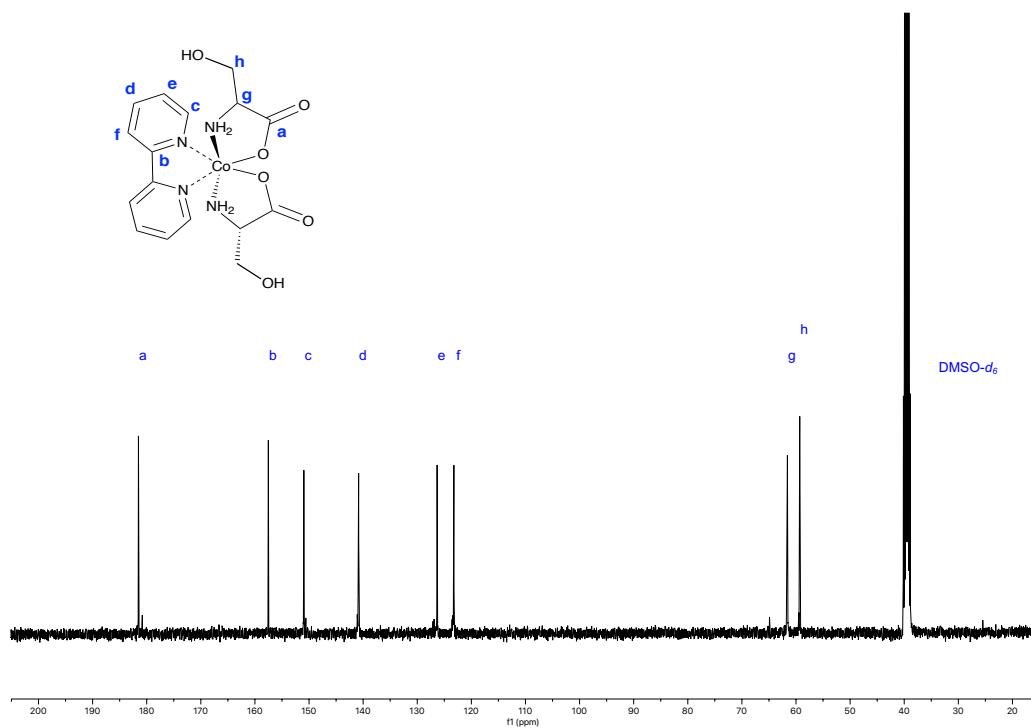

Figure S32.  $^{13}\text{C}\{^1\text{H}\}$  NMR of **7** (DMSO- $d_6$ , 298 K)

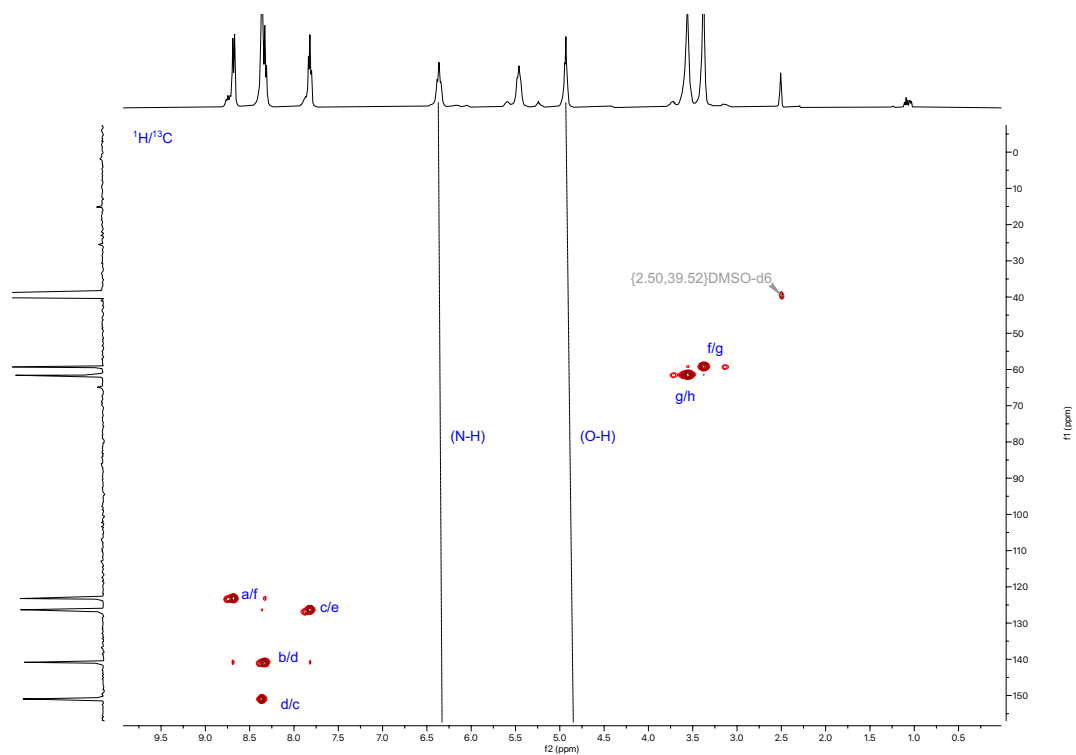

Figure S33. 2D HSQC NMR of **7** (DMSO- $d_6$ , 298 K)

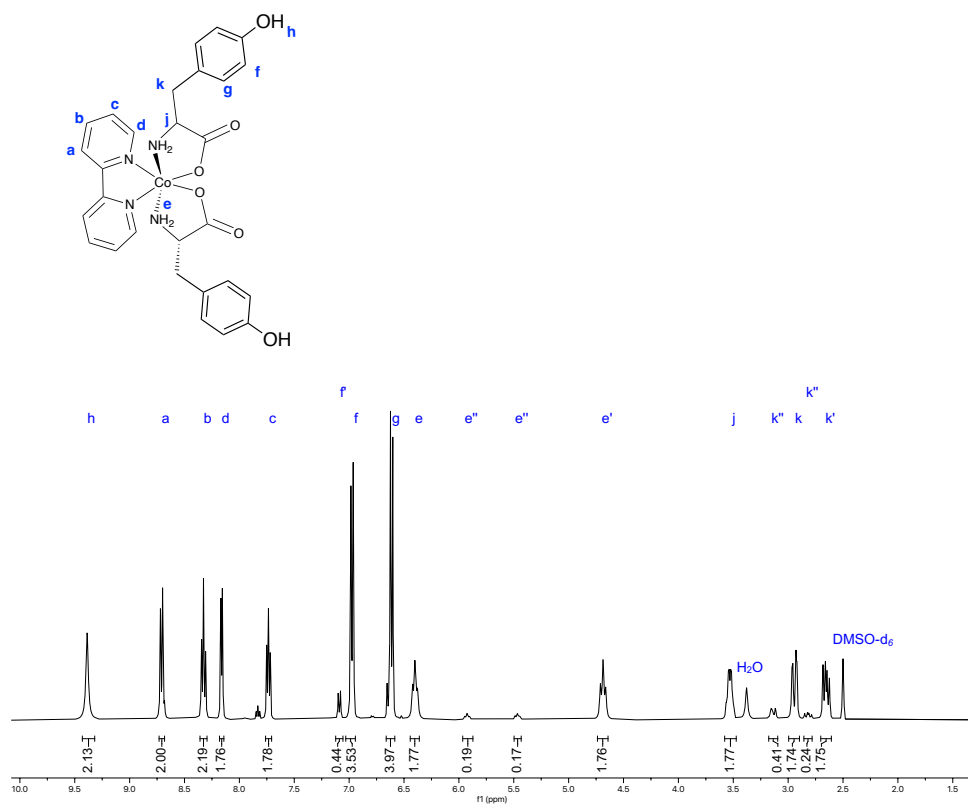

Figure S34.  $^1\text{H}$  NMR of **8** in ( $\text{DMSO-}d_6$ , 298 K) mixture of diastereomers major product  $\Delta$ -*RR/A-SS* and minor product  $\Delta$ -*SS/A-RR* 8:1:1

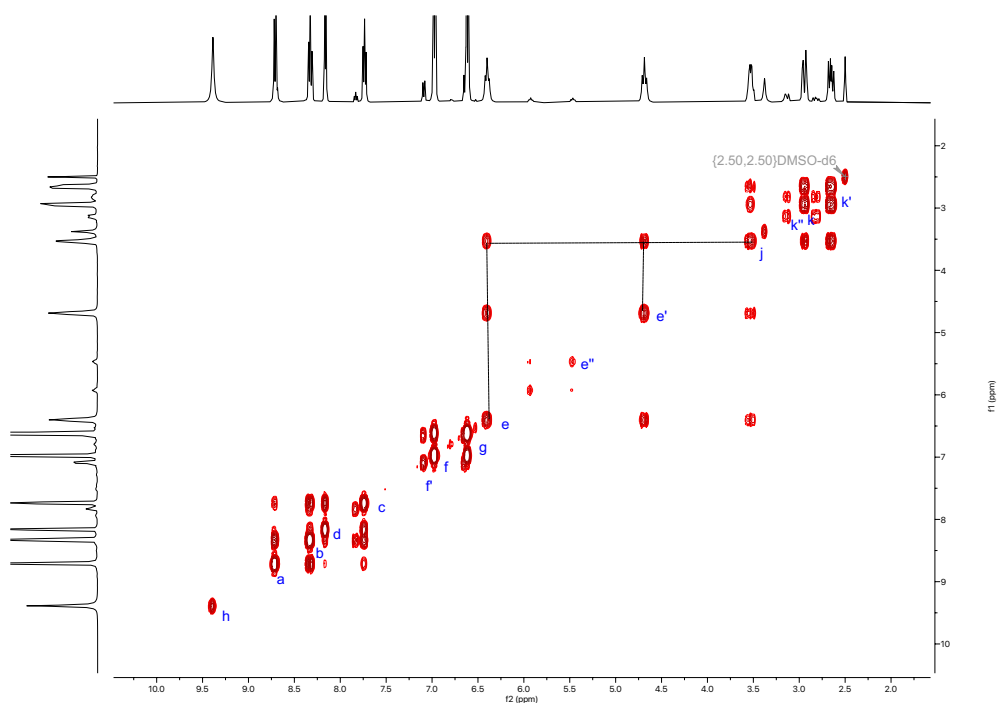

Figure S35. 2D COSY NMR of **8** ( $\text{DMSO-}d_6$ , 298 K)

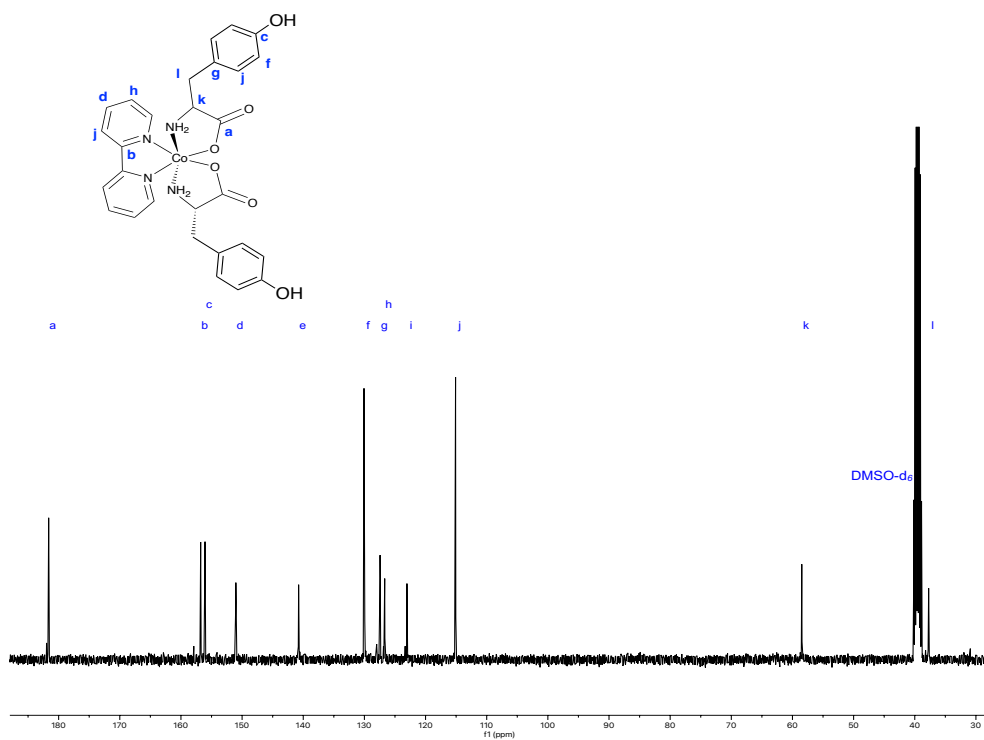

Figure S36.  $^{13}\text{C}\{^1\text{H}\}$  NMR of **8** ( $\text{DMSO-}d_6$ , 298 K)

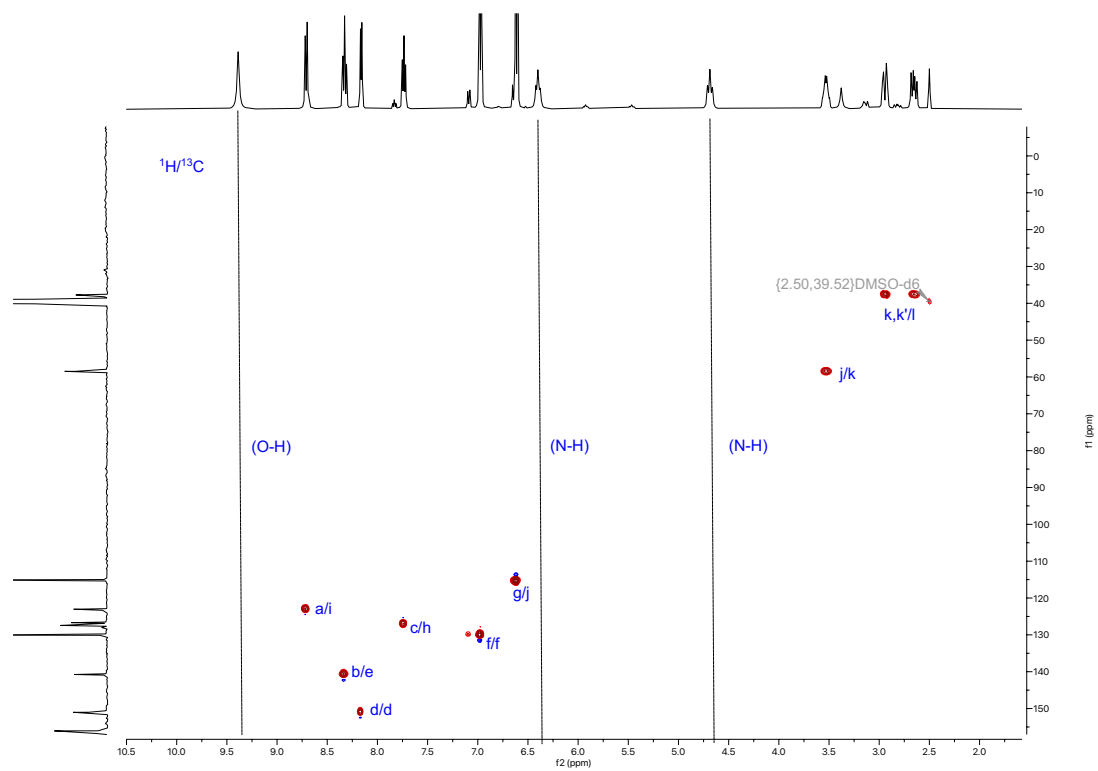

Figure S37. 2D HSQC NMR of **8** ( $\text{DMSO-}d_6$ , 298 K)

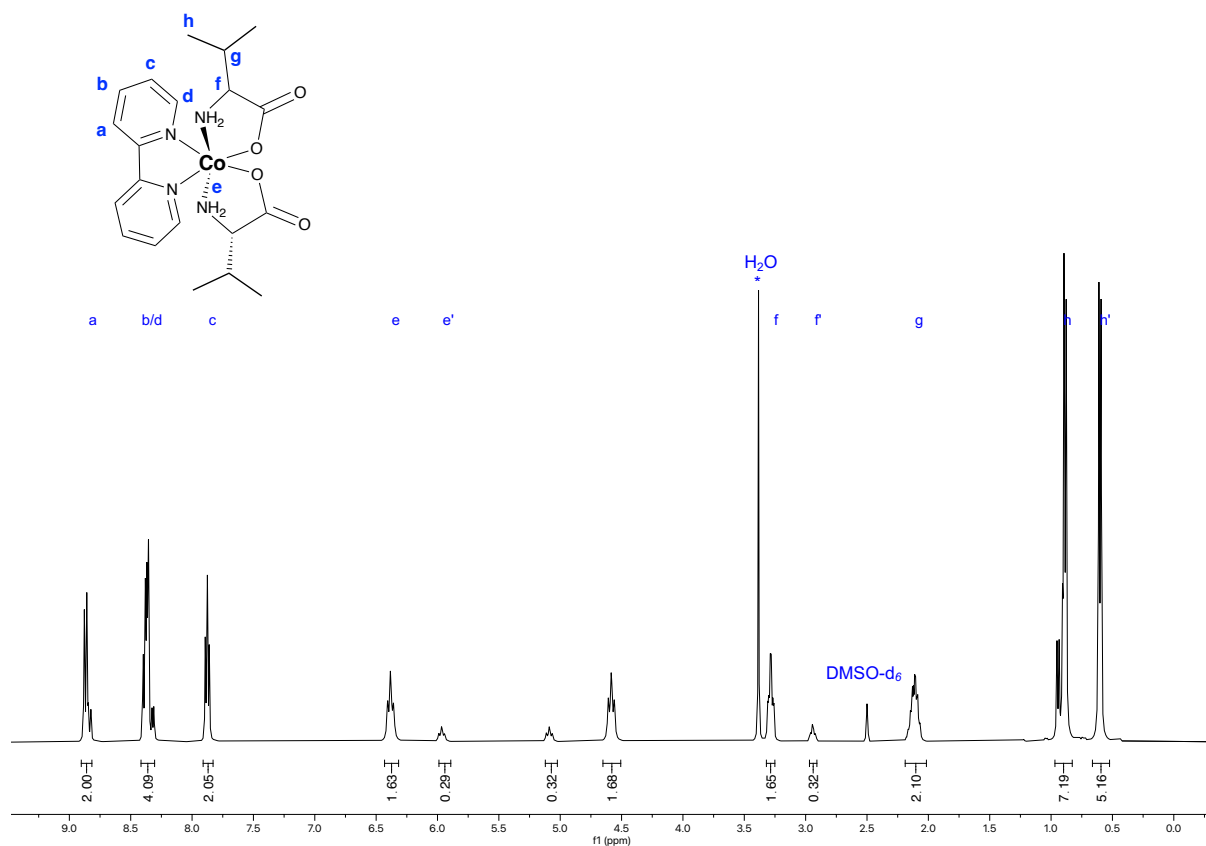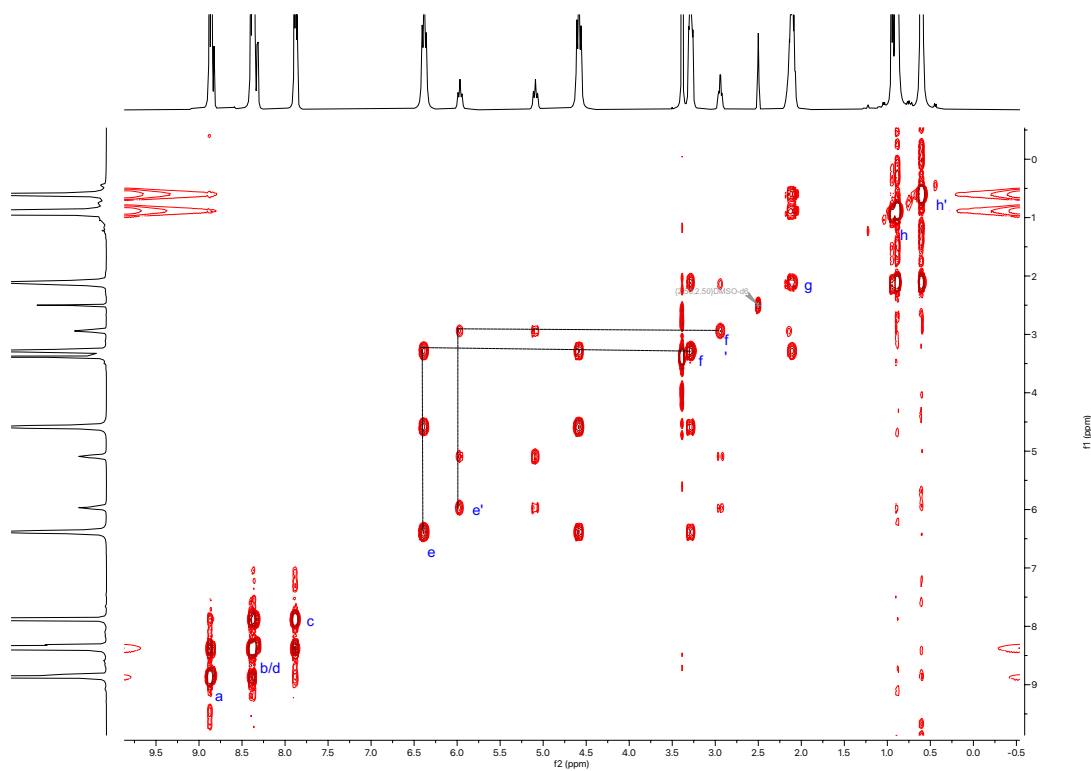



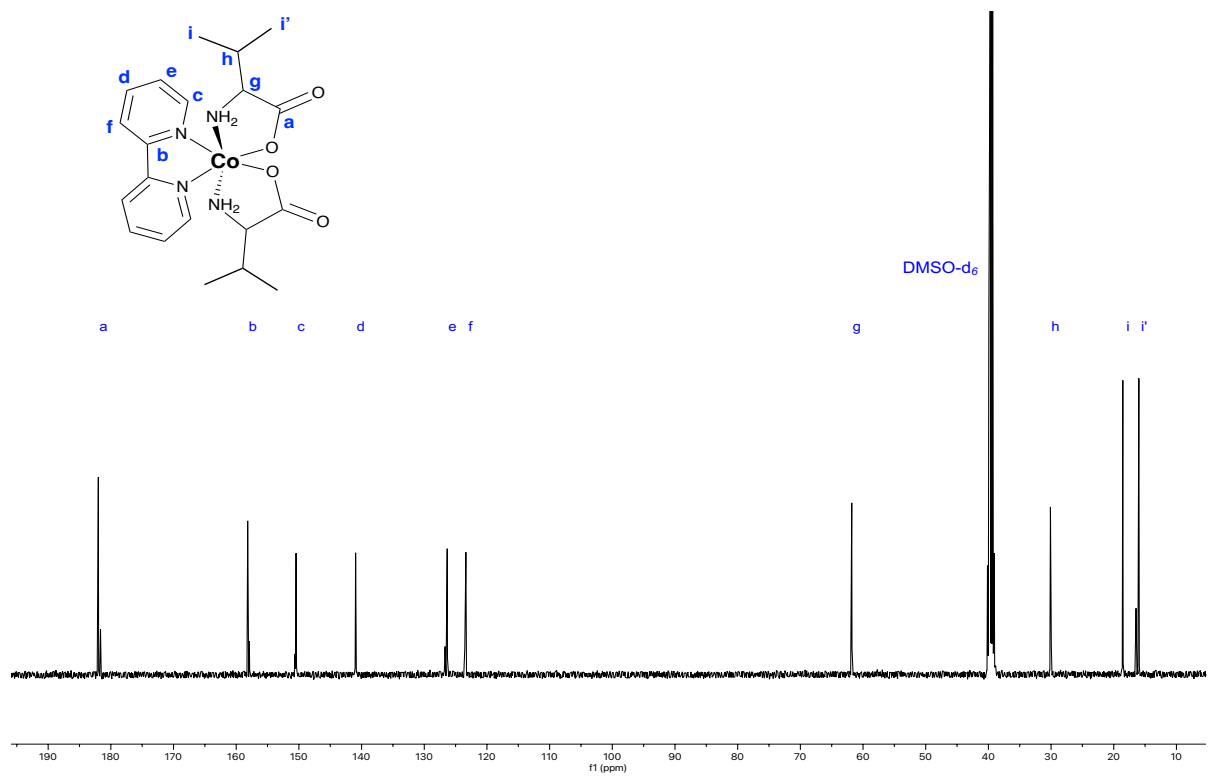

Figure S40.  $^{13}\text{C}\{^1\text{H}\}$  NMR of **9** ( $\text{DMSO-}d_6$ , 298 K)

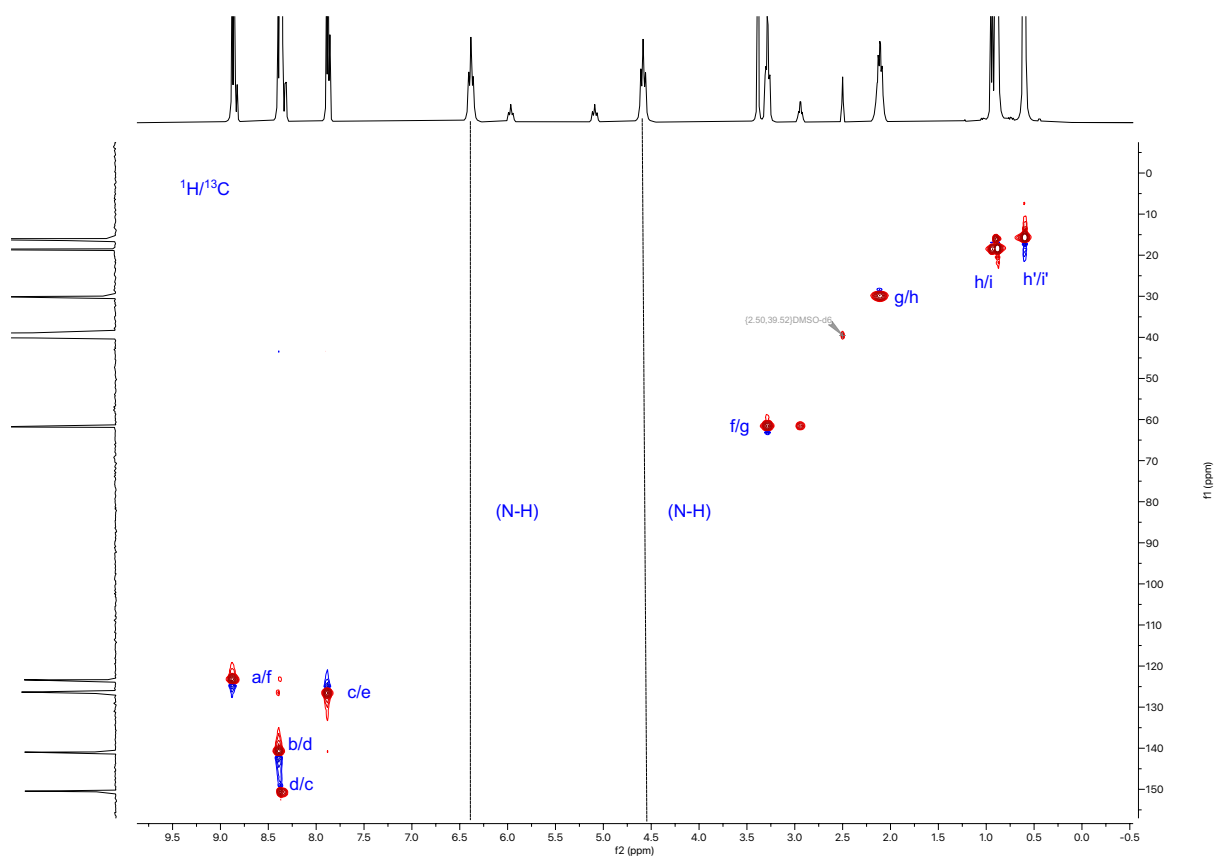

Figure S41. 2D HSQC NMR of **9** ( $\text{DMSO-}d_6$ , 298 K)

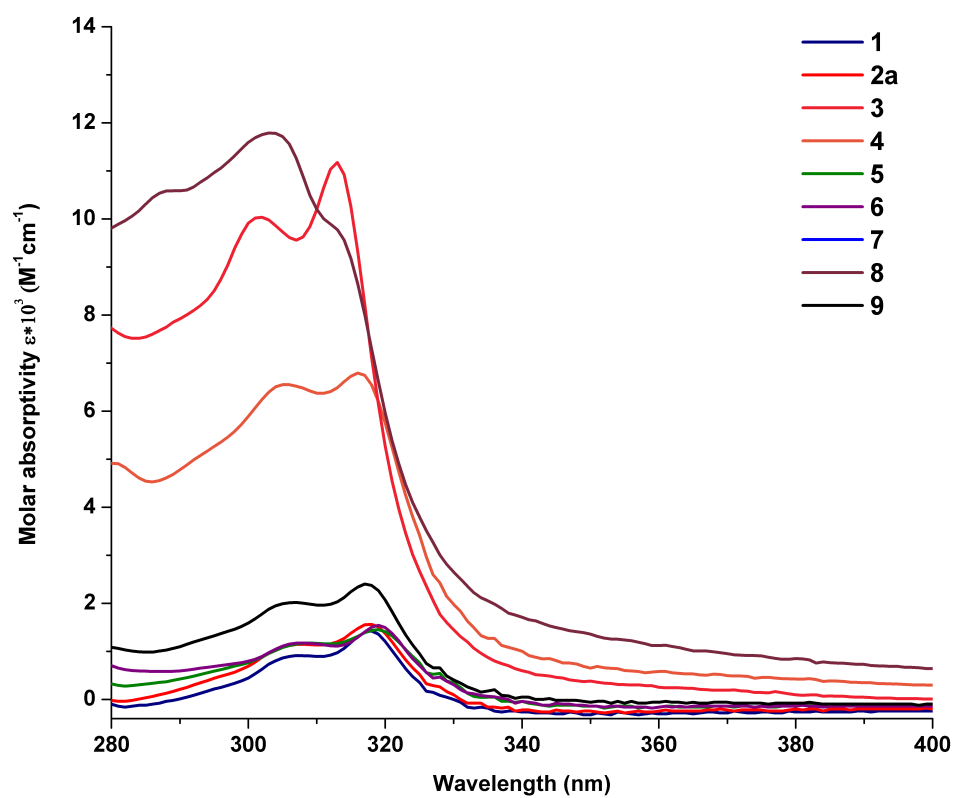

Figure S42. UV-vis absorption spectra of **1-9** in EtOH ( $1 \times 10^{-5}$  M).

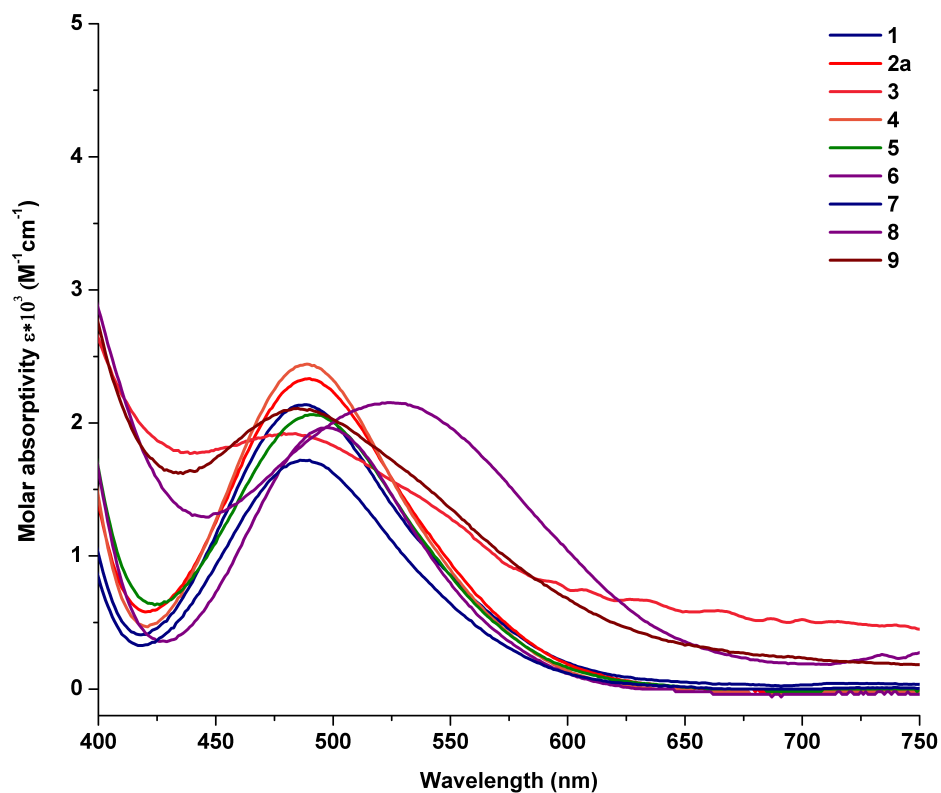

Figure S43. UV-vis absorption spectra of **1-9** in EtOH ( $1 \times 10^{-3}$  M).

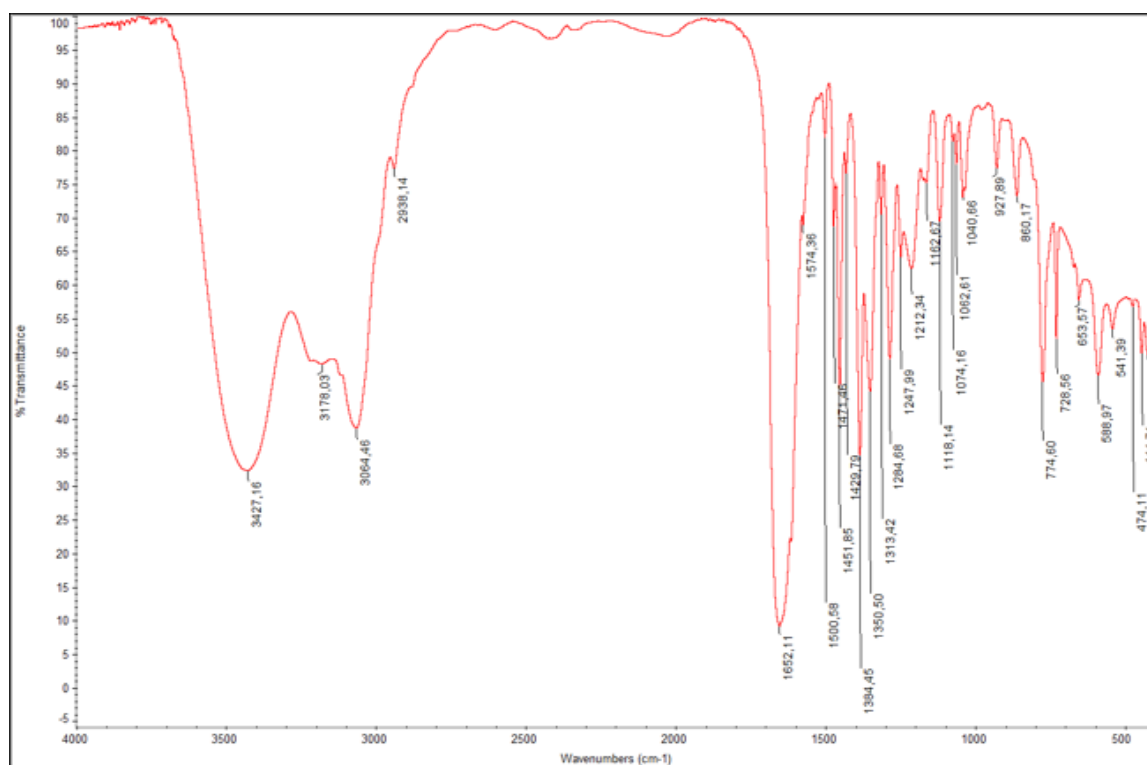

Figure S44. FT-IR of **1**

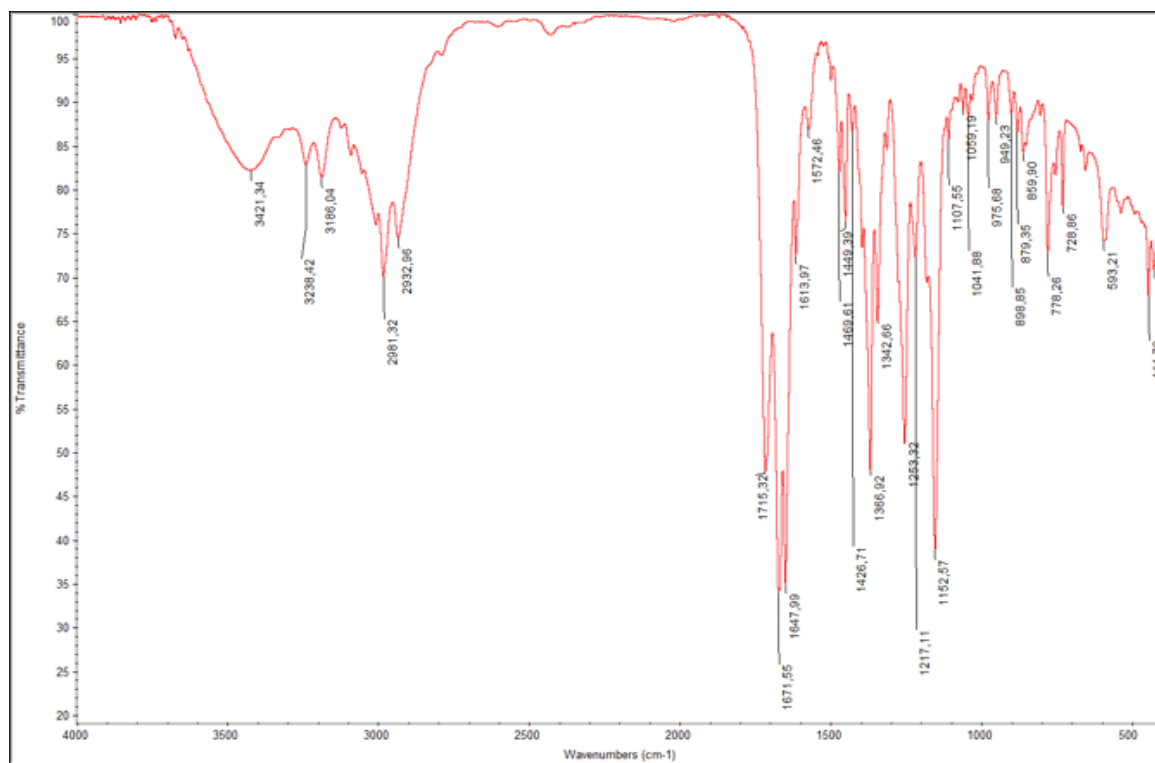

Figure S45. FT-IR of **2**

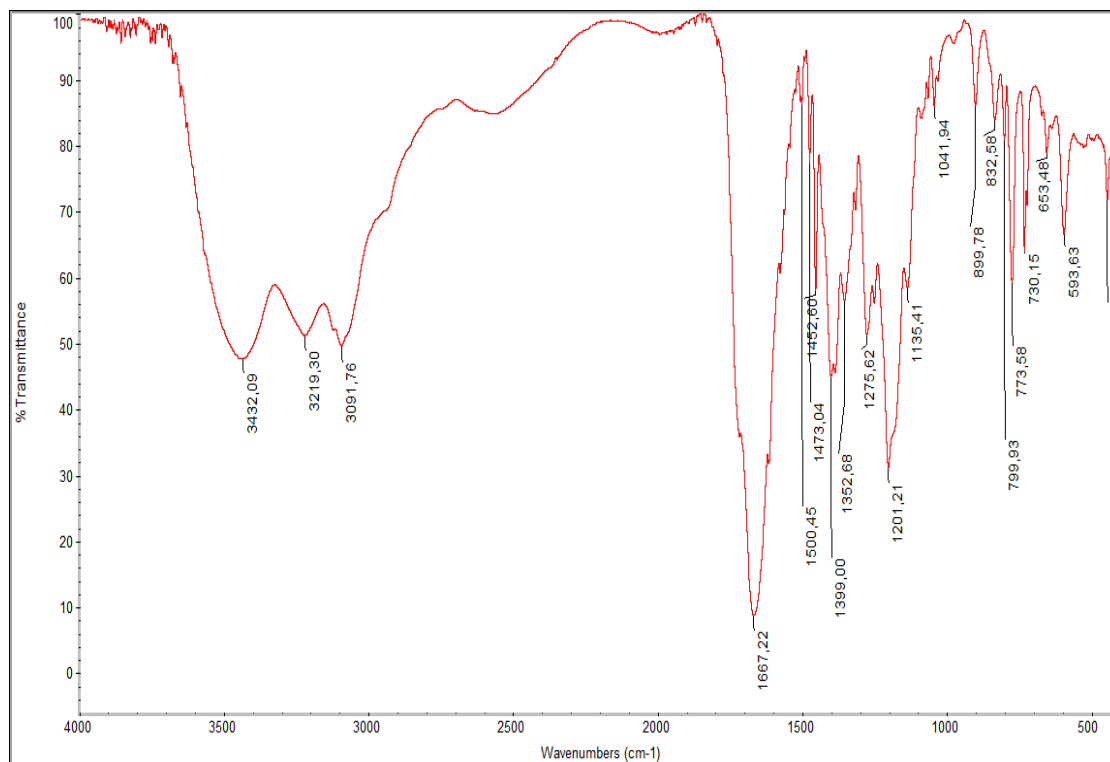

Figure S46. FT-IR of **2a**

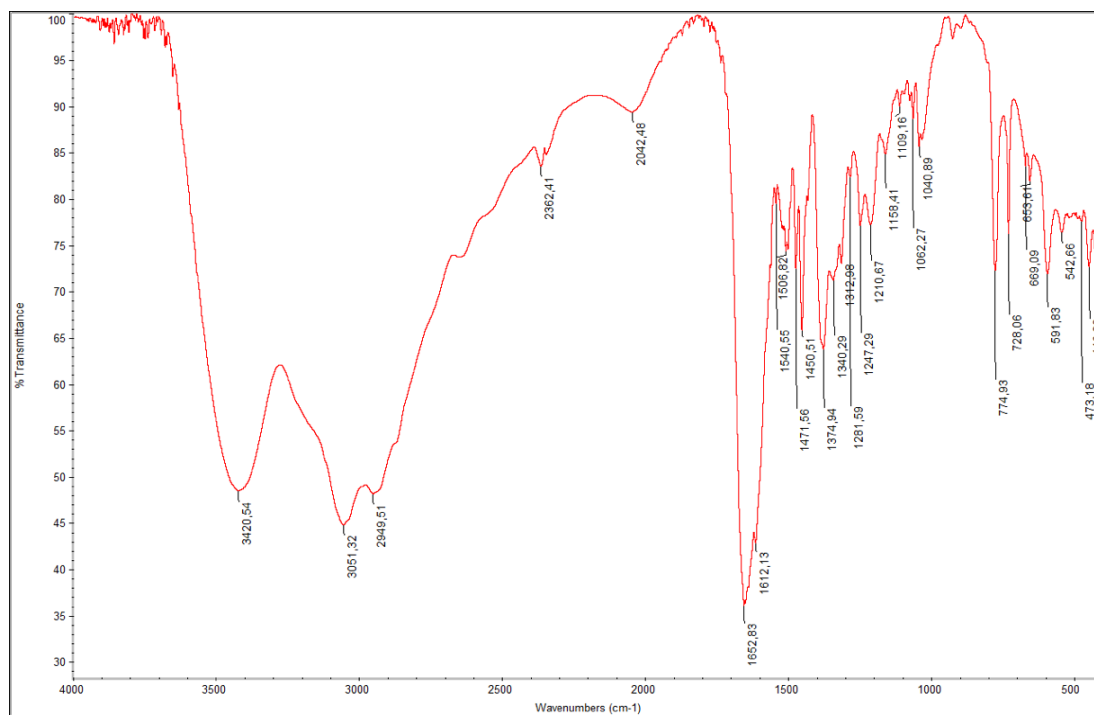

Figure S47. FT-IR of 3

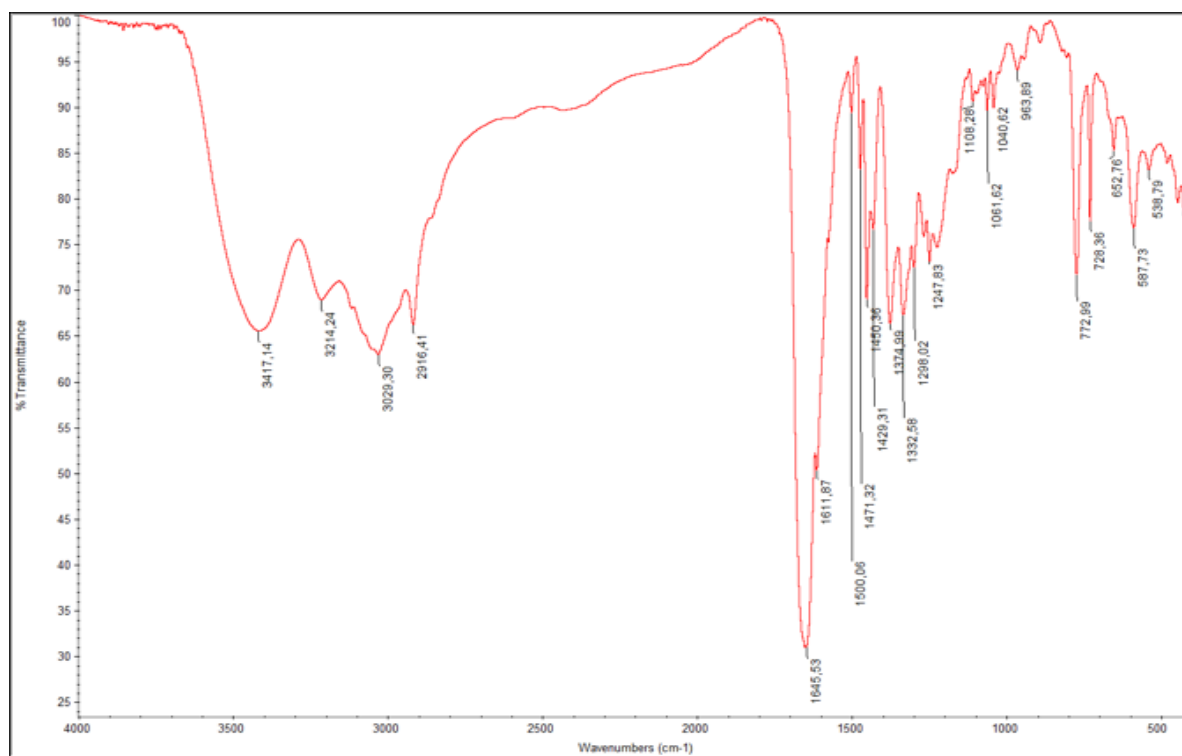

Figure S48. FT-IR of 4

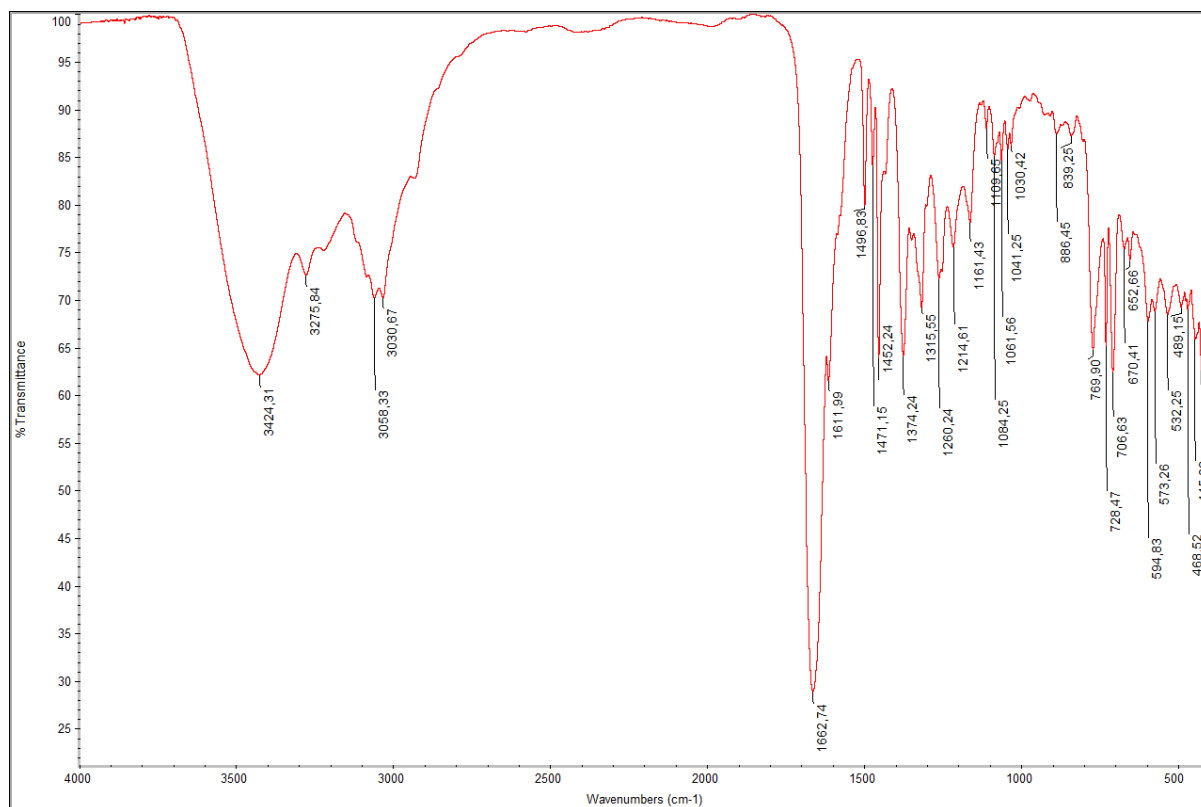

Figure S49. FT-IR of 5

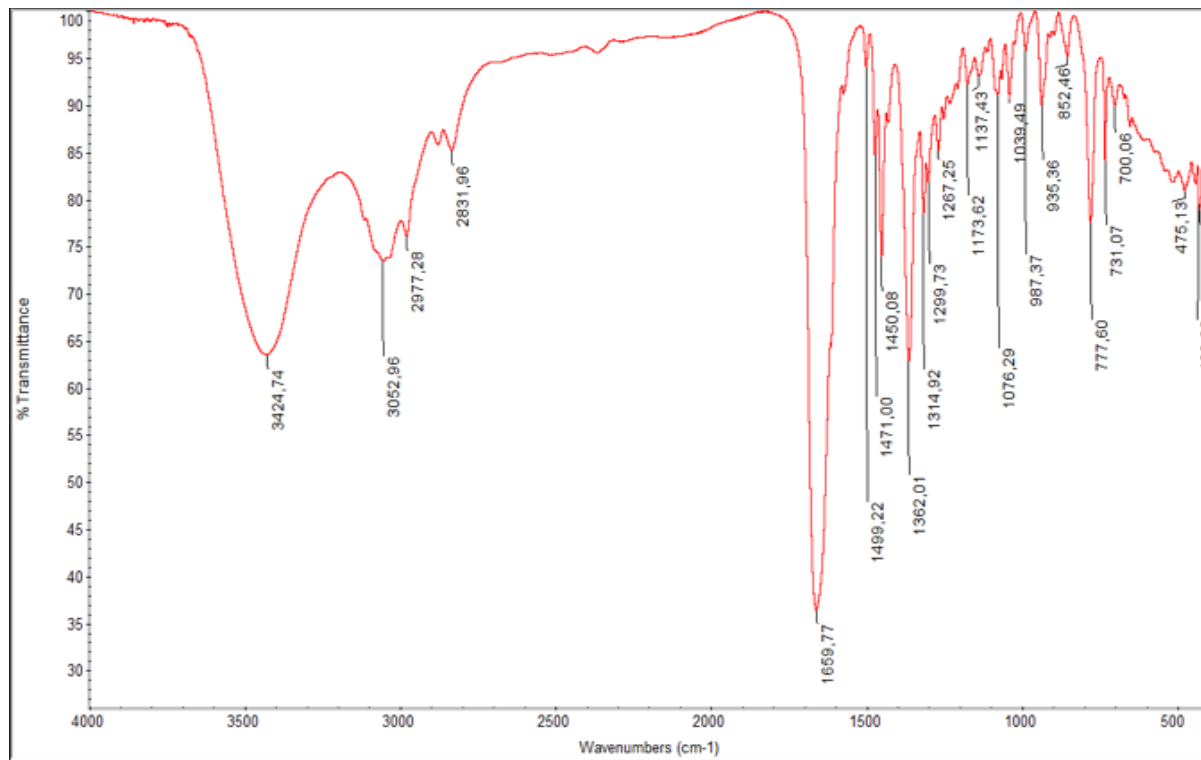

Figure S50. FT-IR of 6

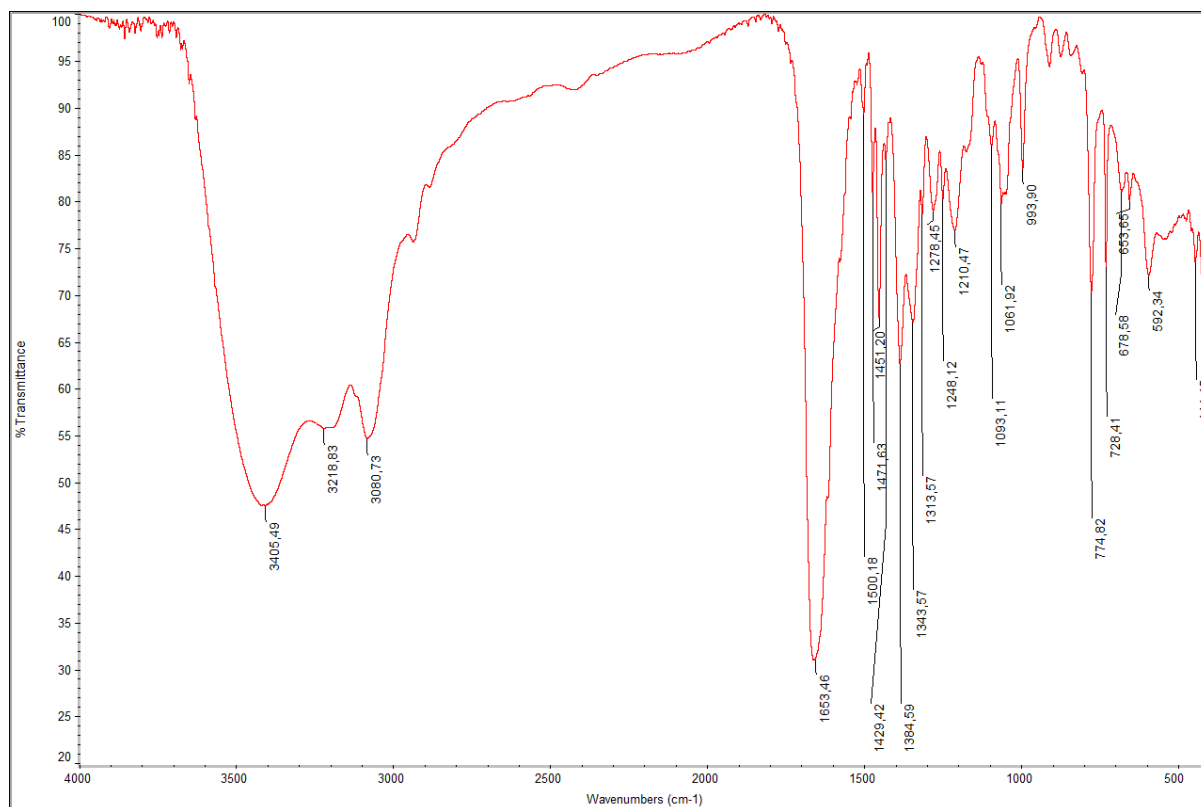

Figure S51. FT-IR of 7

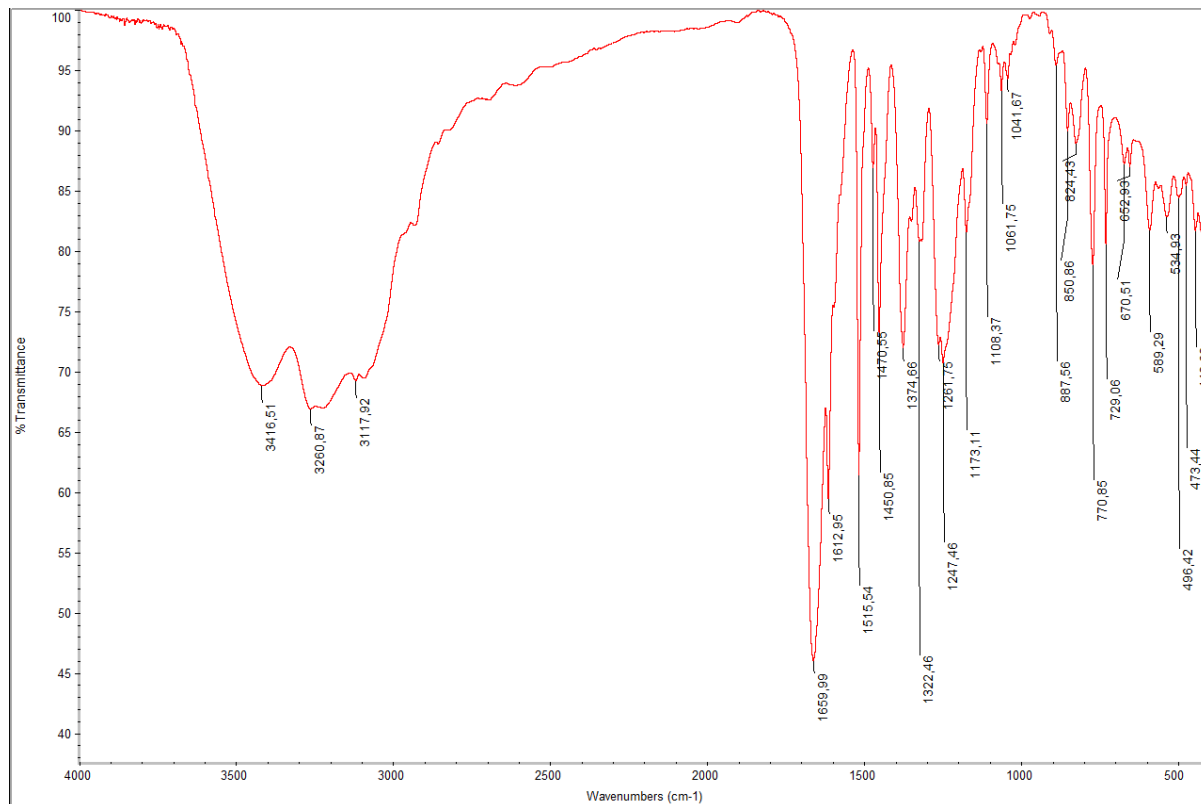

Figure S52. FT-IR of 8

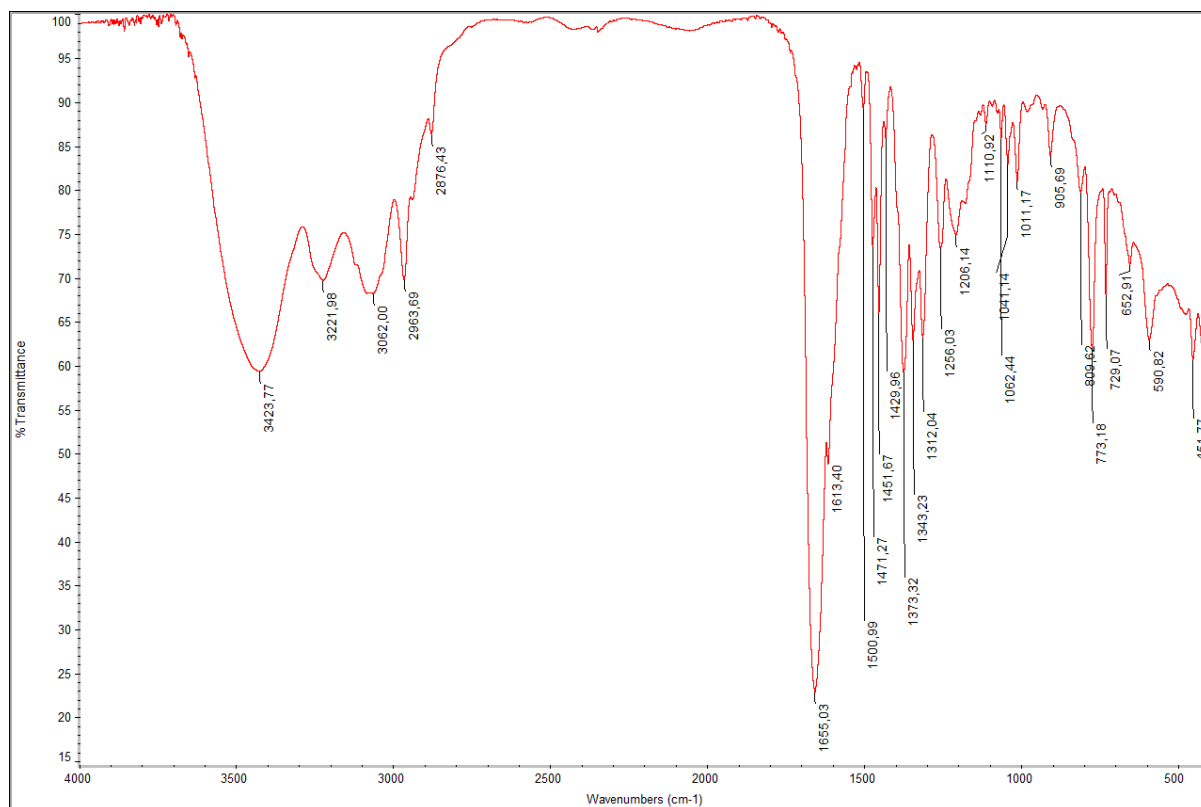

Figure S53. FT-IR of **9**

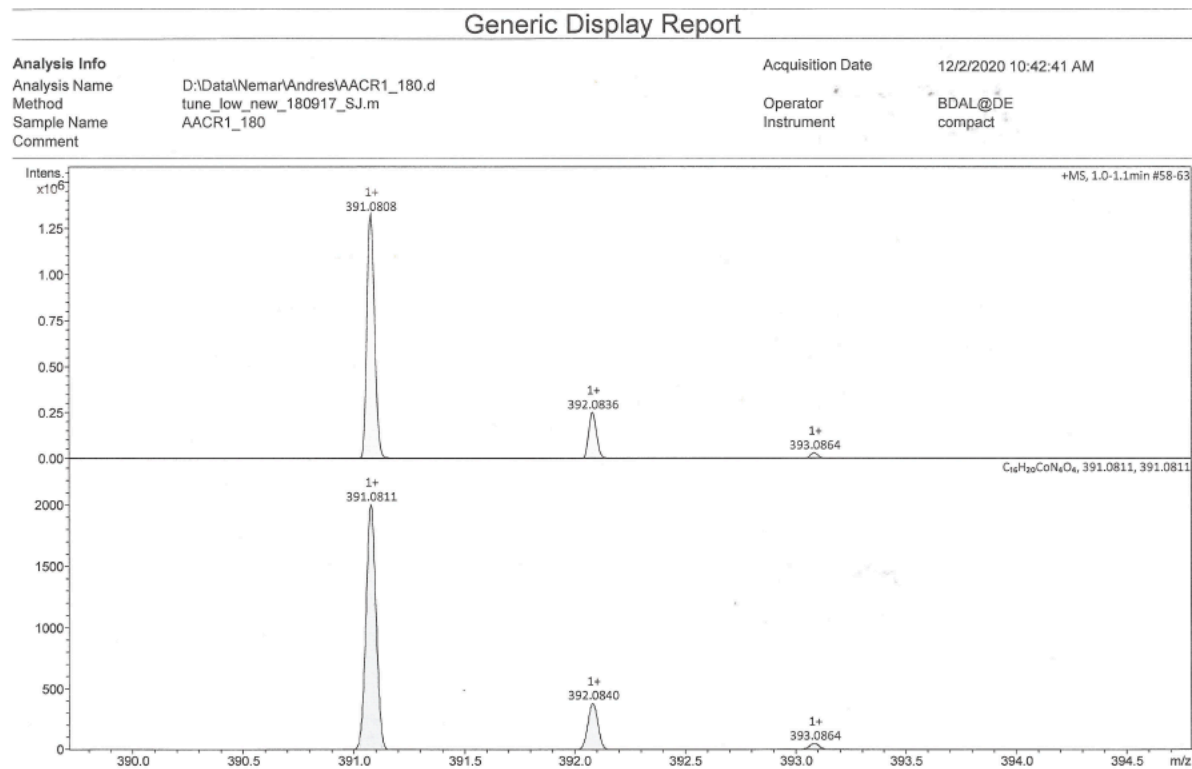

Figure S54. HRMS of **1**



## Generic Display Report

|                      |                                      |                  |                        |
|----------------------|--------------------------------------|------------------|------------------------|
| <b>Analysis Info</b> | D:\Data\Nemar\Andres\AACR1_165_A_2.d | Acquisition Date | 12/22/2020 10:37:06 AM |
| Analysis Name        | tune_mid_20151214_SJ.m               | Operator         | BDAL@DE                |
| Method               | AACR1_165_A_2                        | Instrument       | compact                |
| Sample Name          |                                      |                  |                        |
| Comment              |                                      |                  |                        |

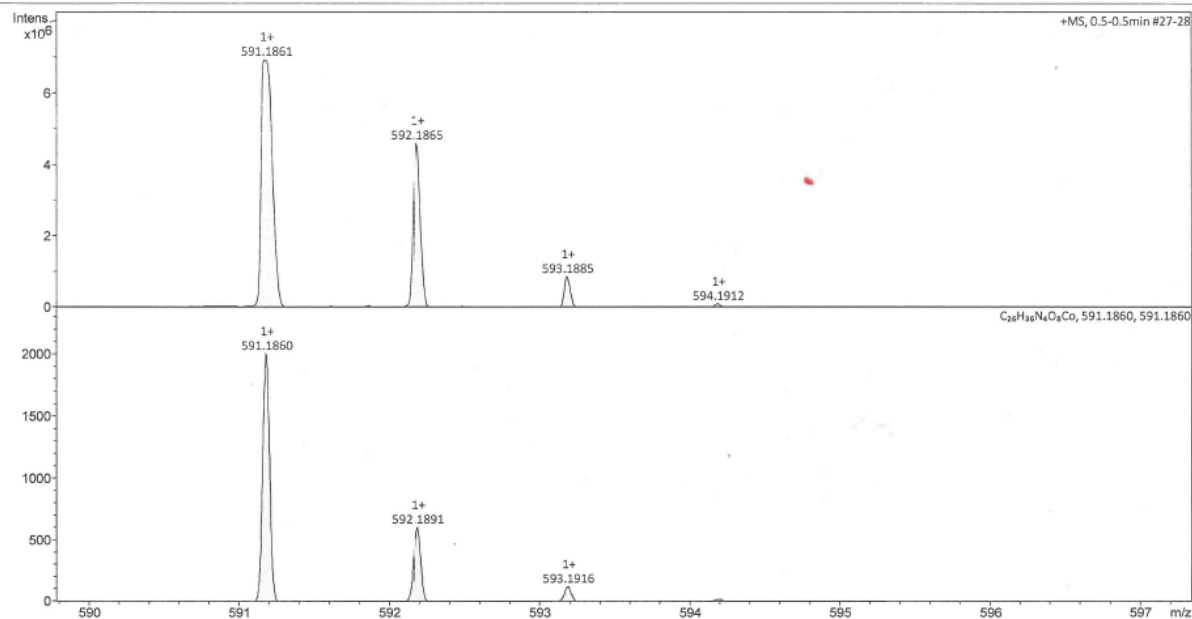

Figure S55. HRMS of 2

## Display Report

|                      |                                                   |                  |                        |
|----------------------|---------------------------------------------------|------------------|------------------------|
| <b>Analysis Info</b> | D:\Data\Nemar\Old_Files\2021\Andres\AACR1_184_B.d | Acquisition Date | 11/19/2021 12:06:12 PM |
| Analysis Name        | tune_mid_20jan_2016_SJ.m                          | Operator         | BDAL@DE                |
| Method               | AACR1_184_C                                       | Instrument       | compact                |
| Sample Name          |                                                   |                  | 8255754.20020          |
| Comment              |                                                   |                  |                        |

|                              |            |                      |          |                  |           |
|------------------------------|------------|----------------------|----------|------------------|-----------|
| <b>Acquisition Parameter</b> |            |                      |          |                  |           |
| Source Type                  | ESI        | Ion Polarity         | Positive | Set Nebulizer    | 0.4 Bar   |
| Focus                        | Not active | Set Capillary        | 4000 V   | Set Dry Heater   | 200 °C    |
| Scan Begin                   | 50 m/z     | Set End Plate Offset | -500 V   | Set Dry Gas      | 3.0 l/min |
| Scan End                     | 3000 m/z   | Set Charging Voltage | 2000 V   | Set Divert Valve | Source    |
|                              |            | Set Corona           | 0 nA     | Set APCI Heater  | 0 °C      |

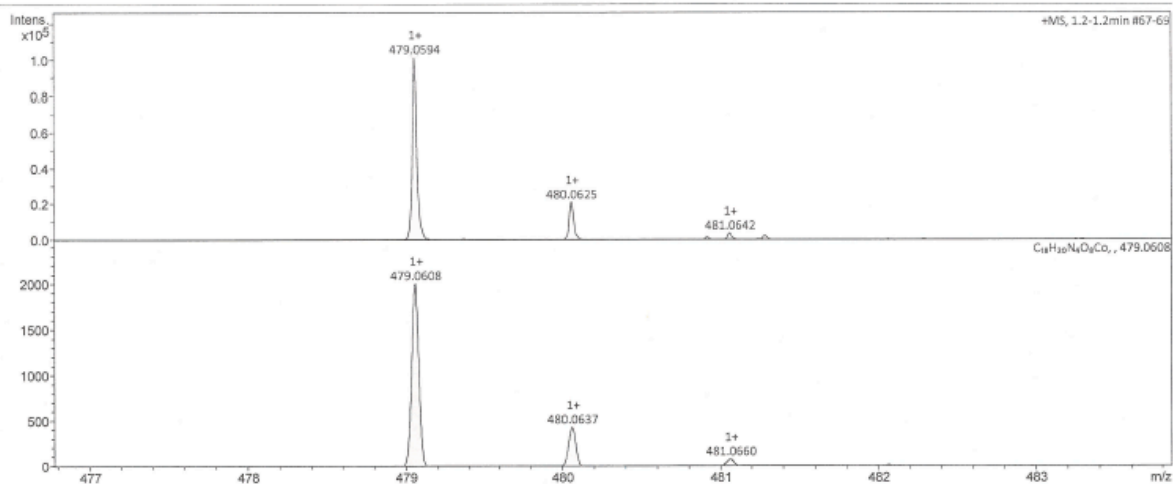

Figure S56. HRMS of 2a

### Display Report

|                      |                                 |                  |                       |               |
|----------------------|---------------------------------|------------------|-----------------------|---------------|
| <b>Analysis Info</b> |                                 | Acquisition Date | 11/12/2021 8:31:45 AM |               |
| Analysis Name        | D:\Data\NemarAndres\AACR1_234.d | Operator         | BDAL@DE               |               |
| Method               | tune_mid_20jan_2016_SJ.m        | Instrument       | compact               | 8255754.20020 |
| Sample Name          | AACR1_234                       |                  |                       |               |
| Comment              |                                 |                  |                       |               |

|                              |            |                      |          |                  |           |
|------------------------------|------------|----------------------|----------|------------------|-----------|
| <b>Acquisition Parameter</b> |            |                      |          |                  |           |
| Source Type                  | ESI        | Ion Polarity         | Positive | Set Nebulizer    | 0.4 Bar   |
| Focus                        | Not active | Set Capillary        | 4000 V   | Set Dry Heater   | 200 °C    |
| Scan Begin                   | 50 m/z     | Set End Plate Offset | -500 V   | Set Dry Gas      | 3.0 l/min |
| Scan End                     | 3000 m/z   | Set Charging Voltage | 2000 V   | Set Divert Valve | Source    |
|                              |            | Set Corona           | 0 nA     | Set APCI Heater  | 0 °C      |

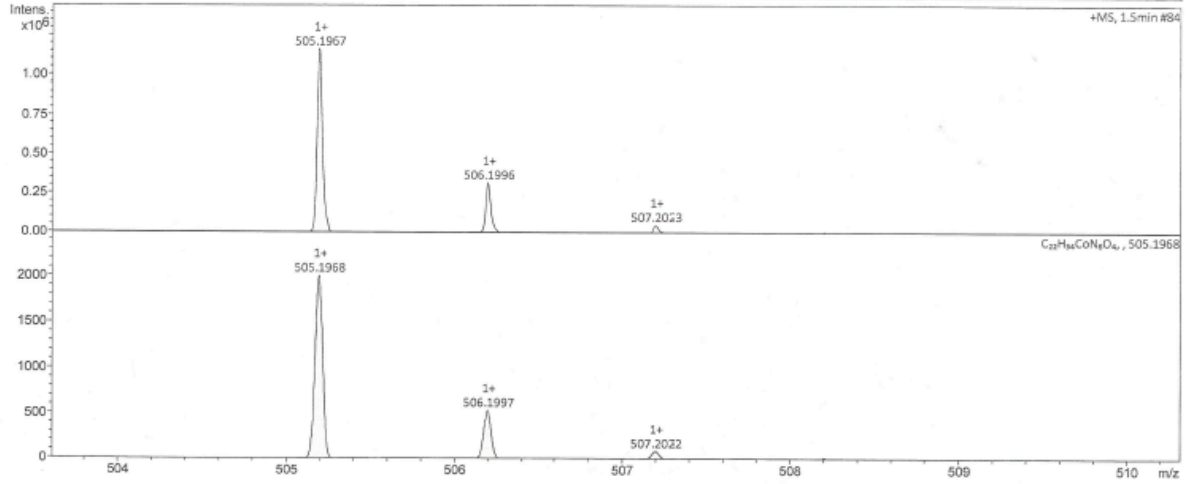

Figure S57. HRMS of 3

### Generic Display Report

|                      |                                 |                  |                     |  |
|----------------------|---------------------------------|------------------|---------------------|--|
| <b>Analysis Info</b> |                                 | Acquisition Date | 5/3/2021 5:39:12 PM |  |
| Analysis Name        | D:\Data\NemarAndres\AACR1_204.d | Operator         | BDAL@DE             |  |
| Method               | tune_mid_20jan_2016_SJ.m        | Instrument       | compact             |  |
| Sample Name          | AACR1_204                       |                  |                     |  |
| Comment              |                                 |                  |                     |  |

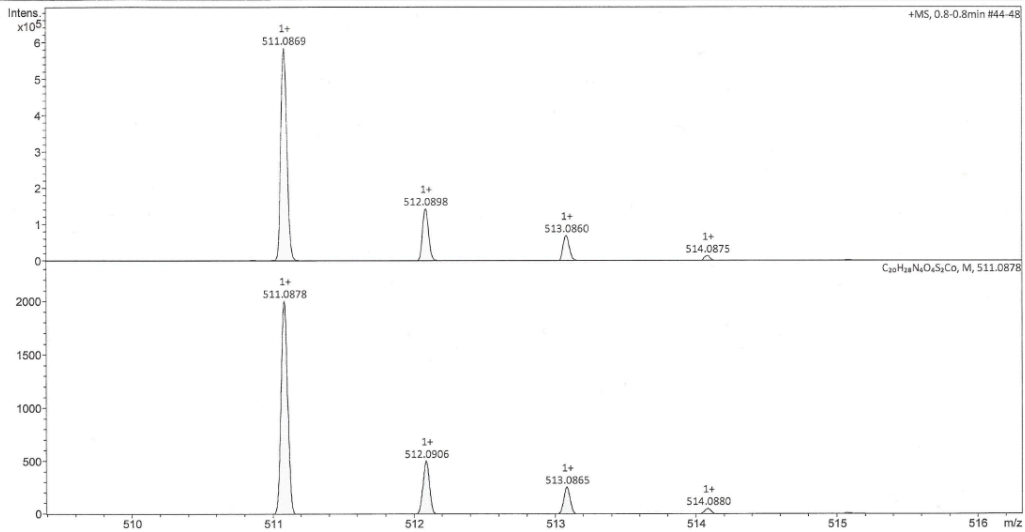

Figure S58. HRMS of 4

### Generic Display Report

**Analysis Info**

Analysis Name D:\Data\Nemar\Andres\AACR1\_187.d  
Method tune\_low\_pos\_101020\_SJ.m  
Sample Name AACR1\_187  
Comment

Acquisition Date 1/12/2021 5:20:40 PM

Operator BDAL@DE  
Instrument compact

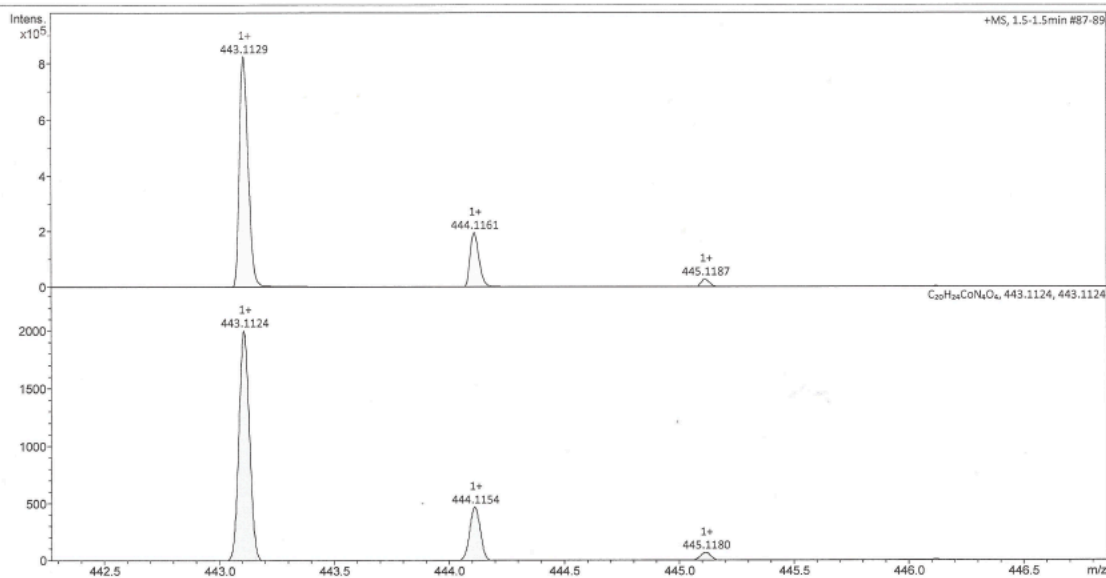

Bruker Compass DataAnalysis 4.3

printed: 1/14/2021 12:24:23 PM

by: BDAL@DE

Page 1 of 1

Figure S59. HRMS of 5

### Generic Display Report

**Analysis Info**

Analysis Name D:\Data\Nemar\Andres\AACR1\_206.d  
Method tune\_mid\_20jan\_2016\_SJ.m  
Sample Name AACR1\_206  
Comment

Acquisition Date 5/3/2021 5:47:31 PM

Operator BDAL@DE  
Instrument compact

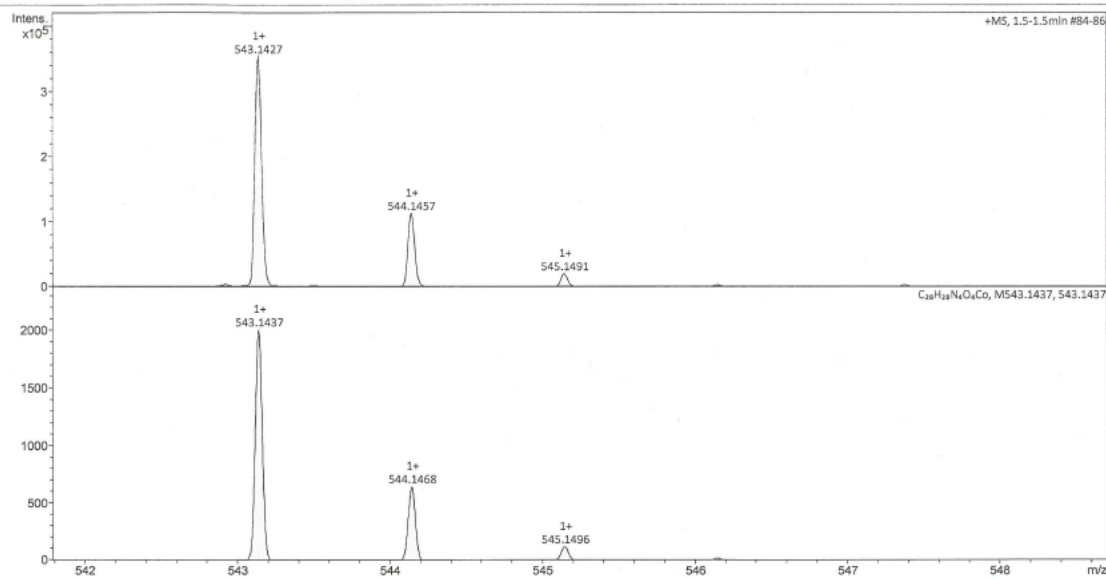

Bruker Compass DataAnalysis 4.3

printed: 5/4/2021 10:33:53 AM

by: BDAL@DE

Page 1 of 1

Figure S60. HRMS of 6

# Generic Display Report

## Analysis Info

Analysis Name D:\Data\Nemar\Andres\AACR1\_181.d  
Method tune\_low\_new\_180917\_SJ.m  
Sample Name AACR1\_181  
Comment

Acquisition Date 12/2/2020 11:00:47 AM

Operator BCAL@DE  
Instrument compact

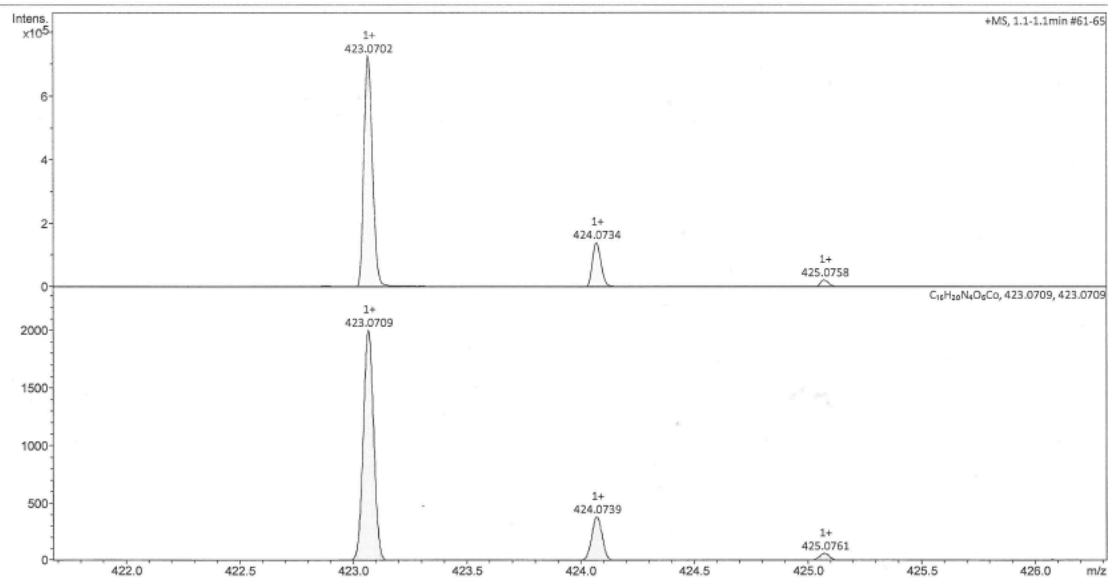

Bruker Compass DataAnalysis 4.3

printed: 12/2/2020 11:18:28 AM

by: BDAL@DE

Page 1 of 1

Figure S61. HRMS of 7

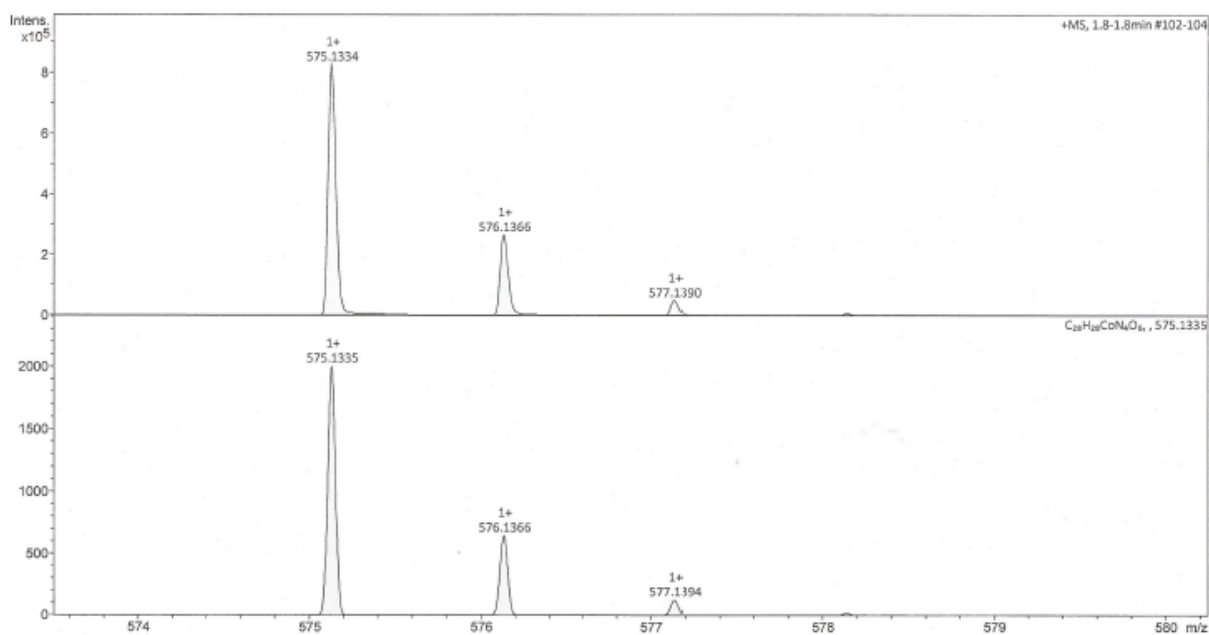

Figure S62. HRMS of 8

## Generic Display Report

|                      |                                  |                  |                        |
|----------------------|----------------------------------|------------------|------------------------|
| <b>Analysis Info</b> | D:\Data\Nemar\Andres\AACR1_183.d | Acquisition Date | 12/18/2020 10:20:30 AM |
| Analysis Name        | tune_low_pos_101020_SJ.m         | Operator         | BDAL@DE                |
| Method               | AACR1_183                        | Instrument       | compact                |
| Sample Name          |                                  |                  |                        |
| Comment              |                                  |                  |                        |

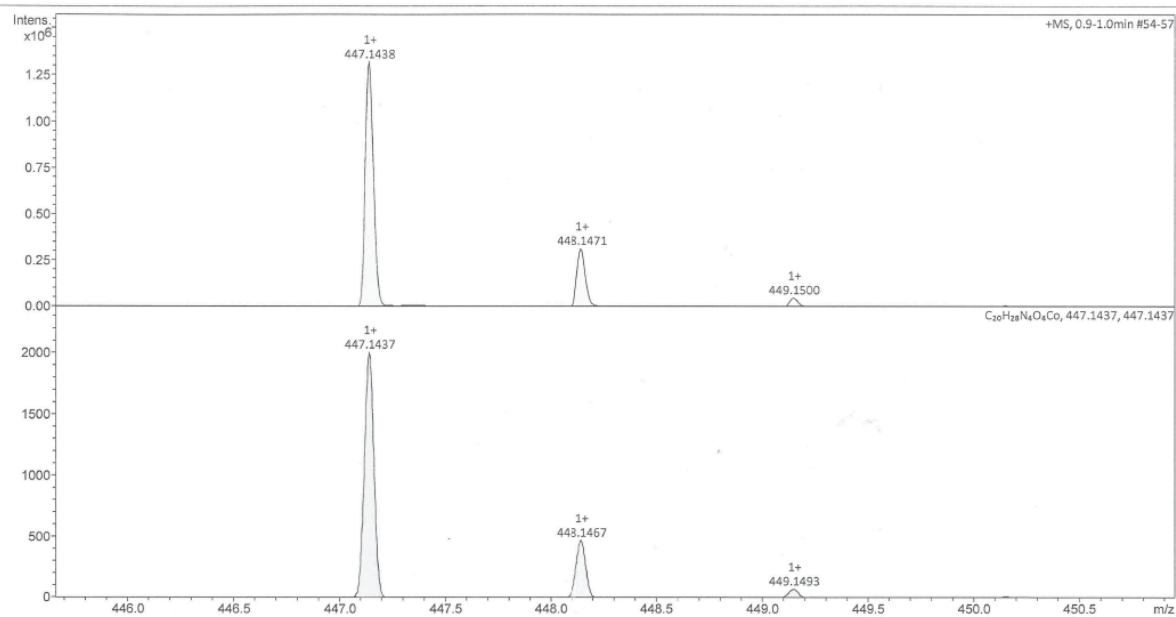

Bruker Compass DataAnalysis 4.3 printed: 12/18/2020 10:27:33 AM by: BDAL@DE Page 1 of 1

Figure S63. HRMS of **9**

Table S3. Catalytic activity of **9** and Styrene Oxide

| Entry                | Catalyst<br>(mol %) | Co-catalyst<br>(mol %) | Conv. (%) | TON  | TOF (h <sup>-1</sup> ) | Time (h) |
|----------------------|---------------------|------------------------|-----------|------|------------------------|----------|
| <b>1</b>             | 2a                  | PPNCl                  | 34        | 675  | 338                    | 2        |
| <b>2</b>             | 4                   | PPNCl                  | 32        | 649  | 324                    | 2        |
| <b>3</b>             | 7                   | PPNCl                  | 29        | 582  | 291                    | 2        |
| <b>4</b>             | 3                   | PPNCl                  | 36        | 720  | 360                    | 2        |
| <b>5</b>             | 2a                  | PPNCl                  | >99       | 1980 | 396                    | 5        |
| <b>6<sup>a</sup></b> | 4                   | PPNCl                  | >99       | 1980 | 396                    | 5        |

|          |   |       |     |      |     |   |
|----------|---|-------|-----|------|-----|---|
| <b>7</b> | 7 | PPNCl | >98 | 1960 | 392 | 5 |
| <b>8</b> | 3 | PPNCl | >99 | 1980 | 396 | 5 |

Reaction conditions: [cat]<sub>0</sub>: [co-cat]<sub>0</sub>: [PO]<sub>0</sub> <sup>a</sup>1:1:2000, (0.015 mmol, 0.015 mmol, 30 mmol) 120 °C, P<sub>CO2</sub> = 20 bar, PO conversion determined from the relative integrals in the <sup>1</sup>H NMR spectrum using mesitylene as the internal standard, Turnover number (TON) = number of moles of PO consumed/number of moles of catalyst. Turnover frequency (TOF) = TON/ time (h).

Table S4. Coupling of PO and CO<sub>2</sub> with catalysts 1-9

| <b>Entry</b>          | <b>Catalyst<br/>(mol %)</b> | <b>Co-catalyst<br/>(mol %)</b> | <b>Conv.<br/>(%)</b> | <b>TON</b> | <b>TOF (h<sup>-1</sup>)</b> | <b>Time<br/>(h)</b> |
|-----------------------|-----------------------------|--------------------------------|----------------------|------------|-----------------------------|---------------------|
| <b>1<sup>a</sup></b>  | 9 (0.025)                   | KI (0.025)                     | 98                   | 3920       | 490                         | 8                   |
| <b>2<sup>a</sup></b>  | 7 (0.025)                   | KI (0.025)                     | 97                   | 3876       | 485                         | 8                   |
| <b>3<sup>a</sup></b>  | 4 (0.025)                   | KI (0.025)                     | 71                   | 2840       | 355                         | 8                   |
| <b>4<sup>b</sup></b>  | 9 (0.016)                   | KI (0.016)                     | 71                   | 4235       | 529                         | 8                   |
| <b>5<sup>b</sup></b>  | 9 (0.016)                   | PPNCl (0.016)                  | 98                   | 5880       | 735                         | 8                   |
| <b>6</b>              | 9 (0.025)                   | -                              | 18                   | 720        | 36                          | 20                  |
| <b>7<sup>b</sup></b>  | 3 (0.016)                   | PPNCl (0.016)                  | 99                   | 5940       | 742                         | 4.5-5               |
| <b>8</b>              | 3 (0.016)                   | -                              | 63                   | 2520       | 126                         | 20                  |
| <b>9</b>              | -                           | -                              | 0                    | 0          | 0                           | 0                   |
| <b>8</b>              | 3 (0.016)                   | -                              | 54                   | 3180       | 162                         | 20                  |
| <b>9<sup>b</sup></b>  | 8 (0.016)                   | PPNCl (0.016)                  | 81                   | 4878       | 243                         | 20                  |
| <b>10<sup>b</sup></b> | 7 (0.016)                   | PPNCl (0.016)                  | 64                   | 3840       | 768                         | 5                   |

|                       |                          |                                            |    |      |      |   |
|-----------------------|--------------------------|--------------------------------------------|----|------|------|---|
| <b>11<sup>b</sup></b> | 4 (0.016)                | PPNCl (0.016)                              | 63 | 3780 | 756  | 5 |
| <b>12<sup>b</sup></b> | 2a (0.016)               | PPNCl (0.016)                              | 72 | 4333 | 866  | 5 |
| <b>13</b>             | 3 (0.016)                | H <sub>2</sub> O 100equiv:PPNCl<br>(0.016) | 30 | 1775 | 1775 | 1 |
| <b>14</b>             | 3 (0.016)                | H <sub>2</sub> O 100equiv:PPNCl<br>(0.016) | 29 | 1774 | 1774 | 1 |
| <b>15</b>             | 2a (0.016)               | PPNCl (0.016)                              | 35 | 2129 | 1064 | 2 |
| <b>16</b>             | 3 deprotected<br>(0.016) | PPNCl (0.016)                              | 38 | 2250 | 1125 | 1 |
| <b>17<sup>b</sup></b> | 3 deprotected<br>(0.016) | PPNCl (0.016)                              | 80 | 4785 | 957  | 5 |
| <b>18</b>             | 3 140 °C (0.016)         | PPNCl (0.016)                              | 70 | 4204 | 2102 | 2 |
| <b>19</b>             | 3 (0.016) 1 atm          | PPNCl (0.016)                              | 29 | 1680 | 1680 | 1 |
| <b>20</b>             | 3 (0.016) 10 bar         | PPNCl (0.016)                              | 38 | 2280 | 2280 | 1 |

Reaction conditions: [cat]<sub>0</sub>: [co-cat]<sub>0</sub>: [PO]<sub>0</sub> <sup>a</sup>1:1:6000 120 °C, P<sub>CO<sub>2</sub></sub> = 20 bar, PO conversion determined from the relative integrals in the <sup>1</sup>H NMR spectrum using mesitylene as the internal standard, Turnover number (TON) = number of moles of PO consumed/number of moles of catalyst. Turnover frequency (TOF) = TON/ time (h).

Table S5 NMR of cyclic carbonates

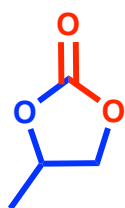

**<sup>1</sup>H NMR, 400 MHz, CDCl<sub>3</sub>: δ/ppm** = 4.85–4.71(1H, m, OCH), 4.48 (1H, m, *J* = 8.4, 7.2 Hz OCH<sub>2</sub>), 4.01 (1H, dd, OCH<sub>2</sub>), 1.47 (3H, d, *J* = 6.3 Hz, CH<sub>3</sub>);  
<sup>13</sup>C {<sup>1</sup>H} NMR, 100 MHz, CDCl<sub>3</sub>: δ/ppm = 55.06, 73.62, 70.61, 19.14 (d, *J* = 3.4).

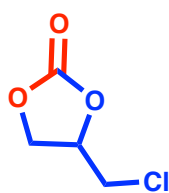

**<sup>1</sup>H NMR, 400 MHz, CDCl<sub>3</sub>: δ/ppm = 3.70-3.81 (m, 2H), 4.38-4.41 (dd, 1H, J=4 Hz, J=8 Hz), 4.56-4.60 (t, 1H, J=8 Hz), 4.95-5.04 (m, 1H)**

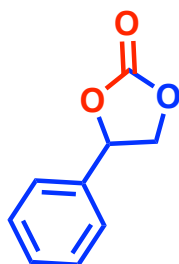

**<sup>1</sup>H NMR, 400 MHz, CDCl<sub>3</sub>: δ/ppm = 4.33-4.37 (t, 1H, J=8Hz), 4.78-4.82 (t, 1H, J=8 Hz), 5.66- 5.70 (t, 1H, J=8Hz), 7.36-7.37 (m, 2H), 7.44-7.45(m, 3H)**

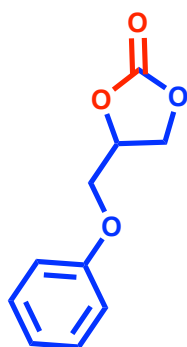

**<sup>1</sup>H NMR, 400 MHz, CDCl<sub>3</sub>: δ/ppm = 7.34–7.28 (2H, m, 2 x ArH), 7.02 (1H, dt, J = 8.3, 0.9 Hz, ArH), 6.93–6.89(2H, m, 2 x ArH), 5.06–4.99 (1H, m, OCH), 4.61 (1H, t, J = 8.4 Hz, OCH<sub>2</sub>), 4.53 (1H, dd, J = 8.5, 5.9 Hz, OCH<sub>2</sub>), 4.24 (1H, dd, J = 10.6, 4.3 Hz, CH<sub>2</sub>OPh), 4.15 (1H, dd, J = 10.6, 3.6 Hz, CH<sub>2</sub>OPh);**

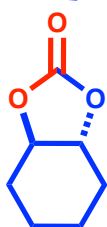

**<sup>1</sup>H NMR, 400 MHz, CDCl<sub>3</sub>: δ/ppm = 1.42-1.46(m,2H), 1.61-1.64(m, 2H), 1.90-1.91(m, 4H), 4.68(s, 2H)**



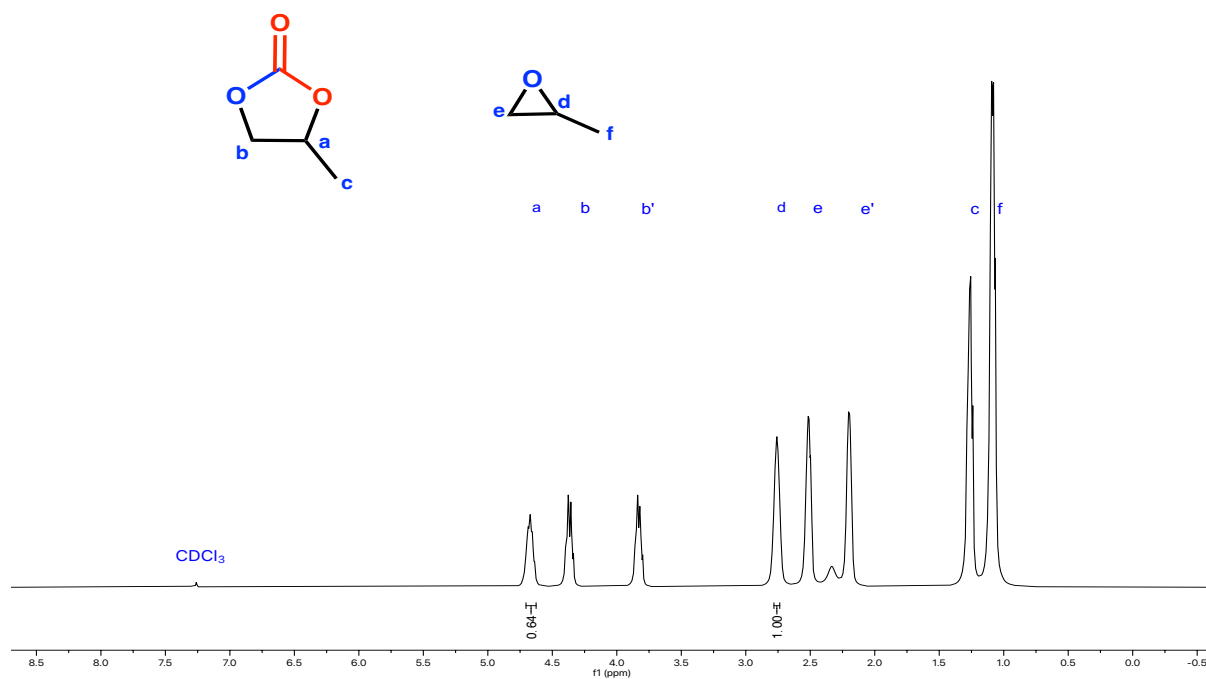

Figure S64. Crude <sup>1</sup>H NMR spectrum (400 MHz, 298 K CDCl<sub>3</sub>) of propylene carbonate showing 39 % conversion based on the integration of methine resonances of unreacted epoxide (2.64 ppm) and the carbonate product (4.59 ppm).

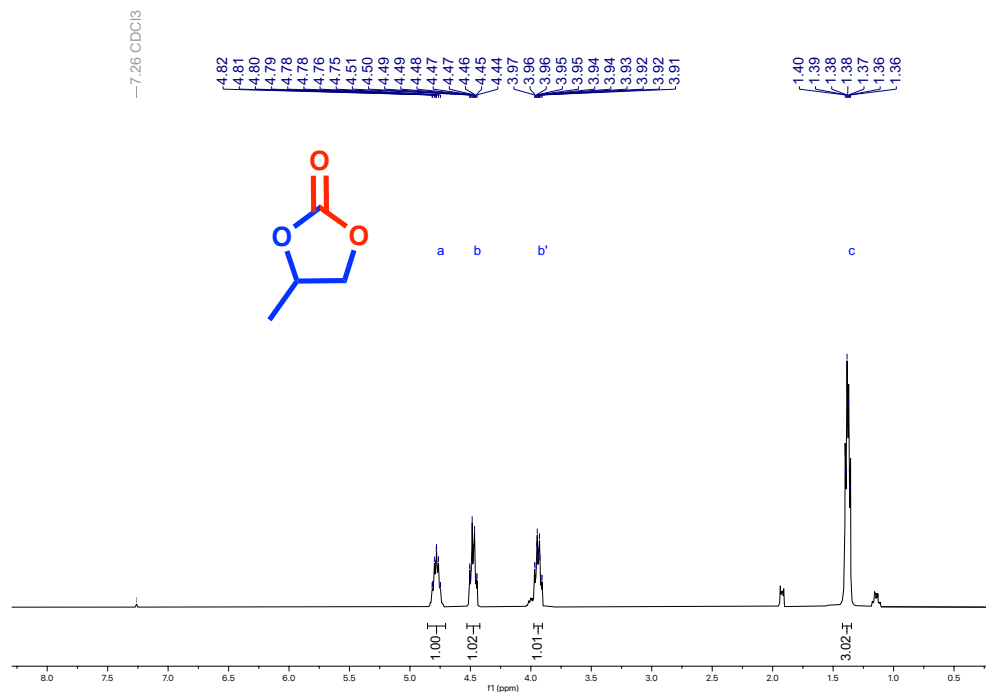

Figure S65. <sup>1</sup>H NMR spectrum (400 MHz, 298 K CDCl<sub>3</sub>) of isolated propylene carbonate.

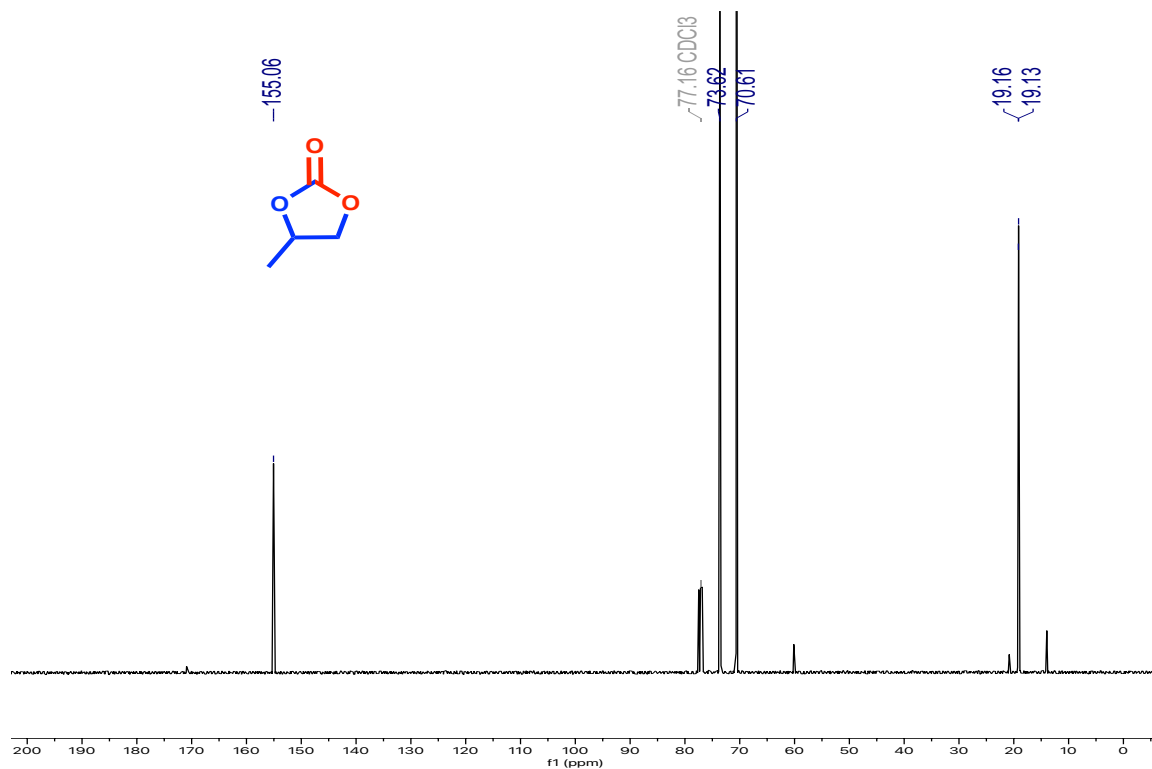

Figure S66.  $^{13}\text{C}\{^1\text{H}\}$  NMR (400 MHz, 298 K  $\text{CDCl}_3$ ) of propylene carbonate

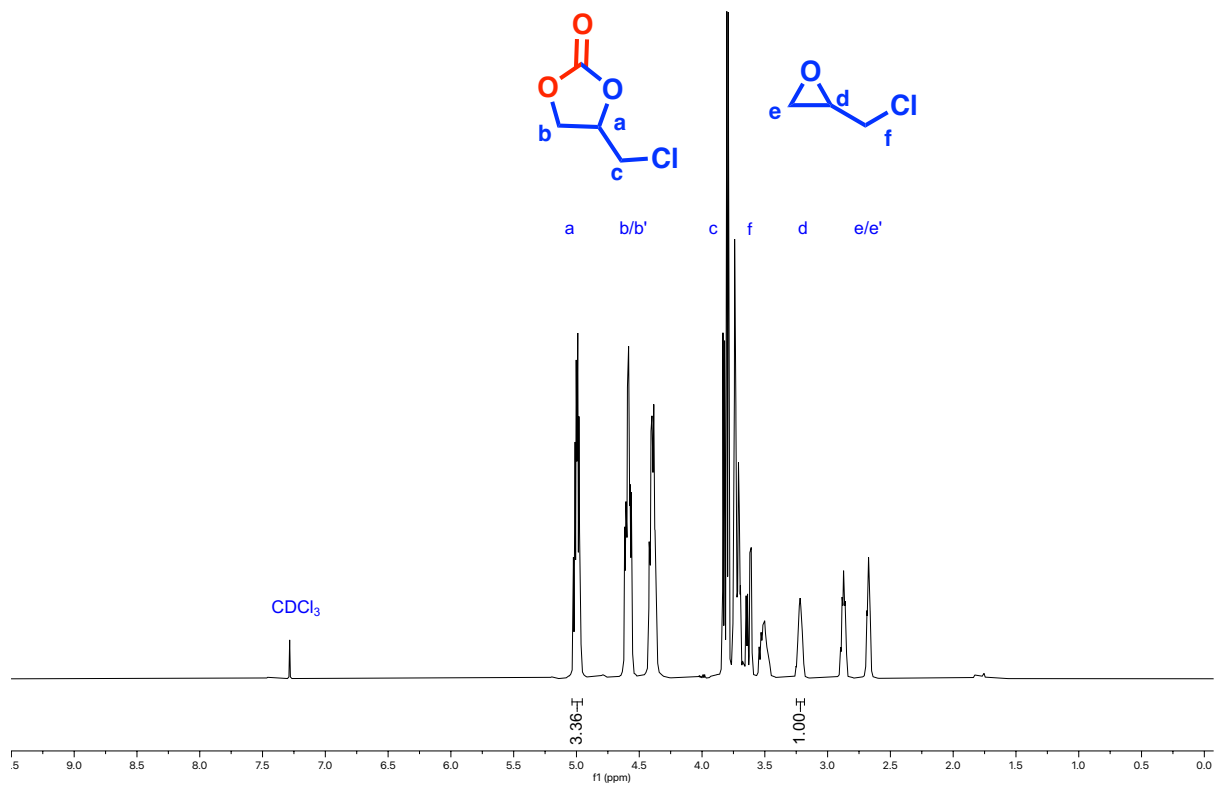

Figure S67. Crude  $^1\text{H}$  NMR spectrum (400 MHz, 298 K  $\text{CDCl}_3$ ) of 4-(chloromethyl)-1,3-dioxolan-2-one showing 77 % conversion based on the integration of resonances of unreacted epoxide at (3.22 ppm) and carbonate at (5.04-4.95 ppm).

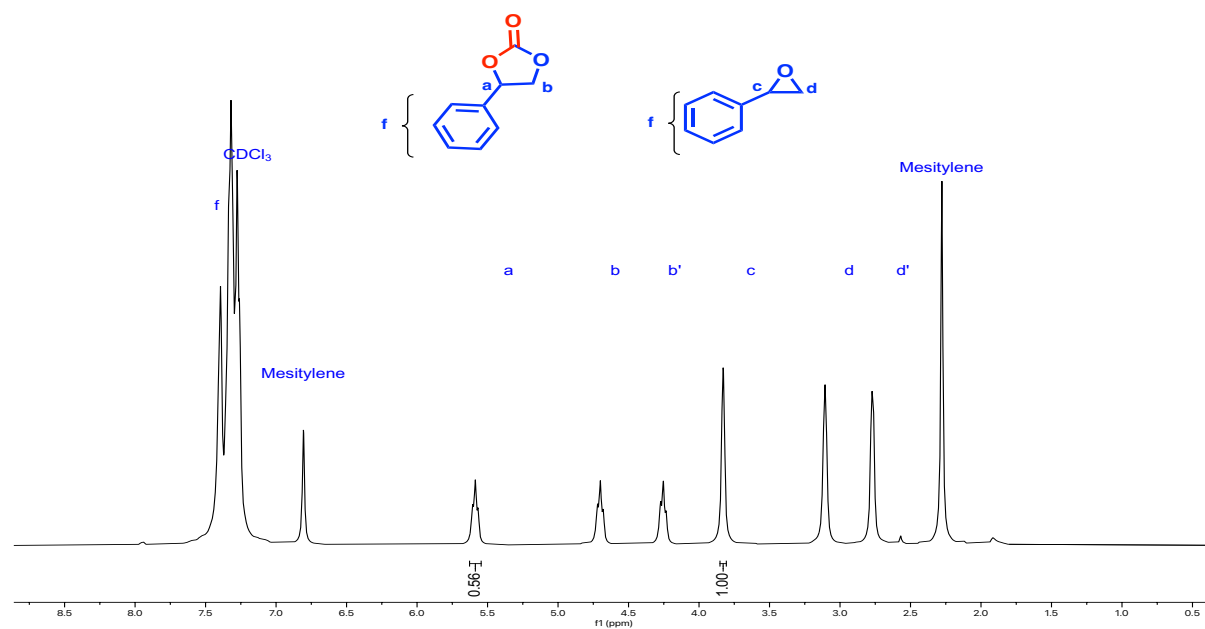

Figure S68. Crude  $^1\text{H}$  NMR spectrum (400 MHz, 298 K  $\text{CDCl}_3$ ) of styrene carbonate showing 36 % conversion based on the integration of resonances of unreacted epoxide at (3.83 ppm) and carbonate at (5.60 ppm).

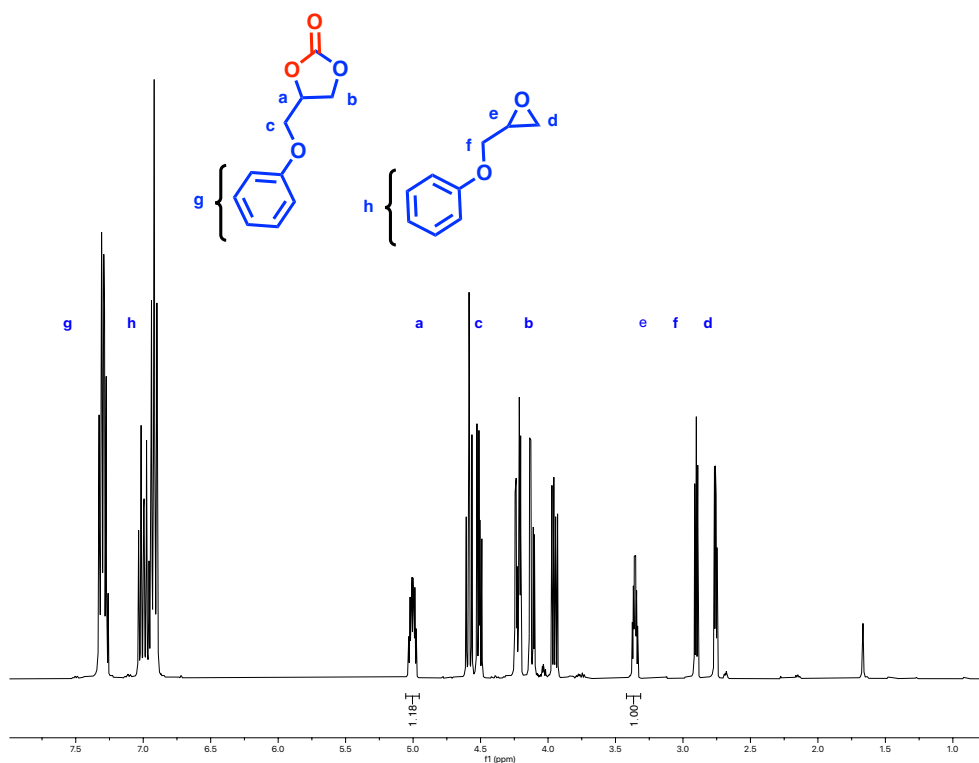

Figure S69. Crude  $^1\text{H}$  NMR spectrum (400 MHz, 298 K  $\text{CDCl}_3$ ) of phenyl glycidyl carbonate showing 54 % conversion based on the integration of resonances of unreacted epoxide at (3.38 ppm) and carbonate at (5.00 ppm).

### ***Kinetic Procedure***

#### **Procedure:**

The reaction profile was determined by fitting the data to plot the concentration ratios against peak area ratios.<sup>1</sup> The kinetic parameters were studied over a temperature range from 80 to 140 °C. The data were fitted to the following equations:

$$\text{Rate} = k [\text{epoxide}]^a [\text{CO}_2]^b [\text{cat}]^c [\text{PPNCl}]^d \quad (1)$$

$$\text{Rate} = K_{\text{obs}} [\text{epoxide}]^a \quad (2)$$

$$\text{Rate} = \frac{-d[\text{epoxide}]}{dt} \quad (3)$$

Where [epoxide],  $[\text{CO}_2]$ , [cat] and [PPNCl] are the propylene oxide, carbon dioxide, catalyst, and co-catalyst concentrations, respectively; a, b, c and d are the order of reactions with respect to propylene oxide, carbon dioxide, catalyst and PPNCl, respectively;  $t$  is time and  $k_{\text{obs}}$

are the observed pseudo-first-order rate constant for propylene oxide conversion. To simplify the equation and solve for  $k$ , it can be assumed that the concentration of cat and PPnCl are constant during the reaction and carbon dioxide is in excess to give high dilution so that  $a = 1$ . Thus, the following pseudo-first-order kinetic rate law is used to simplify eqn. (2) to calculate the observed pseudo-first-order rate constant ( $k_{\text{obs}}$ ) for propylene oxide conversion.<sup>1</sup> Combining and integrating Eqn (2) and (3) as a function of time gives the following conversion

$$-\ln[\text{epoxide}] = k_{\text{obs}}t \quad (4)$$

Using the Arrhenius equation Eqn (5), the activation energy for the reaction can be calculated from the relationship between the observed rate constant and temperature:

$$k_{\text{obs}} = A \exp\left(-\frac{E_a}{RT}\right) \quad (5)$$

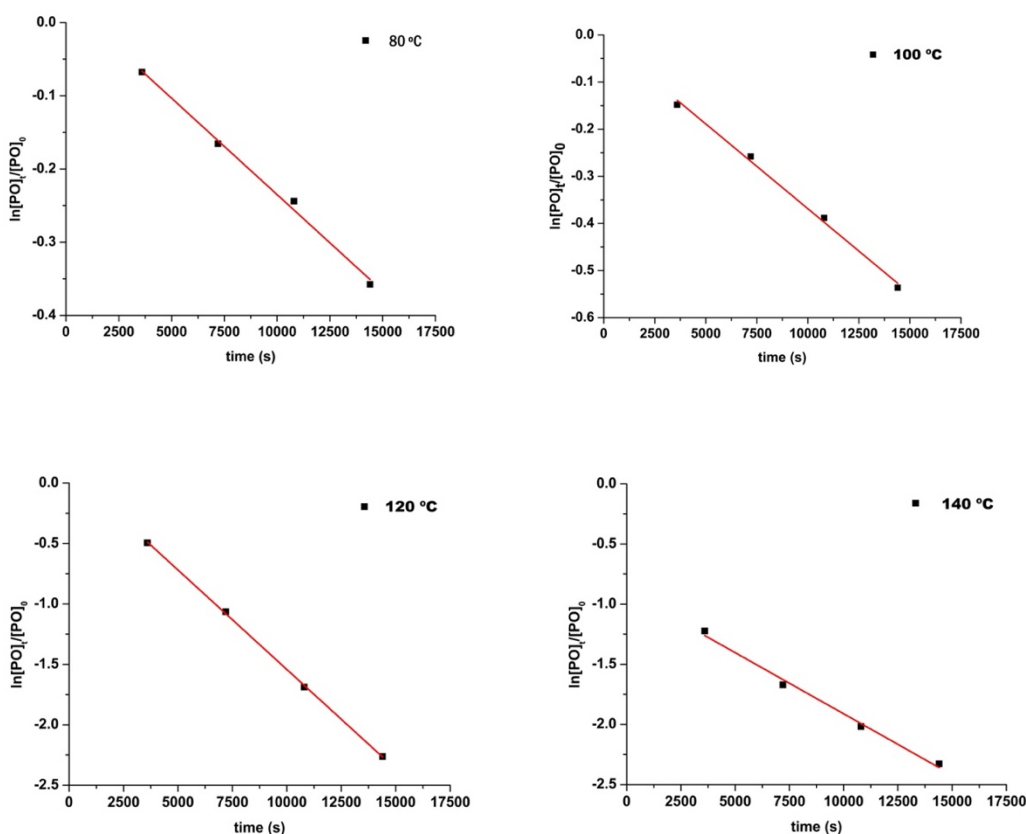

Figure S70. A semilogarithmic plot of  $\ln[PO]_i/[PO]_0$  vs. time showing the initial reaction rates for PC at various temperatures with a 20 °C increment. a) 80 °C b) 100 °C c) 120 °C d) 140 °C

Table S6. Data obtained for Arrhenius analysis, linear fits, and calculated rate coefficients for CO<sub>2</sub>/PO coupling at various temperatures.

| Entry | T (K) | Y = mx + c                    | R <sup>2</sup> | k <sub>obs</sub> (s <sup>-1</sup> )                 |
|-------|-------|-------------------------------|----------------|-----------------------------------------------------|
| 1     | 353   | -2.63x10 <sup>-5</sup> + 0.03 | 0.9930         | 2.63x10 <sup>-5</sup><br>(±0.02x10 <sup>-5</sup> )  |
| 2     | 373   | -4.62x10 <sup>-5</sup> + 0.01 | 0.9934         | 4.62x10 <sup>-5</sup><br>(±0.01x10 <sup>-5</sup> )  |
| 3     | 393   | -1.01x10 <sup>-4</sup> + 0.89 | 0.9995         | 1.01x10 <sup>-4</sup><br>(± 0.02x10 <sup>-4</sup> ) |
| 4     | 413   | -1.64x10 <sup>-4</sup> + 0.10 | 0.9890         | 1.64x10 <sup>-4</sup><br>(±0.06x10 <sup>-4</sup> )  |

k<sub>obs</sub> = slope of linear fitting of the semilogarithmic plot of ln[PO]<sub>t</sub>/[PO]<sub>0</sub> vs time.

Table S7. Data obtained for Eyring analysis, linear fits, and calculated apparent reaction rate k<sub>p</sub> for CO<sub>2</sub>/PO coupling at various temperatures.

| Entry | T (K) | k <sub>obs</sub> (s <sup>-1</sup> )                | k <sub>p</sub> (L mol <sup>-1</sup> s <sup>-1</sup> ) | Ln(k/T)  |
|-------|-------|----------------------------------------------------|-------------------------------------------------------|----------|
| 1     | 353   | 2.63x10 <sup>-5</sup><br>(±0.02x10 <sup>-5</sup> ) | 1.07x10 <sup>-5</sup><br>(±0.08x10 <sup>-5</sup> )    | -17.3106 |
| 2     | 373   | 4.62x10 <sup>-5</sup><br>(±0.01x10 <sup>-5</sup> ) | 1.88x10 <sup>-5</sup><br>(±0.03x10 <sup>-5</sup> )    | -16.8025 |
| 3     | 393   | 1.01x10 <sup>-4</sup>                              | 4.13x10 <sup>-5</sup>                                 | -16.0679 |

|   |     |                             |                             |          |
|---|-----|-----------------------------|-----------------------------|----------|
|   |     | $(\pm 0.02 \times 10^{-4})$ | $(\pm 0.01 \times 10^{-5})$ |          |
| 4 | 413 | $1.64 \times 10^{-4}$       | $6.69 \times 10^{-5}$       | -15.6352 |
|   |     | $(\pm 0.06 \times 10^{-4})$ | $(\pm 0.06 \times 10^{-5})$ |          |

$k_p = k_{obs}/[cat]$ ,  $[cat] = 2.46 \text{ mM}$

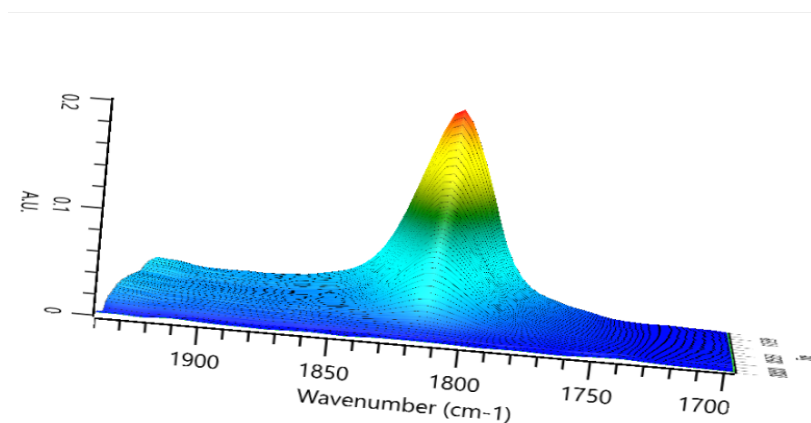

Figure S71. Three-dimensional stack plots of the IR spectra showing the variation of the intensity of the PC C=O stretching band at  $1817 \text{ cm}^{-1}$  vs time. Reaction conditions [cat]:[co-cat]:[PO] 1:1:6000,  $PCO_2 = 20 \text{ bar}$ .

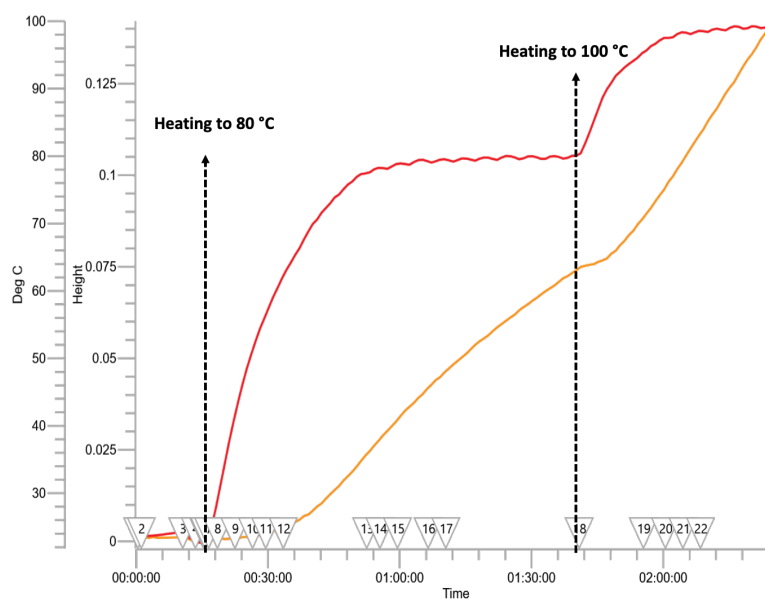

Figure S72. Growth trace of the PC at  $1817 \text{ cm}^{-1}$  (orange) and probe temperature (red).

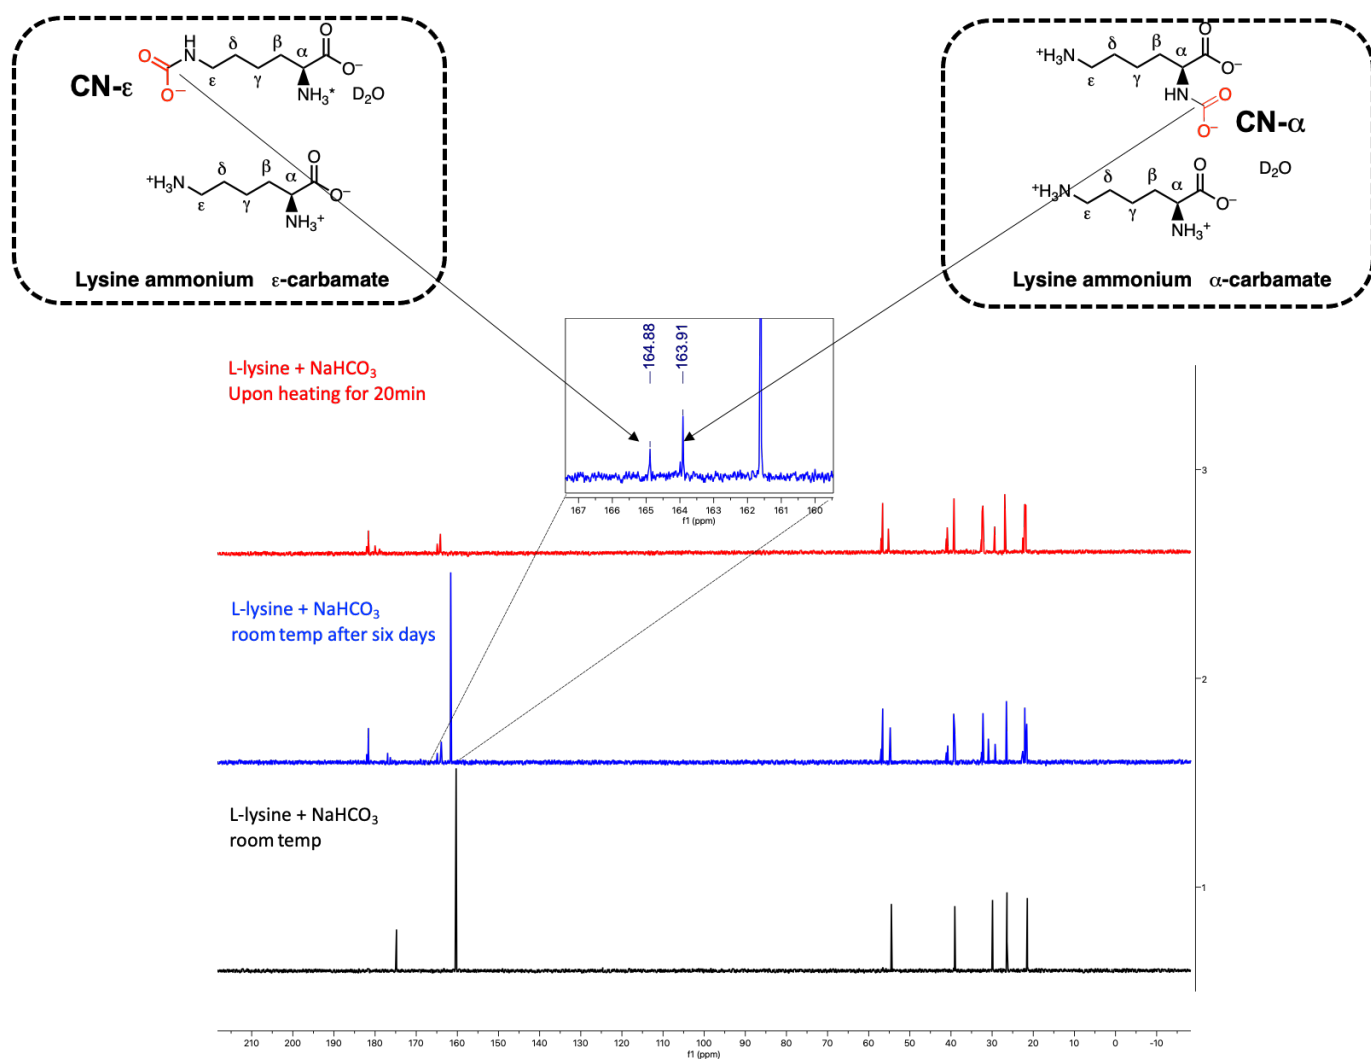

Figure S73.  $^{13}\text{C}$  NMR spectra of L-lysine ammonium  $\alpha$ - and  $\epsilon$ -carbamate in  $\text{D}_2\text{O}$ . L-lysine dihydrochloride (black spectrum). After six days, the carbamate bond of L-lysine ammonium salt (blue spectrum). Upon gradually heating to  $100\text{ }^\circ\text{C}$  carbamates formed after 20min (red spectrum).



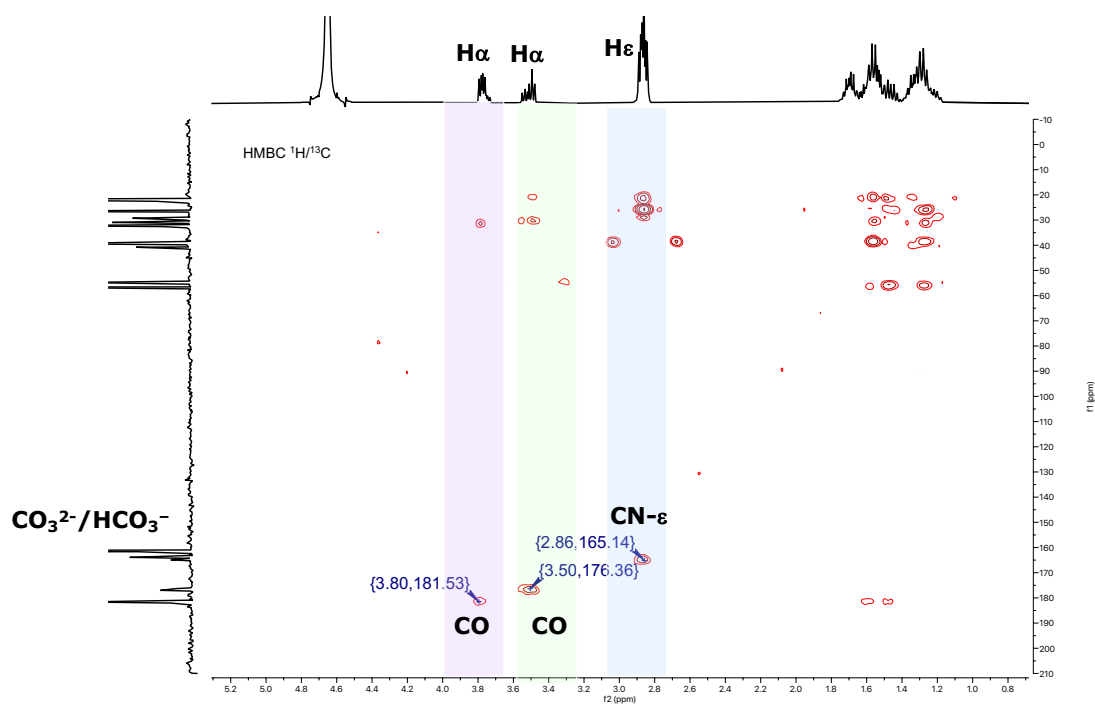

Figure S74.  $^1\text{H}/^{13}\text{C}$  HMBC spectrum of L-lysine ammonium  $\epsilon$ -carbamate obtained by reacting L-lysine dihydrochloride in the presence of sodium bicarbonate *after six days at room temperature*. The cross-peak between  $\text{H}\alpha$  ( $\delta = 3.5$  ppm) and the carboxylate carbon CO ( $\delta = 176$  ppm) is related to the formation of an  $\alpha$ -ammonium ion. The presence of an  $\epsilon$ -carbamate ion is confirmed by the cross-peak between  $\text{H}\epsilon$  ( $\delta = 2.86$  ppm) and the carbamyl signal at  $\delta = 165$  ppm (CN- $\epsilon$ ).<sup>2,3</sup>

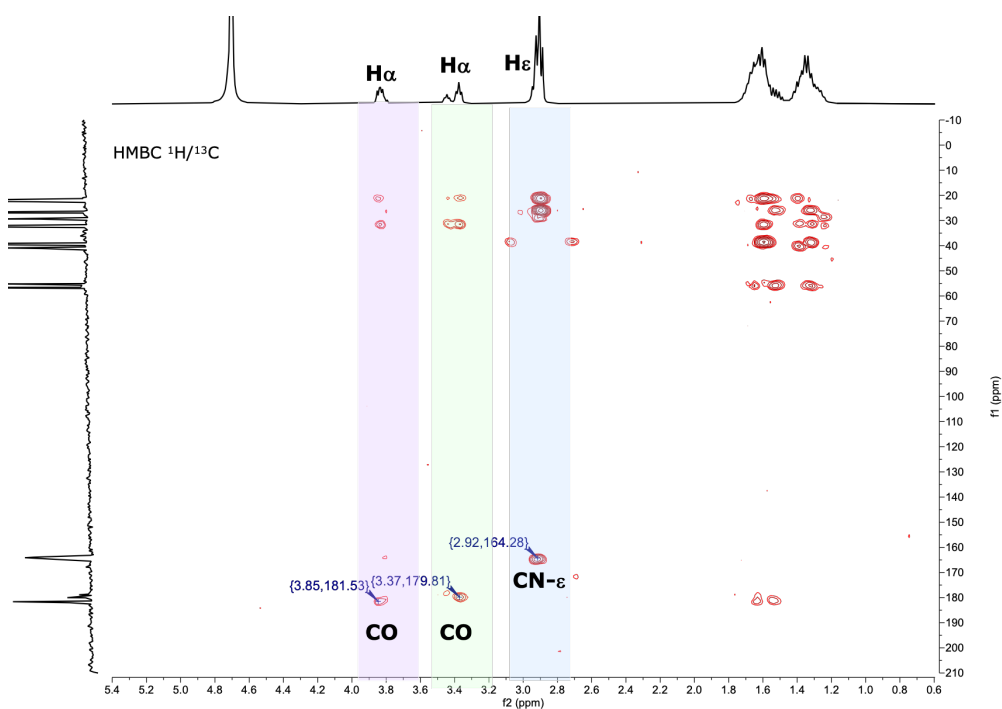

Figure S75.  $^1\text{H}/^{13}\text{C}$  HMBC spectrum of L-lysine ammonium  $\epsilon$ - carbamate obtained by reacting L-lysine dihydrochloride in the presence of sodium bicarbonate *after gradually heating for 20 minutes*. The cross-peak between  $\text{H}\alpha$  ( $\delta = 3.37$  ppm) and the carboxylate carbon  $\text{CO}$  ( $\delta = 179.81$  ppm) is related to the formation of an  $\alpha$ -ammonium ion. The presence of an  $\epsilon$ -carbamate ion is confirmed by the cross-peak between  $\text{H}\epsilon$  ( $\delta = 2.92$  ppm) and the carbamyl signal at  $\delta = 164$ -165 ppm ( $\text{CN-}\epsilon$ ).<sup>2,3</sup>

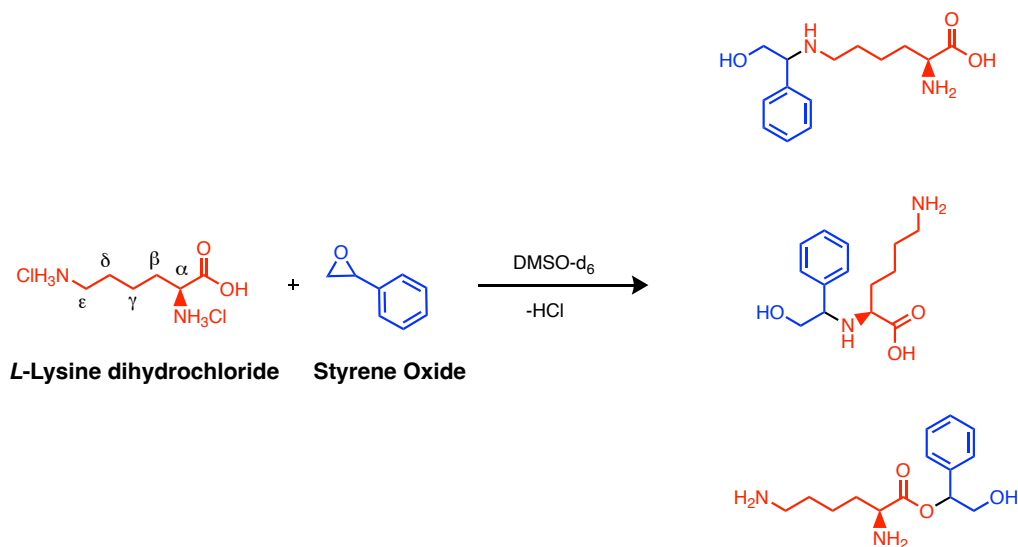

Figure S76. A possible mixture of products resulting from the reaction between L-lysine and styrene oxide at temperatures above 80 °C.<sup>4</sup>

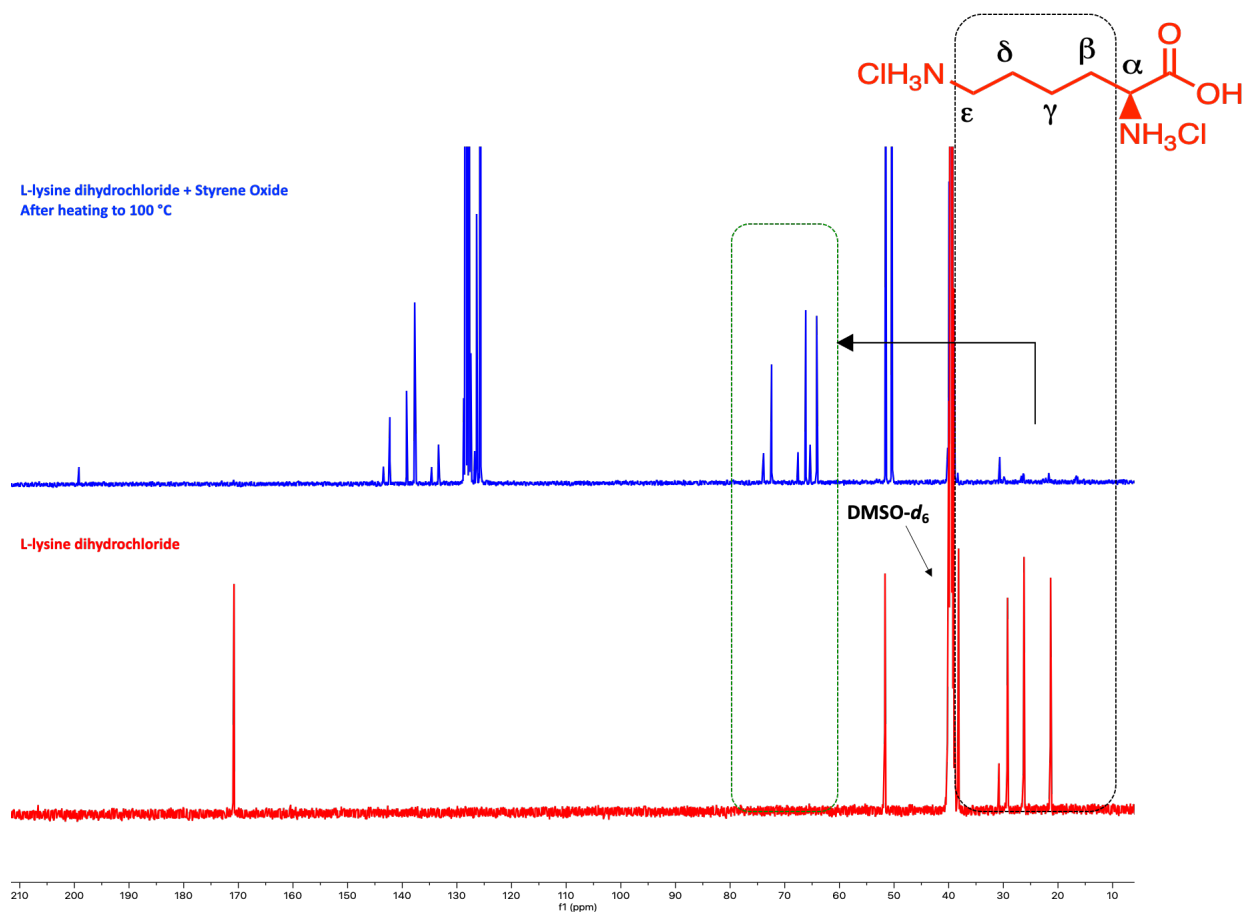

Figure S77.  $^{13}\text{C}$  NMR spectra of L-lysine dihydrochloride in DMSO- $d_6$  (red spectrum) mixture of L-lysine dihydrochloride and styrene oxide (blue spectrum).

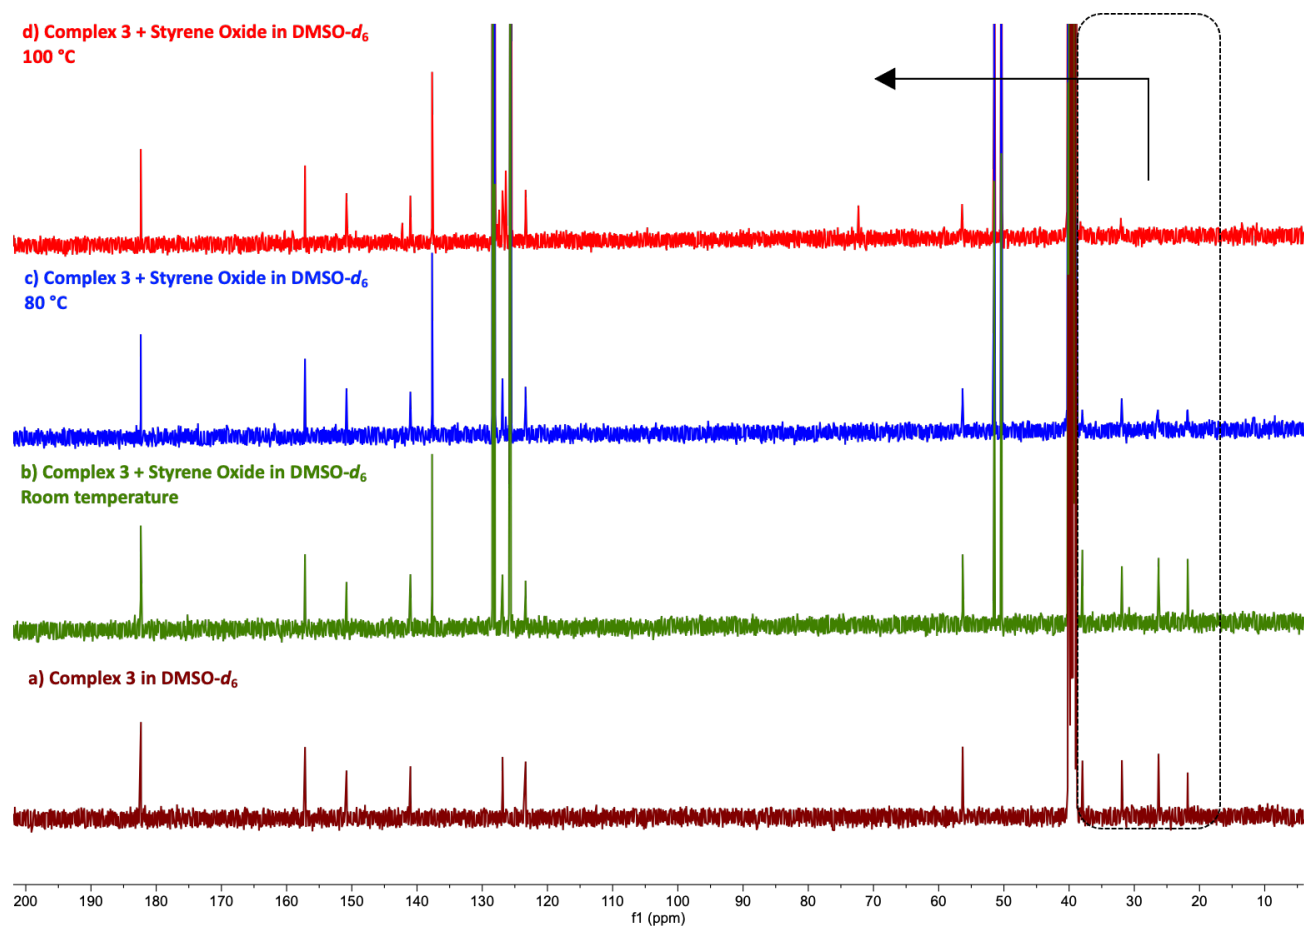

Figure S78. a)  $^{13}\text{C}$  NMR spectra of complex 3 in  $\text{DMSO-}d_6$  (maroon spectrum) b) mixture of complex 3 and styrene oxide at room temperature (green spectrum) c) mixture of complex 3 and styrene oxide at  $80\text{ }^\circ\text{C}$  (blue spectrum) mixture of complex 3 and styrene oxide at  $100\text{ }^\circ\text{C}$  (red spectrum).

## References

- (1) Supasitmongkol, S.; Styring, P. A Single Centre Aluminium(III) Catalyst and TBAB as an Ionic Organo-Catalyst for the Homogeneous Catalytic Synthesis of Styrene Carbonate. *Catal. Sci. Technol.* **2014**, *4* (6), 1622–1630. <https://doi.org/10.1039/C3CY01015E>.
- (2) Al-Terkawi, A.-A.; Lamaty, F.; Métro, T.-X. Efficient  $\text{CO}_2$  Sequestration by a Solid–Gas Reaction Enabled by Mechanochemistry: The Case of 1 -Lysine. *ACS Sustain. Chem. Eng.* **2020**, *8* (35), 13159–13166. <https://doi.org/10.1021/acssuschemeng.0c00217>.

- (3) Wei, D.; Junge, H.; Beller, M. An Amino Acid Based System for CO<sub>2</sub> Capture and Catalytic Utilization to Produce Formates. *Chem. Sci.* **2021**, *12* (17), 6020–6024. <https://doi.org/10.1039/D1SC00467K>.
- (4) M. Jágr, J. Mráz, I. Linhart, V. Stránský and M. Pospíšil, *Chem. Res. Toxicol.*, 2007, **20**, 1442-1452.
